# Supplementary material
Source: publisher figshare collection journal article supplement (https://rs.figshare.com/ndownloader/files/13877384)
Supplement: Supplementary file 1 [file 13877384]

## Sheet: nonPhylo
Taxon	F_Bite	F_Bite_Pred	PI_L	PI_U	F_Bite_Resid	F_Bite_Resid_ABS	Outliers	Rank
Dromaius_novaehollandiae	0.963788	2.98057	2.25241	3.70873	-2.01678	2.01678	1	1
Struthio_camelus	1.72181	3.32069	2.59185	4.04953	-1.59888	1.59888	1	2
Plateosaurus_engelhardti	2.45025	3.93086	3.20029	4.66143	-1.48061	1.48061	1	3
Rhea_americana	1.41162	2.86596	2.13798	3.59393	-1.45434	1.45434	1	4
Stegosaurus_stenops	2.94939	4.2239	3.49227	4.95554	-1.27451	1.27451	1	5
Saimiri_sciureus	0.593286	1.86522	1.13787	2.59258	-1.27194	1.27194	1	6
Erlikosaurus_andrewsi	2.42813	3.69103	2.96122	4.42085	-1.2629	1.2629	1	7
Accipiter_striatus	0.152288	1.3947	0.66703	2.12236	-1.24241	1.24241	1	8
Callicebus_torquatus	0.830589	2.02459	1.29726	2.75193	-1.194	1.194	1	9
Accipiter_cooperii	0.491362	1.67034	0.942911	2.39778	-1.17898	1.17898	1	10
Chelus_fimbriata	0.69897	1.69901	0.971588	2.42642	-1.00004	1.00004	1	11
Geospiza_magnirostris	1.84985	0.879854	0.151398	1.60831	0.969996	0.969996	1	12
Gallus_gallus	0.944413	1.90965	1.18231	2.63699	-0.965237	0.965237	1	13
Archaeopteryx_lithographica	0.739448	1.67754	0.950111	2.40497	-0.938093	0.938093	1	14
Buteo_buteo	0.947012	1.85092	1.12357	2.57827	-0.903908	0.903908	1	15
Gallotia_galloti	2.03571	1.13755	0.409552	1.86556	0.898156	0.898156	1	16
Branta_canadensis	1.44008	2.32091	1.59349	3.04833	-0.880836	0.880836	1	17
Callithrix_argentata	0.783904	1.65684	0.929398	2.38428	-0.872936	0.872936	1	18
Cariama_cristata	1.28825	2.07727	1.34993	2.8046	-0.789016	0.789016	1	19
Callithrix_jacchus	0.843233	1.63095	0.903493	2.35841	-0.787718	0.787718	1	20
Falco_columbarius	0.675778	1.45881	0.731213	2.18641	-0.783035	0.783035	1	21
Sus_scrofa	2.57403	3.34321	2.61432	4.07211	-0.76918	0.76918	1	22
Falco_peregrinus	1.11261	1.84852	1.12117	2.57588	-0.735916	0.735916	1	23
Falco_sparverius	0.600973	1.32219	0.594446	2.04994	-0.721222	0.721222	0	24
Aotus_trivirgatus	1.16791	1.88462	1.15728	2.61197	-0.716713	0.716713	0	25
Larus_fuscus	1.17094	1.87316	1.14581	2.60051	-0.70222	0.70222	0	26
Proteles_cristatus	3.35211	2.65936	1.93166	3.38706	0.692745	0.692745	0	27
Callimico_goeldii	1.08493	1.74809	1.0207	2.47548	-0.663154	0.663154	0	28
Cactospiza_pallida	0.201397	0.863991	0.135504	1.59248	-0.662594	0.662594	0	29
Ateles_geoffroyi	1.88468	2.54376	1.81618	3.27134	-0.659078	0.659078	0	30
Anolis_chloris	0.767898	0.121186	-0.609279	0.851651	0.646712	0.646712	0	31
Anolis_equestris	1.76057	1.12731	0.399295	1.85533	0.633261	0.633261	0	32
Uraeginthus_bengalus	0	0.629717	-0.09929	1.35872	-0.629717	0.629717	0	33
Colobus_polykomos	1.9703	2.59809	1.87045	3.32572	-0.627788	0.627788	0	34
Pelomedusa_subrufa	0.90309	1.52791	0.800373	2.25545	-0.62482	0.62482	0	35
Falco_mexicanus	1.13956	1.76201	1.03463	2.4894	-0.622447	0.622447	0	36
Tupinambis_merianae	2.60412	1.99235	1.26502	2.71968	0.611766	0.611766	0	37
Saguinus_fuscicollis	1.05231	1.65684	0.929398	2.38428	-0.604531	0.604531	0	38
Geranoaetus_melanoleucus	1.69897	2.28698	1.55958	3.01438	-0.588015	0.588015	0	39
Paranthropus_boisei	3.57017	2.98972	2.26154	3.71789	0.580455	0.580455	0	40
Sphenodon_punctatus	2.37712	1.79809	1.07072	2.52546	0.579035	0.579035	0	41
Panthera_onca	3.8402	3.26623	2.53751	3.99495	0.573969	0.573969	0	42
Alouatta_guariba	1.88762	2.45472	1.72721	3.18222	-0.567098	0.567098	0	43
Piliocolobus_rufomitratus	2.03503	2.59809	1.87045	3.32572	-0.563059	0.563059	0	44
Monophyllus_redmani	0.146128	0.705513	-0.0233156	1.43434	-0.559385	0.559385	0	45
Macaca_fascicularis	2.95348	2.39907	1.6716	3.12653	0.554414	0.554414	0	46
Phyllostomus_hastatus	1.83251	1.28899	0.561198	2.01678	0.543521	0.543521	0	47
Murina_aenea	1.0976	0.55608	-0.17311	1.28527	0.541525	0.541525	0	48
Lagonosticta_senegala	0	0.526675	-0.202591	1.25594	-0.526675	0.526675	0	49
Estrilda_troglodytes	0	0.526675	-0.202591	1.25594	-0.526675	0.526675	0	50
Euparkeria_capensis	2.33422	1.81898	1.09162	2.54635	0.515235	0.515235	0	51
Macrochelys_temminckii	2.19866	1.68662	0.959193	2.41404	0.51204	0.51204	0	52
Lophostoma_silvicolum	1.45332	0.953387	0.225073	1.6817	0.499931	0.499931	0	53
Murina_cyclotis	1.07555	0.581062	-0.148065	1.31019	0.494485	0.494485	0	54
Xenosaurus_grandis	1.27738	0.783013	0.0543569	1.51167	0.494367	0.494367	0	55
Cebus_olivaceus	1.77844	2.26871	1.54132	2.9961	-0.490272	0.490272	0	56
Panthera_tigris	3.95062	3.46437	2.73518	4.19356	0.48625	0.48625	0	57
Varecia_rubra	1.8423	2.32122	1.5938	3.04864	-0.478922	0.478922	0	58
Platyrrhinus_lineatus	1.40483	0.927169	0.198806	1.65553	0.477665	0.477665	0	59
Osteolaemus_tetraspis	3.25212	2.77863	2.05078	3.50648	0.473495	0.473495	0	60
Emballonura_monticola	0.0253059	0.495778	-0.233569	1.22513	-0.470472	0.470472	0	61
Hipposideros_galeritus	0.0530784	0.52168	-0.207599	1.25096	-0.468601	0.468601	0	62
Mirza_coquereli	1.16791	1.63095	0.903493	2.35841	-0.463043	0.463043	0	63
Perodicticus_potto	1.55991	2.01993	1.2926	2.74727	-0.460027	0.460027	0	64
Batagur_borneoensis	2.16732	2.62721	1.89954	3.35487	-0.459888	0.459888	0	65
Australopithecus_afarensis	3.47562	3.01925	2.29102	3.74748	0.456367	0.456367	0	66
Eophona_migratoria	1.5563	1.10601	0.377955	1.83406	0.450296	0.450296	0	67
Lemur_catta	1.75213	2.18922	1.46186	2.91658	-0.437095	0.437095	0	68
Testudo_horsfieldii	1.25527	1.67523	0.947796	2.40266	-0.419954	0.419954	0	69
Cheirogaleus_medius	1.18752	1.59237	0.864889	2.31986	-0.404854	0.404854	0	70
Neochmia_modesta	0.30103	0.705513	-0.0233156	1.43434	-0.404483	0.404483	0	71
Certhidea_olivacea	0.222716	0.626229	-0.102786	1.35524	-0.403513	0.403513	0	72
Geospiza_fortis	1.24055	0.850319	0.121804	1.57883	0.39023	0.39023	0	73
Mycerobas_affinis	1.57978	1.19188	0.46396	1.9198	0.387903	0.387903	0	74
Neochmia_ruficauda	0.30103	0.682389	-0.046493	1.41127	-0.381359	0.381359	0	75
Crocodylus_porosus	3.95342	3.57962	2.85012	4.30911	0.373804	0.373804	0	76
Trachemys_scripta	1.17609	1.54176	0.814234	2.26928	-0.365668	0.365668	0	77
Pongo_pygmaeus	3.47405	3.10934	2.38095	3.83774	0.364703	0.364703	0	78
Crocodylus_palustris	3.86303	3.50072	2.77144	4.23001	0.362301	0.362301	0	79
Riojasuchus_tenuisceps	2.3652	2.71775	1.98998	3.44553	-0.352557	0.352557	0	80
Carnotaurus_sastrei	3.72214	4.07288	3.34181	4.80395	-0.350742	0.350742	0	81
Crocodylus_siamensis	3.53339	3.18334	2.4548	3.91188	0.35005	0.35005	0	82
Tayassu_pecari	3.30621	2.95954	2.23141	3.68766	0.346671	0.346671	0	83
Micronycteris_hirsuta	1.07262	0.733047	0.00428151	1.46181	0.33957	0.33957	0	84
Kerivoula_intermedia	-0.0409586	0.296906	-0.433004	1.02682	-0.337865	0.337865	0	85
Saara_hardwickii	1.70757	1.37094	0.643249	2.09863	0.33663	0.33663	0	86
Homo_heidelbergensis	2.76518	3.10123	2.37285	3.82961	-0.336058	0.336058	0	87
Neofelis_nebulosa	3.19926	2.86405	2.13608	3.59203	0.335208	0.335208	0	88
Hylobates_lar	2.79162	2.45672	1.72921	3.18423	0.334899	0.334899	0	89
Tonatia_saurophila	1.27416	0.939292	0.210952	1.66763	0.334866	0.334866	0	90
Anolis_valencienni	0.826075	0.491615	-0.237744	1.22097	0.33446	0.33446	0	91
Erophylla_sezekorni	0.447158	0.781308	0.0526489	1.50997	-0.33415	0.33415	0	92
Crocodylus_intermedius	3.79768	3.46354	2.73435	4.19273	0.334143	0.334143	0	93
Rhinolophus_luctus	1.25983	0.927169	0.198806	1.65553	0.332664	0.332664	0	94
Dactyloa_frenata	1.436	1.10433	0.376281	1.83239	0.331669	0.331669	0	95
Staurotypus_triporcatus	2.14301	1.81255	1.08519	2.53992	0.330462	0.330462	0	96
Phyllostomus_discolor	1.33465	1.00494	0.276721	1.73316	0.329713	0.329713	0	97
Serinus_leucopygius	0.30103	0.629717	-0.09929	1.35872	-0.328687	0.328687	0	98
Taeniopygia_bichenovii	0.30103	0.629717	-0.09929	1.35872	-0.328687	0.328687	0	99
Crocodylus_moreletii	3.64335	3.31807	2.58924	4.04691	0.32528	0.32528	0	100
Homo_ergaster	2.76938	3.09029	2.36193	3.81865	-0.320915	0.320915	0	101
Leopardus_pardalis	2.99884	2.67903	1.9513	3.40675	0.319815	0.319815	0	102
Nimbacinus_dicksoni	2.75853	2.44055	1.71306	3.16805	0.317979	0.317979	0	103
Panthera_augusta	3.63044	3.31277	2.58395	4.0416	0.317667	0.317667	0	104
Alligator_mississippiensis	3.70902	3.39184	2.66283	4.12085	0.317173	0.317173	0	105
Myotis_ridleyi	0.139879	0.457005	-0.272447	1.18646	-0.317126	0.317126	0	106
Eulemur_mongoz	1.78269	2.0995	1.37216	2.82684	-0.316811	0.316811	0	107
Crocodylus_novaeguineae	3.72916	3.41528	2.68621	4.14435	0.313885	0.313885	0	108
Mustela_altaica	1.80889	1.49517	0.767604	2.22273	0.313716	0.313716	0	109
Hipposideros_diadema	1.39463	1.08095	0.352859	1.80904	0.313677	0.313677	0	110
Alligator_sinensis	3.03503	2.72254	1.99476	3.45032	0.31249	0.31249	0	111
Homo_neanderthalensis	2.86836	3.18082	2.45228	3.90936	-0.312456	0.312456	0	112
Dasyurus_maculatus	2.57963	2.27168	1.54428	2.99907	0.307956	0.307956	0	113
Eidolon_helvum	1.89154	1.584	0.856508	2.31149	0.307537	0.307537	0	114
Norops_auratus	0.457882	0.154466	-0.57589	0.884822	0.303416	0.303416	0	115
Bassaricyon_gabbii	2.2634	1.96013	1.23279	2.68746	0.303271	0.303271	0	116
Artibeus_lituratus	1.50515	1.204	0.476101	1.93191	0.301146	0.301146	0	117
Anolis_gundlachi	0.822822	0.522518	-0.206758	1.2518	0.300303	0.300303	0	118
Artibeus_jamaicensis	1.39724	1.09831	0.370249	1.82638	0.298933	0.298933	0	119
Platyrrhinus_helleri	1.0607	0.761865	0.0331628	1.49057	0.298833	0.298833	0	120
Anolis_cristatellus	0.876795	0.579347	-0.149784	1.30848	0.297448	0.297448	0	121
Paranthropus_robustus	3.24105	2.94368	2.21558	3.67178	0.297369	0.297369	0	122
Anolis_pulchellus	0.401401	0.104772	-0.625748	0.835292	0.296628	0.296628	0	123
Glossophaga_soricina	0.352183	0.645458	-0.0835107	1.37443	-0.293276	0.293276	0	124
Melanosuchus_niger	3.43072	3.13811	2.40966	3.86656	0.292611	0.292611	0	125
Apalone_ferox	1.62325	1.33278	0.60504	2.06051	0.290473	0.290473	0	126
Mustela_erminea	1.7839	1.49517	0.767604	2.22273	0.288734	0.288734	0	127
Caracal_caracal	2.99537	2.70693	1.97917	3.43469	0.28844	0.28844	0	128
Hypargos_niveoguttatus	0.477121	0.765499	0.0368047	1.49419	-0.288377	0.288377	0	129
Poephila_cincta	0.477121	0.765499	0.0368047	1.49419	-0.288377	0.288377	0	130
Crocodylus_johnsoni	3.11126	2.82558	2.09766	3.5535	0.285682	0.285682	0	131
Panthera_uncia	3.30492	3.0197	2.29147	3.74793	0.285228	0.285228	0	132
Gorilla_gorilla	3.60931	3.32479	2.59594	4.05365	0.284515	0.284515	0	133
Parahyaena_brunnea	3.3137	3.03253	2.30428	3.76078	0.281168	0.281168	0	134
Murina_suilla	0.644439	0.364282	-0.36543	1.09399	0.280157	0.280157	0	135
Serinus_sulphuratus	1.07918	0.799526	0.0709051	1.52815	0.279656	0.279656	0	136
Australopithecus_africanus	3.22571	2.94749	2.21939	3.6756	0.278222	0.278222	0	137
Eupleres_goudotii	2	2.27751	1.55012	3.00491	-0.277512	0.277512	0	138
Macrogalidia_musschenbroekii	2.7332	2.45783	1.73032	3.18534	0.27537	0.27537	0	139
Canis_lupus	3.18971	2.91497	2.18691	3.64302	0.27475	0.27475	0	140
Myotis_nigricans	0.103804	0.37564	-0.354039	1.10532	-0.271837	0.271837	0	141
Mustela_nivalis	1.56585	1.29492	0.567141	2.0227	0.270925	0.270925	0	142
Eptesicus_furinalis	0.863323	0.592786	-0.136311	1.32188	0.270536	0.270536	0	143
Pytilia_hypogrammica	0.477121	0.746854	0.0181188	1.47559	-0.269733	0.269733	0	144
Leopardus_colocolo	2.59528	2.32614	1.59872	3.05356	0.269133	0.269133	0	145
Amadina_erythrocephala	0.60206	0.87034	0.141866	1.59881	-0.26828	0.26828	0	146
Taeniopygia_guttata	0.60206	0.87034	0.141866	1.59881	-0.26828	0.26828	0	147
Terrapene_carolina	1.39794	1.66578	0.938343	2.39322	-0.267839	0.267839	0	148
Felis_margarita	2.49248	2.22484	1.49747	2.95221	0.267641	0.267641	0	149
Kerivoula_papillosa	0.868056	0.600879	-0.128198	1.32996	0.267177	0.267177	0	150
Leptailurus_serval	2.95037	2.68455	1.95682	3.41228	0.26582	0.26582	0	151
Anolis_garmani	1.04336	0.778042	0.0493755	1.50671	0.26532	0.26532	0	152
Panthera_pardus	3.3468	3.0828	2.35446	3.81115	0.263999	0.263999	0	153
Avahi_laniger	1.74523	2.00794	1.28061	2.73528	-0.262714	0.262714	0	154
Dasyurus_viverrinus	2.18099	1.9199	1.19256	2.64724	0.26109	0.26109	0	155
Caiman_crocodilus	3.08458	2.82558	2.09766	3.5535	0.258996	0.258996	0	156
Microcebus_murinus	1.55157	1.2951	0.567314	2.02288	0.256476	0.256476	0	157
Hyperailurictis_validus	3.26685	3.01101	2.2828	3.73922	0.255841	0.255841	0	158
Lepilemur_leucopus	1.56217	1.81733	1.08996	2.54469	-0.255155	0.255155	0	159
Ailurus_fulgens	2.69002	2.43559	1.70809	3.16308	0.254433	0.254433	0	160
Crocodylus_mindorensis	3.43712	3.18334	2.4548	3.91188	0.253775	0.253775	0	161
Rattus_norvegicus	1.88525	1.63185	0.904395	2.35931	0.253396	0.253396	0	162
Paleosuchus_palpebrosus	2.95424	2.70113	1.97338	3.42888	0.253113	0.253113	0	163
Rhinolophus_lepidus	0.247973	0.498975	-0.230363	1.22831	-0.251002	0.251002	0	164
Eira_barbara	2.68735	2.43642	1.70893	3.16391	0.250933	0.250933	0	165
Lophostoma_brasiliense	0.843855	0.596051	-0.133039	1.32514	0.247805	0.247805	0	166
Galago_moholi	1.21958	1.46473	0.737137	2.19233	-0.245147	0.245147	0	167
Centurio_senex	0.612784	0.857498	0.128998	1.586	-0.244715	0.244715	0	168
Hyaena_hyaena	3.25003	3.00634	2.27813	3.73454	0.243694	0.243694	0	169
Xenosmilus_hodsonae	3.3257	3.56769	2.83823	4.29716	-0.241993	0.241993	0	170
Prionailurus_rubiginosus	2.33686	2.09591	1.36857	2.82325	0.24095	0.24095	0	171
Helarctos_malayanus	3.37643	3.13608	2.40764	3.86453	0.240347	0.240347	0	172
Lophocebus_albigena	2.77887	2.53908	1.8115	3.26665	0.239799	0.239799	0	173
Platysternon_megacephalum	1.62325	1.38587	0.658195	2.11354	0.237379	0.237379	0	174
Crocodylus_niloticus	3.4833	3.24697	2.51829	3.97565	0.236334	0.236334	0	175
Arctogalidia_trivirgata	2.44654	2.21305	1.48568	2.94042	0.23349	0.23349	0	176
Propithecus_coquereli	2.1271	2.3599	1.63246	3.08734	-0.232794	0.232794	0	177
Mustela_putorius	2.24551	2.0128	1.28547	2.74013	0.232713	0.232713	0	178
Platyspiza_crassirostris	1.19201	0.959356	0.231053	1.68766	0.232654	0.232654	0	179
Mimon_crenulatum	0.987666	0.755954	0.0272387	1.48467	0.231713	0.231713	0	180
Crocodylus_acutus	3.60195	3.37075	2.64179	4.09971	0.231205	0.231205	0	181
Taxidea_taxus	2.80154	2.5705	1.84289	3.2981	0.231045	0.231045	0	182
Monodelphis_domestica	1.49499	1.26448	0.536663	1.99231	0.230505	0.230505	0	183
Mydaus_javanensis	2.06595	2.29616	1.56875	3.02356	-0.230204	0.230204	0	184
Carduelis_flammea	0.477121	0.705513	-0.0233156	1.43434	-0.228391	0.228391	0	185
Carduelis_spinus	0.477121	0.705513	-0.0233156	1.43434	-0.228391	0.228391	0	186
Lonchura_pallida	0.477121	0.705513	-0.0233156	1.43434	-0.228391	0.228391	0	187
Eulemur_rubriventer	1.92716	2.15454	1.42719	2.88189	-0.227374	0.227374	0	188
Pan_troglodytes	3.28524	3.05985	2.33155	3.78816	0.225388	0.225388	0	189
Pardofelis_marmorata	2.56891	2.34394	1.61651	3.07137	0.224966	0.224966	0	190
Genetta_genetta	2.42259	2.19799	1.47062	2.92535	0.224604	0.224604	0	191
Ornithosuchus_woodwardi	3.85406	3.62998	2.90034	4.35962	0.224077	0.224077	0	192
Caiman_latirostris	3.16643	2.94272	2.21462	3.67082	0.223713	0.223713	0	193
Micronycteris_brachyotis	0.880814	0.657252	-0.0716893	1.38619	0.223562	0.223562	0	194
Ailuropoda_melanoleuca	3.56012	3.33713	2.60825	4.06601	0.222993	0.222993	0	195
Lynx_rufus	2.83965	2.61728	1.88962	3.34493	0.22237	0.22237	0	196
Crocodylus_rhombifer	3.32366	3.10162	2.37324	3.83	0.222041	0.222041	0	197
Bassariscus_sumichrasti	2.36661	2.14556	1.41821	2.87291	0.221053	0.221053	0	198
Coelophysis_bauri	2.46044	2.68136	1.95363	3.40909	-0.220916	0.220916	0	199
Rhinolophus_robinsoni	0.344392	0.565252	-0.163915	1.29442	-0.22086	0.22086	0	200
Didelphis_virginiana	2.64542	2.42509	1.6976	3.15257	0.220335	0.220335	0	201
Camarhynchus_psittacula	1.0026	0.783013	0.0543569	1.51167	0.219585	0.219585	0	202
Carduelis_chloris	1.14613	0.927169	0.198806	1.65553	0.218959	0.218959	0	203
Anolis_oxylophus	0.646404	0.42947	-0.300057	1.159	0.216934	0.216934	0	204
Vulpes_ferrilata	2.63246	2.41925	1.69177	3.14673	0.213207	0.213207	0	205
Micronycteris_minuta	0.338456	0.549672	-0.179534	1.27888	-0.211216	0.211216	0	206
Hipposideros_cervinus	0.206826	0.414652	-0.314917	1.14422	-0.207826	0.207826	0	207
Martes_martes	2.36773	2.16038	1.43302	2.88773	0.207354	0.207354	0	208
Bassaricyon_alleni	2.24304	2.03592	1.30859	2.76326	0.207114	0.207114	0	209
Martes_pennanti	2.56656	2.36062	1.63318	3.08806	0.205933	0.205933	0	210
Lycaon_pictus	3.04673	2.84105	2.11311	3.56899	0.205681	0.205681	0	211
Molossus_sinaloae	1.04961	0.844059	0.115531	1.57259	0.205547	0.205547	0	212
Serinus_mozambicus	0.477121	0.682389	-0.046493	1.41127	-0.205267	0.205267	0	213
Didelphodon_vorax	2.45183	2.24707	1.51969	2.97446	0.204759	0.204759	0	214
Prionailurus_planiceps	2.4627	2.26214	1.53476	2.98953	0.200553	0.200553	0	215
Xenosaurus_platyceps	1.09447	0.894429	0.166002	1.62286	0.200042	0.200042	0	216
Trachops_cirrhosus	1.12287	0.925098	0.196731	1.65347	0.197773	0.197773	0	217
Chiroderma_villosum	1.02694	0.829964	0.101407	1.55852	0.196978	0.196978	0	218
Hipposideros_lylei	1.21245	1.01766	0.289466	1.74586	0.19479	0.19479	0	219
Norops_humilis	0.32838	0.13432	-0.596102	0.864742	0.19406	0.19406	0	220
Phoniscus_jagorii	0.807535	0.614899	-0.114145	1.34394	0.192637	0.192637	0	221
Caiman_yacare	2.98722	2.79514	2.06727	3.52302	0.192077	0.192077	0	222
Eulemur_coronatus	1.91645	2.10655	1.3792	2.83389	-0.190091	0.190091	0	223
Rousettus_aegyptiacus	1.27439	1.46344	0.735849	2.19104	-0.189056	0.189056	0	224
Tyrannosaurus_rex	4.75708	4.57006	3.83699	5.30314	0.187012	0.187012	0	225
Herpestes_ichneumon	2.47276	2.28698	1.55958	3.01438	0.185772	0.185772	0	226
Leopardus_guigna	2.36021	2.17447	1.44711	2.90183	0.185744	0.185744	0	227
Parasuchus_hislopi	3.29192	3.47751	2.74829	4.20674	-0.18559	0.18559	0	228
Cynogale_bennettii	2.58614	2.401	1.67353	3.12847	0.185139	0.185139	0	229
Speothos_venaticus	2.66932	2.48547	1.75794	3.213	0.183849	0.183849	0	230
Cavia_porcellus	1.84379	1.66094	0.933498	2.38838	0.182856	0.182856	0	231
Paleosuchus_trigonatus	3.03423	2.85312	2.12516	3.58107	0.181112	0.181112	0	232
Phyllostomus_elongatus	1.16967	0.988647	0.260398	1.7169	0.181027	0.181027	0	233
Anolis_sheplani	0.00860017	-0.171271	-0.902778	0.560237	0.179871	0.179871	0	234
FAM_62192	3.11279	2.93292	2.20484	3.66101	0.179863	0.179863	0	235
Hipposideros_larvatus	0.973128	0.794017	0.0653842	1.52265	0.179111	0.179111	0	236
Lycalopex_griseus	2.65011	2.4729	1.74538	3.20042	0.17721	0.17721	0	237
Galictis_cuja	2.23452	2.05733	1.33	2.78467	0.177184	0.177184	0	238
Proailurus_lemanensis	2.98541	2.81076	2.08287	3.53866	0.174643	0.174643	0	239
Micronycteris_microtis	0.711807	0.538798	-0.190436	1.26803	0.173009	0.173009	0	240
Caracal_aurata	2.82814	2.65528	1.92759	3.38298	0.172859	0.172859	0	241
Metailurus_parvulus	2.90673	3.0785	2.35016	3.80684	-0.171768	0.171768	0	242
Lutrogale_perspicillata	2.78789	2.6195	1.89184	3.34716	0.168388	0.168388	0	243
Prionailurus_viverrinus	2.78124	2.61504	1.88739	3.3427	0.166203	0.166203	0	244
Melursus_ursinus	3.15351	3.31834	2.5895	4.04717	-0.164827	0.164827	0	245
Nycticebus_coucang	1.67201	1.83568	1.10832	2.56304	-0.163672	0.163672	0	246
Felis_nigripes	2.31275	2.15306	1.42571	2.88041	0.159691	0.159691	0	247
Vulpes_vulpes	2.67943	2.51981	1.79225	3.24737	0.159618	0.159618	0	248
Martes_americana	2.14613	1.98766	1.26033	2.715	0.158465	0.158465	0	249
Anolis_limifrons	0.292256	0.13432	-0.596102	0.864742	0.157936	0.157936	0	250
Propithecus_diadema	2.32471	2.48253	1.75501	3.21006	-0.15782	0.15782	0	251
Fossa_fossana	2.34557	2.18791	1.46055	2.91527	0.15766	0.15766	0	252
Thylacinus_cynocephalus	3.16149	3.00405	2.27584	3.73225	0.157442	0.157442	0	253
Cuon_alpinus	2.9008	2.74375	2.01595	3.47156	0.157052	0.157052	0	254
Uroderma_bilobatum	0.977724	0.821164	0.0925893	1.54974	0.156559	0.156559	0	255
Nandinia_binotata	2.36698	2.21107	1.4837	2.93843	0.155917	0.155917	0	256
Paguma_larvata	2.55047	2.39465	1.66719	3.12211	0.155824	0.155824	0	257
Nycticebus_pygmaeus	1.554	1.70951	0.9821	2.43692	-0.155507	0.155507	0	258
Australopithecus_anamensis	3.22298	3.06808	2.33977	3.7964	0.154894	0.154894	0	259
Pelodiscus_sinensis	1.77085	1.61708	0.889614	2.34455	0.15377	0.15377	0	260
Anolis_distichus	0.447158	0.295531	-0.434383	1.02545	0.151627	0.151627	0	261
Pan_paniscus	3.13977	2.98824	2.26007	3.71641	0.151533	0.151533	0	262
Mustela_lutreola	1.96379	1.81255	1.08519	2.53992	0.151235	0.151235	0	263
Otocolobus_manul	2.49248	2.34198	1.61455	3.06941	0.150504	0.150504	0	264
Tiliqua_scincoides	1.61595	1.7656	1.03822	2.49299	-0.149652	0.149652	0	265
Kerivoula_pellucida	0.264818	0.413433	-0.316139	1.143	-0.148615	0.148615	0	266
Leopardus_geoffroyi	2.52994	2.38151	1.65406	3.10897	0.148428	0.148428	0	267
Tarbosaurus_bataar	4.34955	4.20198	3.47043	4.93353	0.147574	0.147574	0	268
Dromaeosaurus_albertensis	2.88977	2.74247	2.01467	3.47028	0.147304	0.147304	0	269
Nycteris_tragata	0.974512	0.829096	0.100537	1.55765	0.145416	0.145416	0	270
Sarcophilus_harrisii	2.84871	2.70334	1.97559	3.4311	0.145363	0.145363	0	271
Pyrrhula_pyrrhula	0.69897	0.844059	0.115531	1.57259	-0.145089	0.145089	0	272
Vulpes_lagopus	2.59894	2.4541	1.72659	3.1816	0.144841	0.144841	0	273
Lynx_pardinus	2.79771	2.65287	1.92517	3.38056	0.144839	0.144839	0	274
Erythrura_gouldiae	0.60206	0.746854	0.0181188	1.47559	-0.144794	0.144794	0	275
Mecistops_cataphractus	3.31848	3.17484	2.44632	3.90337	0.143637	0.143637	0	276
Atelocynus_microtis	2.77159	2.63105	1.90338	3.35873	0.140533	0.140533	0	277
Sternotherus_odoratus	1.49136	1.63185	0.904395	2.35931	-0.140491	0.140491	0	278
Procyon_cancrivorus	2.67706	2.53701	1.80943	3.26459	0.140049	0.140049	0	279
Noctilio_leporinus	1.29885	1.15951	0.431542	1.88748	0.139343	0.139343	0	280
Tomistoma_schlegelii	3.5311	3.39184	2.66283	4.12085	0.139253	0.139253	0	281
Chrysocyon_brachyurus	3.00928	2.87047	2.14249	3.59846	0.138806	0.138806	0	282
Rhinolophus_stheno	0.454845	0.593115	-0.135982	1.32221	-0.13827	0.13827	0	283
Vulpes_velox	2.45179	2.31367	1.58626	3.04108	0.138115	0.138115	0	284
Sciurus_carolinensis	1.92236	1.78499	1.05761	2.51237	0.137372	0.137372	0	285
Homotherium_nestianus	3.41103	3.54705	2.81764	4.27646	-0.136015	0.136015	0	286
Panthera_leo	3.60718	3.47293	2.74371	4.20214	0.134251	0.134251	0	287
Prionodon_linsang	2.06371	1.92969	1.20235	2.65703	0.134019	0.134019	0	288
Mellivora_capensis	2.80305	2.67069	1.94298	3.39841	0.132356	0.132356	0	289
Pteronura_brasiliensis	3.08941	2.95773	2.22961	3.68585	0.131682	0.131682	0	290
Gulo_gulo	2.84323	2.71515	1.98738	3.44292	0.128087	0.128087	0	291
Martes_flavigula	2.38561	2.25758	1.53019	2.98497	0.128026	0.128026	0	292
Majungasaurus_crenatissimus	3.86308	3.99105	3.26027	4.72183	-0.127969	0.127969	0	293
Bassariscus_astutus	2.24105	2.11342	1.38608	2.84077	0.127624	0.127624	0	294
Cryptoprocta_ferox	2.6807	2.55355	1.82596	3.28115	0.127143	0.127143	0	295
Conepatus_semistriatus	2.2052	2.33018	1.60276	3.05761	-0.124979	0.124979	0	296
Puma_concolor	3.21268	3.08776	2.35941	3.81611	0.124921	0.124921	0	297
Cynictis_penicillata	2.05385	1.92969	1.20235	2.65703	0.124156	0.124156	0	298
Herrerasaurus_ischigualastensis	3.28709	3.1631	2.43459	3.8916	0.123994	0.123994	0	299
Myiopsitta_monachus	1.22376	1.34759	0.619876	2.07531	-0.123839	0.123839	0	300
Ictonyx_striatus	2.15957	2.03592	1.30859	2.76326	0.123643	0.123643	0	301
Panthera_spelaea	3.57191	3.45055	2.7214	4.17971	0.121351	0.121351	0	302
Lycalopex_gymnocercus	2.55023	2.42918	1.70169	3.15667	0.121049	0.121049	0	303
Aonyx_capensis	2.84261	2.7246	1.99681	3.45238	0.118014	0.118014	0	304
Myotis_ater	0.38739	0.505266	-0.224056	1.23459	-0.117876	0.117876	0	305
Amadina_fasciata	0.69897	0.815145	0.0865578	1.54373	-0.116175	0.116175	0	306
Arctictis_binturong	2.84658	2.73068	2.00289	3.45847	0.115907	0.115907	0	307
Oryctolagus_cuniculus	1.97864	2.0942	1.36686	2.82154	-0.115565	0.115565	0	308
Mungos_mungo	2.031	2.14556	1.41821	2.87291	-0.114552	0.114552	0	309
Myotis_simus	0.459392	0.572385	-0.156763	1.30153	-0.112993	0.112993	0	310
Gorgosaurus_libratus	4.14041	4.25268	3.52093	4.98443	-0.112273	0.112273	0	311
Uromastyx_acanthinura	1.77232	1.66094	0.933498	2.38838	0.111384	0.111384	0	312
Megantereon_falconeri	3.07713	3.1875	2.45895	3.91605	-0.110371	0.110371	0	313
Vulpes_zerda	2.11261	2.00265	1.27532	2.72998	0.109957	0.109957	0	314
Daspletosaurus_torosus	4.23599	4.34475	3.61263	5.07686	-0.108756	0.108756	0	315
Martes_foina	2.29623	2.18791	1.46055	2.91527	0.108317	0.108317	0	316
Lontra_felina	2.48287	2.37472	1.64727	3.10217	0.108156	0.108156	0	317
Leopardus_wiedii	2.40932	2.30125	1.57384	3.02866	0.108066	0.108066	0	318
Coelophysis_rhodesiensis	2.59432	2.7023	1.97455	3.43006	-0.107981	0.107981	0	319
Galidia_elegans	2.06744	1.96013	1.23279	2.68746	0.107315	0.107315	0	320
Pardofelis_temminckii	2.79099	2.68514	1.95741	3.41287	0.105849	0.105849	0	321
Potos_flavus	2.40926	2.30505	1.57764	3.03246	0.10421	0.10421	0	322
Pteropus_poliocephalus	1.79934	1.9028	1.17545	2.63014	-0.103456	0.103456	0	323
Homo_sapiens	3.03342	3.13585	2.4074	3.8643	-0.102427	0.102427	0	324
Homotherium_crusafonti	3.22396	3.32585	2.59699	4.0547	-0.101884	0.101884	0	325
Desmodus_rotundus	0.934498	1.03629	0.308119	1.76445	-0.101787	0.101787	0	326
Ursus_arctos	3.57862	3.47914	2.74991	4.20837	0.0994791	0.0994791	0	327
Rhinolophus_trifoliatus	0.823474	0.727128	-0.00165073	1.45591	0.0963459	0.0963459	0	328
Herpestes_fuscus	2.20898	2.11342	1.38608	2.84077	0.0955544	0.0955544	0	329
Lesothosaurus_diagnosticus	2.39734	2.4925	1.76496	3.22003	-0.0951519	0.0951519	0	330
Rhodospiza_obsoleta	0.778151	0.87034	0.141866	1.59881	-0.092189	0.092189	0	331
Noctilio_albiventris	1.07591	0.98487	0.256613	1.71313	0.0910422	0.0910422	0	332
Corucia_zebrata	1.77012	1.6806	0.95317	2.40803	0.0895174	0.0895174	0	333
Lontra_canadensis	2.64286	2.55355	1.82596	3.28115	0.0893055	0.0893055	0	334
Poephila_acuticauda	0.477121	0.565252	-0.163915	1.29442	-0.0881306	0.0881306	0	335
Enhydra_lutris	2.89675	2.98476	2.2566	3.71293	-0.0880174	0.0880174	0	336
Felis_silvestris	2.48458	2.39678	1.66932	3.12424	0.0878036	0.0878036	0	337
Mephitis_mephitis	2.3006	2.21305	1.48568	2.94042	0.0875486	0.0875486	0	338
Rhinolophus_affinis	0.638489	0.725888	-0.00289342	1.45467	-0.0873992	0.0873992	0	339
Canis_latrans	2.83459	2.74725	2.01944	3.47506	0.0873443	0.0873443	0	340
Mauremys_reevesii	1.30103	1.38587	0.658195	2.11354	-0.0848398	0.0848398	0	341
Dasyurus_hallucatus	1.97174	1.88835	1.161	2.61569	0.0833907	0.0833907	0	342
Herpestes_edwardsii	2.17725	2.09591	1.36857	2.82325	0.0813379	0.0813379	0	343
Neovison_vison	2.06819	1.98766	1.26033	2.715	0.080523	0.080523	0	344
Lonchura_punctulata	0.60206	0.682389	-0.046493	1.41127	-0.0803287	0.0803287	0	345
Carpodacus_erythrinus	0.778151	0.857498	0.128998	1.586	-0.0793471	0.0793471	0	346
Padda_oryzivora	1	0.920911	0.192536	1.64929	0.079089	0.079089	0	347
Galerella_pulverulenta	2.03583	2.11342	1.38608	2.84077	-0.0775943	0.0775943	0	348
Pteropus_vampyrus	1.92788	2.00465	1.27731	2.73198	-0.0767616	0.0767616	0	349
Vulpes_rueppellii	2.29929	2.22484	1.49747	2.95221	0.0744492	0.0744492	0	350
Carduelis_sinica	0.90309	0.829964	0.101407	1.55852	0.0731262	0.0731262	0	351
Scotophilus_kuhlii	0.962843	0.889769	0.161333	1.6182	0.0730735	0.0730735	0	352
Carollia_castanea	0.61066	0.682389	-0.046493	1.41127	-0.0717285	0.0717285	0	353
Dogania_subplana	1.5682	1.63808	0.910631	2.36554	-0.069883	0.069883	0	354
Prionailurus_bengalensis	2.40193	2.33234	1.60492	3.05977	0.0695933	0.0695933	0	355
Myotis_albescens	0.338456	0.407883	-0.321705	1.13747	-0.0694263	0.0694263	0	356
Homo_habilis	2.89795	2.96673	2.23859	3.69487	-0.0687832	0.0687832	0	357
Aonyx_cinerea	2.35526	2.28698	1.55958	3.01438	0.0682752	0.0682752	0	358
Mops_mops	0.848805	0.915913	0.187528	1.6443	-0.0671078	0.0671078	0	359
Lonchura_fringilloides	0.69897	0.765499	0.0368047	1.49419	-0.0665287	0.0665287	0	360
Viverra_megaspila	2.65686	2.59167	1.86404	3.3193	0.0651967	0.0651967	0	361
Meles_meles	2.75159	2.68658	1.95884	3.41431	0.0650106	0.0650106	0	362
Canis_aureus	2.63929	2.57496	1.84735	3.30258	0.0643233	0.0643233	0	363
Lutra_lutra	2.63548	2.5715	1.84389	3.29911	0.0639796	0.0639796	0	364
Leopardus_tigrinus	2.2887	2.22484	1.49747	2.95221	0.0638561	0.0638561	0	365
Hapalemur_griseus	1.79782	1.86118	1.13383	2.58854	-0.0633631	0.0633631	0	366
Ursus_thibetanus	3.35629	3.29324	2.56446	4.02202	0.0630568	0.0630568	0	367
Sturnira_lilium	0.887617	0.824569	0.0960013	1.55314	0.0630482	0.0630482	0	368
Homo_erectus	3.03543	3.09827	2.3699	3.82664	-0.0628408	0.0628408	0	369
Cerdocyon_thous	2.55194	2.49051	1.76298	3.21805	0.0614244	0.0614244	0	370
Nyctereutes_procyonoides	2.46509	2.40459	1.67712	3.13206	0.0604984	0.0604984	0	371
Salanoia_concolor	2.02036	1.96013	1.23279	2.68746	0.0602331	0.0602331	0	372
Miracinonyx_studeri	2.98264	2.92279	2.19472	3.65085	0.0598561	0.0598561	0	373
Nasua_nasua	2.42619	2.36689	1.63945	3.09434	0.0592948	0.0592948	0	374
Canis_adustus	2.66876	2.61052	1.88287	3.33817	0.0582431	0.0582431	0	375
Ictonyx_libyca	1.75435	1.81255	1.08519	2.53992	-0.0582048	0.0582048	0	376
Viverricula_indica	2.30578	2.24808	1.5207	2.97546	0.0576991	0.0576991	0	377
Otolemur_crassicaudatus	2.05763	2.0005	1.27317	2.72784	0.0571233	0.0571233	0	378
Pardofelis_badia	2.41756	2.36062	1.63318	3.08806	0.0569407	0.0569407	0	379
Otocyon_megalotis	2.34753	2.40406	1.67659	3.13153	-0.0565381	0.0565381	0	380
Viverra_tangalunga	2.51402	2.45783	1.73032	3.18534	0.0561891	0.0561891	0	381
Puma_yagouaroundi	2.44711	2.50282	1.77527	3.23037	-0.0557144	0.0557144	0	382
Lycalopex_vetulus	2.42651	2.37242	1.64497	3.09987	0.0540914	0.0540914	0	383
Tarsius_syrichta	1.32201	1.37072	0.643027	2.09841	-0.0487059	0.0487059	0	384
Rhinolophus_sedulus	0.503791	0.551572	-0.17763	1.28077	-0.0477809	0.0477809	0	385
Lycalopex_culpaeus	2.71349	2.66571	1.938	3.39342	0.0477802	0.0477802	0	386
Mustela_frenata	1.65896	1.61231	0.884835	2.33978	0.0466586	0.0466586	0	387
Vulpes_chama	2.42813	2.38151	1.65406	3.10897	0.0466198	0.0466198	0	388
Gavialis_gangeticus	3.27761	3.32328	2.59443	4.05213	-0.0456704	0.0456704	0	389
Hipposideros_ridleyi	0.572872	0.617924	-0.111112	1.34696	-0.045052	0.045052	0	390
Tremarctos_ornatus	3.2772	3.32222	2.59337	4.05106	-0.0450196	0.0450196	0	391
Sinraptor_dongi	3.95432	3.99923	3.26843	4.73004	-0.0449105	0.0449105	0	392
Crossarchus_platycephalus	2.10037	2.05733	1.33	2.78467	0.0430372	0.0430372	0	393
Acinonyx_jubatus	3.00783	3.04986	2.32157	3.77814	-0.0420246	0.0420246	0	394
Panthera_atrox	3.70179	3.65979	2.93007	4.38952	0.0420026	0.0420026	0	395
Propithecus_tattersalli	2.35959	2.32122	1.5938	3.04864	0.0383702	0.0383702	0	396
Geospiza_scandens	0.889862	0.851662	0.12315	1.58017	0.0381998	0.0381998	0	397
Nasuella_olivacea	2.10789	2.14556	1.41821	2.87291	-0.0376686	0.0376686	0	398
Ursus_americanus	3.30259	3.33974	2.61085	4.06863	-0.0371492	0.0371492	0	399
Dinofelis_cristata	3.30157	3.33836	2.60947	4.06724	-0.0367882	0.0367882	0	400
Chelydra_serpentina	2.32015	2.35626	1.62882	3.08369	-0.0361093	0.0361093	0	401
Camarhynchus_parvulus	0.661813	0.697171	-0.0316764	1.42602	-0.0353583	0.0353583	0	402
Felis_catus	2.37328	2.3381	1.61067	3.06553	0.0351807	0.0351807	0	403
Cynopterus_brachyotis	1.08991	1.05511	0.326973	1.78324	0.0347982	0.0347982	0	404
Ichneumia_albicauda	2.32098	2.35331	1.62587	3.08074	-0.032331	0.032331	0	405
Civettictis_civetta	2.66521	2.69637	1.96863	3.42412	-0.0311692	0.0311692	0	406
Lutra_sumatrana	2.48173	2.45262	1.72512	3.18013	0.0291076	0.0291076	0	407
Hipposideros_bicolor	0.559907	0.588153	-0.140956	1.31726	-0.0282468	0.0282468	0	408
Genetta_tigrina	2.51433	2.48723	1.7597	3.21476	0.0270947	0.0270947	0	409
Lontra_longicaudis	2.57933	2.55355	1.82596	3.28115	0.0257717	0.0257717	0	410
Felis_chaus	2.58212	2.56036	1.83276	3.28796	0.0217579	0.0217579	0	411
Laudakia_stellio	1.0086	1.03021	0.302034	1.75839	-0.0216104	0.0216104	0	412
Lynx_canadensis	2.65773	2.63666	1.90899	3.36434	0.0210615	0.0210615	0	413
Mephitis_macroura	2.09272	2.11342	1.38608	2.84077	-0.0207035	0.0207035	0	414
Carollia_perspicillata	0.822822	0.802321	0.0737062	1.53094	0.0205009	0.0205009	0	415
Allosaurus_fragilis	3.96374	3.98117	3.25043	4.71192	-0.0174328	0.0174328	0	416
Smilodon_fatalis	3.49971	3.48278	2.75354	4.21202	0.0169289	0.0169289	0	417
Herpestes_auropunctatus	1.97128	1.98766	1.26033	2.715	-0.016387	0.016387	0	418
Hydrictis_maculicollis	2.45271	2.43642	1.70893	3.16391	0.0162886	0.0162886	0	419
Urocyon_cinereoargenteus	2.42846	2.41329	1.68582	3.14077	0.0151651	0.0151651	0	420
Mustela_africana	1.62531	1.61231	0.884835	2.33978	0.0130062	0.0130062	0	421
Rhynchogale_melleri	2.23553	2.22484	1.49747	2.95221	0.0106883	0.0106883	0	422
Ursus_maritimus	3.67202	3.66319	2.93346	4.39293	0.00883101	0.00883101	0	423
Geospiza_fuliginosa	0.720986	0.729592	0.000818756	1.45837	-0.00860657	0.00860657	0	424
Erythrura_trichroa	0.69897	0.705513	-0.0233156	1.43434	-0.00654266	0.00654266	0	425
Crocuta_crocuta	3.34143	3.34773	2.61883	4.07664	-0.0062973	0.0062973	0	426
Taphozous_melanopogon	0.89098	0.886581	0.158139	1.61502	0.00439879	0.00439879	0	427
Canis_mesomelas	2.57403	2.57838	1.85077	3.306	-0.00435162	0.00435162	0	428
Symphalangus_syndactylus	2.64444	2.64861	1.92092	3.3763	-0.00417025	0.00417025	0	429
Paradoxurus_hermaphroditus	2.39164	2.39465	1.66719	3.12211	-0.00300813	0.00300813	0	430
Bdeogale_crassicauda	2.25624	2.25758	1.53019	2.98497	-0.00134369	0.00134369	0	431
Procyon_lotor	2.54827	2.54745	1.81986	3.27503	0.000818441	0.000818441	0	432
Lynx_lynx	2.82292	2.82219	2.09428	3.5501	0.000731183	0.000731183	0	433
Viverra_zibetha	2.58501	2.5851	1.85748	3.31273	-9.24062e-05	9.24062e-05	0	434

## Sheet: HEADERS
Header	Description
ID	Taxon ID
Taxon	Taxon name
Rank_Phylo	Rank based on the magnitude of the rate scalars estimated through VR phylogenetic regression
Signif_Phylo	"Significant" rate scalars - i.e., rate scalar > 2 and Pct time scaled > 95
log10_RateScalar	log10 transformed rate scalars
Rank_nonPhylo	Rank based on the magnitude of the residuals from standard non-phylogenetic regression
Signif_nonPhylo	"Significant" residuals - i.e., outside of 95% prediction intervals
F_Bite_Resid	Residual bite force from non-phylogenetic regression
Rank_nonPhylo5Group	Rank based on the magnitude of the residuals from standard non-phylogenetic regression with group-wise parameters
Signif_nonPhylo5Group	"Significant" residuals - i.e., outside of 95% prediction intervals for 5-Group non-phylo regression model
F_Bite_Resid	Residual bite force from 5-Group non-phylogenetic regression

## Sheet: Table_S3
		Phylogenetic VR			nonPhylo			nonPhylo-5Group
ID	Taxon	Rank_Phylo	Signif_Phylo	log10_RateScalar	Rank_nonPhylo	Signif_nonPhylo	F_Bite_Resid	Rank_nonPhylo5Group	Signif_nonPhylo5Group	F_Bite_Resid
265	Saimiri_sciureus	32	1	0.885283	6	1	1.27194	1	1	1.26105
258	Callicebus_torquatus	41	1	0.824053	9	1	1.194	2	1	1.1989
393	Dromaius_novaehollandiae	66	1	0.607589	1	1	2.01678	3	1	1.14464
324	Plateosaurus_engelhardti	20	1	1.54739	3	1	1.48061	4	1	1.0742
409	Chelus_fimbriata	409	0	0	11	1	1.00004	5	1	1.01532
372	Geospiza_magnirostris	1	1	2.94237	12	1	0.969996	6	1	0.917386
165	Sus_scrofa	23	1	1.15342	22	1	0.76918	7	1	0.904636
323	Stegosaurus_stenops	24	1	1.07908	5	1	1.27451	8	1	0.868515
336	Erlikosaurus_andrewsi	64	1	0.619449	7	1	1.2629	9	1	0.856143
261	Callithrix_argentata	42	1	0.808813	18	1	0.872936	10	1	0.841416
411	Gallotia_galloti	411	0	0	16	1	0.898156	11	1	0.778831
338	Archaeopteryx_lithographica	61	1	0.625799	14	1	0.938093	12	1	0.777896
260	Callithrix_jacchus	47	1	0.801378	20	1	0.787718	13	1	0.753635
351	Myiopsitta_monachus	89	1	0.586287	300	0	0.123839	14	1	0.750621
392	Struthio_camelus	75	1	0.59619	2	1	1.59888	15	1	0.727221
266	Ateles_geoffroyi	43	1	0.80541	30	0	0.659078	16	1	0.715377
263	Aotus_trivirgatus	48	1	0.79638	25	0	0.716713	17	1	0.707747
365	Cactospiza_pallida	3	1	1.87143	29	0	0.662594	18	1	0.692062
255	Colobus_polykomos	29	1	0.888451	34	0	0.627788	19	1	0.689465
410	Pelomedusa_subrufa	410	0	0	35	0	0.62482	20	1	0.671812
320	Riojasuchus_tenuisceps	51	0	0.698296	80	0	0.352557	21	1	0.643447
262	Callimico_goeldii	46	1	0.80279	28	0	0.663154	22	1	0.640669
100	Proteles_cristatus	22	1	1.16119	27	0	0.692745	23	1	0.625
254	Piliocolobus_rufomitratus	30	1	0.887571	44	0	0.563059	24	1	0.624736
267	Alouatta_guariba	44	1	0.804096	43	0	0.567098	25	1	0.61458
337	Dromaeosaurus_albertensis	67	1	0.60652	269	0	0.147304	26	1	0.612734
201	Monophyllus_redmani	131	0	0.492235	45	0	0.559385	27	1	0.595321
335	Tyrannosaurus_rex	109	0	0.568547	225	0	0.187012	28	0	0.592519
334	Tarbosaurus_bataar	108	0	0.57008	268	0	0.147574	29	0	0.588809
394	Rhea_americana	84	1	0.588429	4	1	1.45434	30	0	0.582034
259	Saguinus_fuscicollis	45	1	0.80279	38	0	0.604531	31	0	0.57301
289	Dasyurus_hallucatus	365	0	0	342	0	0.0833907	32	0	0.556363
292	Sarcophilus_harrisii	368	0	0	271	0	0.145363	33	0	0.537638
221	Murina_aenea	135	0	0.480191	48	0	0.541525	34	0	0.536659
325	Herrerasaurus_ischigualastensis	112	0	0.561592	299	0	0.123994	35	0	0.5315
264	Cebus_olivaceus	38	1	0.833456	56	0	0.490272	36	0	0.519336
276	Varecia_rubra	354	0	0	58	0	0.478922	37	0	0.513185
257	Macaca_fascicularis	27	1	0.918312	46	0	0.554414	38	0	0.512443
426	Anolis_equestris	426	0	0	32	0	0.633261	39	0	0.512038
405	Macrochelys_temminckii	405	0	0	52	0	0.51204	40	0	0.494456
222	Murina_cyclotis	136	0	0.477509	54	0	0.494485	41	0	0.484426
242	Paranthropus_boisei	10	1	1.68895	40	0	0.580455	42	0	0.48
173	Hipposideros_galeritus	338	0	0	62	0	0.468601	43	0	0.466314
282	Perodicticus_potto	358	0	0	64	0	0.460027	44	0	0.464459
186	Emballonura_monticola	347	0	0	61	0	0.470472	45	0	0.4628
277	Lemur_catta	221	0	0.0829824	68	0	0.437095	46	0	0.458288
248	Homo_heidelbergensis	13	1	1.65439	87	0	0.336058	47	0	0.447554
129	Panthera_onca	28	1	0.896748	42	0	0.573969	48	0	0.446136
330	Sinraptor_dongi	115	0	0.545649	392	0	0.0449105	49	0	0.442319
399	Testudo_horsfieldii	399	0	0	69	0	0.419954	50	0	0.439649
249	Homo_neanderthalensis	17	1	1.64851	112	0	0.312456	51	0	0.431833
246	Homo_ergaster	11	1	1.67087	101	0	0.320915	52	0	0.431329
273	Mirza_coquereli	54	0	0.6612	63	0	0.463043	53	0	0.42896
203	Lophostoma_silvicolum	172	0	0.418689	53	0	0.499931	54	0	0.412456
403	Trachemys_scripta	403	0	0	77	0	0.365668	55	0	0.410094
122	Xenosmilus_hodsonae	201	0	0.390891	170	0	0.241993	56	0	0.399676
331	Allosaurus_fragilis	113	0	0.546912	416	0	0.0174328	57	0	0.397776
194	Platyrrhinus_lineatus	138	0	0.472478	59	0	0.477665	58	0	0.395642
182	Pteropus_poliocephalus	175	0	0.414621	323	0	0.103456	59	0	0.388333
205	Phyllostomus_hastatus	156	0	0.441436	47	0	0.543521	60	0	0.386268
202	Erophylla_sezekorni	150	0	0.455323	92	0	0.33415	61	0	0.385846
181	Pteropus_vampyrus	174	0	0.414621	349	0	0.0767616	62	0	0.382815
184	Rousettus_aegyptiacus	129	0	0.501247	224	0	0.189056	63	0	0.382582
370	Geospiza_fortis	8	1	1.78656	73	0	0.39023	64	0	0.380707
349	Accipiter_striatus	92	1	0.58457	8	1	1.24241	65	0	0.368014
275	Cheirogaleus_medius	143	0	0.46657	70	0	0.404854	66	0	0.366951
60	Mustela_altaica	281	0	0	109	0	0.313716	67	0	0.361244
251	Australopithecus_afarensis	19	1	1.55602	66	0	0.456367	68	0	0.352988
357	Serinus_sulphuratus	53	1	0.66408	136	0	0.279656	69	0	0.344231
416	Anolis_chloris	416	0	0	31	0	0.646712	70	0	0.339054
126	Panthera_tigris	121	0	0.531329	57	0	0.48625	71	0	0.338797
59	Mustela_nivalis	280	0	0	142	0	0.270925	72	0	0.338281
235	Oryctolagus_cuniculus	352	0	0	308	0	0.115565	73	0	0.337024
63	Mustela_erminea	284	0	0	127	0	0.288734	74	0	0.336262
396	Staurotypus_triporcatus	396	0	0	96	0	0.330462	75	0	0.336214
321	Parasuchus_hislopi	395	0	0	228	0	0.18559	76	0	0.335697
280	Eulemur_mongoz	356	0	0	107	0	0.316811	77	0	0.329121
274	Microcebus_murinus	26	0	0.918377	157	0	0.256476	78	0	0.323814
97	Crocuta_crocuta	311	0	0	426	0	0.0062973	79	0	0.322174
387	Poephila_acuticauda	21	1	1.30296	335	0	0.0881306	80	0	0.318209
377	Uraeginthus_bengalus	70	1	0.599343	33	0	0.629717	81	0	0.31742
200	Glossophaga_soricina	144	0	0.466019	124	0	0.293276	82	0	0.316725
223	Murina_suilla	140	0	0.470566	135	0	0.280157	83	0	0.31517
322	Lesothosaurus_diagnosticus	56	0	0.638547	330	0	0.0951519	84	0	0.313307
191	Centurio_senex	123	0	0.526308	168	0	0.244715	85	0	0.312252
328	Majungasaurus_crenatissimus	118	0	0.539918	293	0	0.127969	86	0	0.309867
431	Xenosaurus_grandis	431	0	0	55	0	0.494367	87	0	0.309346
367	Camarhynchus_psittacula	7	1	1.78692	202	0	0.219585	88	0	0.30825
96	Eupleres_goudotii	33	0	0.872038	138	0	0.277512	89	0	0.307448
378	Amadina_erythrocephala	62	1	0.625799	146	0	0.26828	90	0	0.307011
389	Taeniopygia_guttata	58	1	0.629002	147	0	0.26828	91	0	0.307011
350	Accipiter_cooperii	88	1	0.586287	10	1	1.17898	92	0	0.304981
33	Bassaricyon_gabbii	254	0	0	116	0	0.303271	93	0	0.304761
401	Batagur_borneoensis	401	0	0	65	0	0.459888	94	0	0.303182
225	Myotis_ridleyi	161	0	0.430906	106	0	0.317126	95	0	0.301391
287	Monodelphis_domestica	363	0	0	183	0	0.230505	96	0	0.300874
327	Coelophysis_rhodesiensis	120	0	0.537744	319	0	0.107981	97	0	0.300179
212	Micronycteris_hirsuta	147	0	0.458189	84	0	0.33957	98	0	0.297909
78	Melursus_ursinus	152	0	0.44972	245	0	0.164827	99	0	0.29782
332	Gorgosaurus_libratus	111	0	0.566621	311	0	0.112273	100	0	0.293685
121	Homotherium_nestianus	213	0	0.364469	286	0	0.136015	101	0	0.291654
402	Terrapene_carolina	402	0	0	148	0	0.267839	102	0	0.289285
218	Kerivoula_intermedia	79	0	0.592054	85	0	0.337865	103	0	0.288842
233	Rattus_norvegicus	350	0	0	162	0	0.253396	104	0	0.28739
252	Hylobates_lar	37	1	0.833456	89	0	0.334899	105	0	0.287219
347	Geranoaetus_melanoleucus	72	1	0.59698	39	0	0.588015	106	0	0.285111
333	Daspletosaurus_torosus	107	0	0.57104	315	0	0.108756	107	0	0.282268
117	Metailurus_parvulus	210	0	0.368432	242	0	0.171768	108	0	0.281014
291	Dasyurus_maculatus	367	0	0	113	0	0.307956	109	0	0.278598
294	Nimbacinus_dicksoni	370	0	0	103	0	0.317979	110	0	0.271899
269	Propithecus_coquereli	124	0	0.522334	177	0	0.232794	111	0	0.270887
290	Dasyurus_viverrinus	366	0	0	155	0	0.26109	112	0	0.266563
271	Avahi_laniger	222	0	0.0527486	154	0	0.262714	113	0	0.265958
68	Mydaus_javanensis	289	0	0	184	0	0.230204	114	0	0.261986
229	Eptesicus_furinalis	173	0	0.415223	143	0	0.270536	115	0	0.258039
219	Kerivoula_papillosa	110	0	0.567387	150	0	0.267177	116	0	0.252997
237	Pongo_pygmaeus	40	1	0.824245	78	0	0.364703	117	0	0.252403
344	Falco_mexicanus	101	1	0.577319	36	0	0.622447	118	0	0.251424
195	Platyrrhinus_helleri	141	0	0.468271	120	0	0.298833	119	0	0.25118
172	Rhinolophus_luctus	337	0	0	94	0	0.332664	120	0	0.250641
209	Tonatia_saurophila	181	0	0.411551	90	0	0.334866	121	0	0.250322
140	Leopardus_pardalis	157	0	0.439579	102	0	0.319815	122	0	0.250123
164	Tayassu_pecari	330	0	0	83	0	0.346671	123	0	0.249204
125	Neofelis_nebulosa	165	0	0.423741	88	0	0.335208	124	0	0.247196
279	Eulemur_rubriventer	355	0	0	188	0	0.227374	125	0	0.245133
168	Rhinolophus_lepidus	333	0	0	164	0	0.251002	126	0	0.243995
156	Felis_margarita	177	0	0.413724	149	0	0.267641	127	0	0.24292
305	Crocodylus_porosus	381	0	0	76	0	0.373804	128	0	0.242617
272	Lepilemur_leucopus	220	0	0.107751	159	0	0.255155	129	0	0.239525
226	Myotis_nigricans	160	0	0.438746	141	0	0.271837	130	0	0.239185
123	Homotherium_crusafonti	207	0	0.374644	325	0	0.101884	131	0	0.235621
204	Lophostoma_brasiliense	178	0	0.412394	166	0	0.247805	132	0	0.234628
142	Leopardus_colocolo	164	0	0.424444	145	0	0.269133	133	0	0.234381
207	Phyllostomus_discolor	171	0	0.420145	97	0	0.329713	134	0	0.231519
120	Megantereon_falconeri	208	0	0.374395	313	0	0.110371	135	0	0.230409
160	Prionailurus_rubiginosus	198	0	0.39442	171	0	0.24095	136	0	0.228995
61	Mustela_putorius	282	0	0	178	0	0.232713	137	0	0.228987
166	Rhinolophus_robinsoni	331	0	0	200	0	0.22086	138	0	0.227632
105	Macrogalidia_musschenbroekii	318	0	0	139	0	0.27537	139	0	0.22758
297	Gavialis_gangeticus	373	0	0	389	0	0.0456704	140	0	0.224357
247	Homo_sapiens	16	1	1.65073	324	0	0.102427	141	0	0.217352
304	Crocodylus_palustris	380	0	0	79	0	0.362301	142	0	0.216494
139	Caracal_caracal	194	0	0.400929	128	0	0.28844	143	0	0.215985
213	Micronycteris_minuta	137	0	0.472517	206	0	0.211216	144	0	0.214749
232	Cavia_porcellus	349	0	0	231	0	0.182856	145	0	0.21397
103	Arctogalidia_trivirgata	316	0	0	176	0	0.23349	146	0	0.209937
67	Ailurus_fulgens	288	0	0	160	0	0.254433	147	0	0.208846
270	Propithecus_diadema	212	0	0.364845	251	0	0.15782	148	0	0.208056
407	Apalone_ferox	407	0	0	126	0	0.290473	149	0	0.207323
215	Desmodus_rotundus	203	0	0.385627	326	0	0.101787	150	0	0.206498
427	Dactyloa_frenata	427	0	0	95	0	0.331669	151	0	0.206188
35	Eira_barbara	256	0	0	165	0	0.250933	152	0	0.205263
29	Bassariscus_sumichrasti	250	0	0	198	0	0.221053	153	0	0.204183
413	Saara_hardwickii	413	0	0	86	0	0.33663	154	0	0.203824
281	Eulemur_coronatus	357	0	0	223	0	0.190091	155	0	0.203099
391	Neochmia_modesta	82	1	0.588956	71	0	0.404483	156	0	0.202759
109	Genetta_genetta	322	0	0	191	0	0.224604	157	0	0.202543
243	Paranthropus_robustus	14	1	1.65173	122	0	0.297369	158	0	0.201473
34	Bassaricyon_alleni	255	0	0	209	0	0.207114	159	0	0.201099
176	Hipposideros_diadema	341	0	0	110	0	0.313677	160	0	0.199679
214	Micronycteris_brachyotis	168	0	0.421931	194	0	0.223562	161	0	0.197661
137	Leptailurus_serval	199	0	0.393423	151	0	0.26582	162	0	0.195581
382	Erythrura_trichroa	69	1	0.599343	425	0	0.00654266	163	0	0.195181
286	Galago_moholi	362	0	0	167	0	0.245147	164	0	0.194605
309	Osteolaemus_tetraspis	385	0	0	60	0	0.473495	165	0	0.193885
38	Martes_martes	259	0	0	208	0	0.207354	166	0	0.189016
134	Pardofelis_marmorata	205	0	0.380796	190	0	0.224966	167	0	0.188453
49	Enhydra_lutris	270	0	0	336	0	0.0880174	168	0	0.187982
326	Coelophysis_bauri	117	0	0.539918	199	0	0.220916	169	0	0.187274
412	Tupinambis_merianae	412	0	0	37	0	0.611766	170	0	0.186459
208	Mimon_crenulatum	179	0	0.412394	180	0	0.231713	171	0	0.185289
128	Panthera_augusta	57	0	0.630176	104	0	0.317667	172	0	0.185225
256	Lophocebus_albigena	31	1	0.885604	173	0	0.239799	173	0	0.183964
174	Hipposideros_cervinus	339	0	0	207	0	0.207826	174	0	0.183285
425	Anolis_sheplani	425	0	0	234	0	0.179871	175	0	0.181978
244	Australopithecus_africanus	18	1	1.63762	137	0	0.278222	176	0	0.181948
127	Panthera_uncia	132	0	0.482875	132	0	0.285228	177	0	0.181804
14	Canis_lupus	52	0	0.67755	140	0	0.27475	178	0	0.181696
301	Crocodylus_intermedius	377	0	0	93	0	0.334143	179	0	0.181446
193	Artibeus_jamaicensis	146	0	0.459257	119	0	0.298933	180	0	0.181325
368	Camarhynchus_parvulus	6	1	1.78739	402	0	0.0353583	181	0	0.178535
79	Tremarctos_ornatus	294	0	0	391	0	0.0450196	182	0	0.178397
295	Didelphodon_vorax	371	0	0	214	0	0.204759	183	0	0.177837
99	Parahyaena_brunnea	313	0	0	134	0	0.281168	184	0	0.176474
288	Didelphis_virginiana	364	0	0	201	0	0.220335	185	0	0.175787
220	Phoniscus_jagorii	139	0	0.471109	221	0	0.192637	186	0	0.175541
376	Hypargos_niveoguttatus	76	1	0.594791	129	0	0.288377	187	0	0.174163
386	Poephila_cincta	50	1	0.720108	130	0	0.288377	188	0	0.174163
250	Homo_erectus	12	1	1.65522	369	0	0.0628408	189	0	0.174044
74	Ursus_americanus	130	0	0.498645	399	0	0.0371492	190	0	0.172262
161	Prionailurus_planiceps	195	0	0.4001	215	0	0.200553	191	0	0.172139
66	Taxidea_taxus	287	0	0	182	0	0.231045	192	0	0.1721
118	Dinofelis_cristata	216	0	0.356659	400	0	0.0367882	193	0	0.171764
211	Micronycteris_microtis	149	0	0.456102	240	0	0.173009	194	0	0.171736
341	Larus_fuscus	102	1	0.57731	26	0	0.70222	195	0	0.171494
18	Vulpes_ferrilata	239	0	0	205	0	0.213207	196	0	0.169237
53	Galictis_cuja	274	0	0	238	0	0.177184	197	0	0.169049
397	Sternotherus_odoratus	397	0	0	278	0	0.140491	198	0	0.168223
40	Martes_pennanti	261	0	0	210	0	0.205933	199	0	0.167768
62	Mustela_lutreola	283	0	0	263	0	0.151235	200	0	0.167337
245	Homo_habilis	15	1	1.65073	357	0	0.0687832	201	0	0.166962
145	Leopardus_guigna	153	0	0.446961	227	0	0.185744	202	0	0.166011
398	Platysternon_megacephalum	398	0	0	174	0	0.237379	203	0	0.164067
192	Artibeus_lituratus	148	0	0.457621	117	0	0.301146	204	0	0.161563
415	Laudakia_stellio	415	0	0	412	0	0.0216104	205	0	0.160826
71	Conepatus_semistriatus	292	0	0	296	0	0.124979	206	0	0.160131
146	Lynx_rufus	196	0	0.398677	196	0	0.22237	207	0	0.158792
77	Ursus_maritimus	145	0	0.463518	423	0	0.00883101	208	0	0.158308
400	Mauremys_reevesii	400	0	0	341	0	0.0848398	209	0	0.158152
373	Geospiza_fuliginosa	4	1	1.86856	424	0	0.00860657	210	0	0.157989
37	Martes_americana	258	0	0	249	0	0.158465	211	0	0.157229
234	Sciurus_carolinensis	351	0	0	285	0	0.137372	212	0	0.156204
384	Lonchura_punctulata	65	1	0.609877	345	0	0.0803287	213	0	0.155129
85	Herpestes_ichneumon	300	0	0	226	0	0.185772	214	0	0.154898
130	Panthera_pardus	126	0	0.519961	153	0	0.263999	215	0	0.154327
116	Hyperailurictis_validus	329	0	0	158	0	0.255841	216	0	0.153278
346	Falco_sparverius	104	1	0.577276	24	0	0.721222	217	0	0.153275
432	Tiliqua_scincoides	432	0	0	265	0	0.149652	218	0	0.1526
306	Crocodylus_novaeguineae	382	0	0	108	0	0.313885	219	0	0.152246
318	Alligator_mississippiensis	394	0	0	105	0	0.317173	220	0	0.151191
238	Gorilla_gorilla	39	1	0.82767	133	0	0.284515	221	0	0.150882
169	Rhinolophus_stheno	334	0	0	283	0	0.13827	222	0	0.150836
284	Nycticebus_coucang	360	0	0	246	0	0.163672	223	0	0.149859
150	Acinonyx_jubatus	190	0	0.40281	394	0	0.0420246	224	0	0.148435
421	Anolis_limifrons	421	0	0	250	0	0.157936	225	0	0.147287
231	Mops_mops	214	0	0.361435	359	0	0.0671078	226	0	0.14679
390	Neochmia_ruficauda	78	1	0.592826	75	0	0.381359	227	0	0.145901
298	Crocodylus_moreletii	374	0	0	100	0	0.32528	228	0	0.145629
363	Pyrrhula_pyrrhula	100	1	0.579509	272	0	0.145089	229	0	0.14548
303	Crocodylus_siamensis	379	0	0	82	0	0.35005	230	0	0.145432
102	Cynogale_bennettii	315	0	0	229	0	0.185139	231	0	0.142976
155	Felis_nigripes	193	0	0.401439	247	0	0.159691	232	0	0.142078
98	Hyaena_hyaena	312	0	0	169	0	0.243694	233	0	0.141594
230	Molossus_sinaloae	211	0	0.364907	212	0	0.205547	234	0	0.140804
101	Prionodon_linsang	314	0	0	288	0	0.134019	235	0	0.138522
343	Falco_peregrinus	105	1	0.575029	23	1	0.735916	236	0	0.137833
95	Fossa_fossana	310	0	0	252	0	0.15766	237	0	0.136596
197	Chiroderma_villosum	154	0	0.445269	218	0	0.196978	238	0	0.135166
5	Speothos_venaticus	227	0	0	230	0	0.183849	239	0	0.133322
80	Nandinia_binotata	295	0	0	256	0	0.155917	240	0	0.13256
119	Smilodon_fatalis	206	0	0.378024	417	0	0.0169289	241	0	0.132347
81	Mungos_mungo	296	0	0	309	0	0.114552	242	0	0.131423
364	Rhodospiza_obsoleta	97	1	0.582958	331	0	0.092189	243	0	0.13092
283	Nycticebus_pygmaeus	359	0	0	258	0	0.155507	244	0	0.129202
83	Cynictis_penicillata	298	0	0	298	0	0.124156	245	0	0.12866
375	Pytilia_hypogrammica	77	1	0.593547	144	0	0.269733	246	0	0.128318
9	Lycalopex_griseus	231	0	0	237	0	0.17721	247	0	0.127927
170	Rhinolophus_affinis	335	0	0	339	0	0.0873992	248	0	0.127572
75	Helarctos_malayanus	73	0	0.596661	172	0	0.240347	249	0	0.125399
133	Panthera_atrox	116	0	0.543335	395	0	0.0420026	250	0	0.1248
178	Hipposideros_larvatus	343	0	0	236	0	0.179111	251	0	0.124774
217	Kerivoula_pellucida	128	0	0.515747	266	0	0.148615	252	0	0.123821
420	Anolis_distichus	420	0	0	261	0	0.151627	253	0	0.123724
408	Pelodiscus_sinensis	408	0	0	260	0	0.15377	254	0	0.123302
228	Myotis_simus	166	0	0.422621	310	0	0.112993	255	0	0.121249
4	Lycaon_pictus	226	0	0	211	0	0.205681	256	0	0.119946
354	Mycerobas_affinis	93	1	0.583261	74	0	0.387903	257	0	0.1199
239	Pan_troglodytes	35	1	0.837599	189	0	0.225388	258	0	0.117988
434	Sphenodon_punctatus	434	0	0	41	0	0.579035	259	0	0.117731
55	Ictonyx_striatus	276	0	0	301	0	0.123643	260	0	0.117628
210	Trachops_cirrhosus	183	0	0.409002	217	0	0.197773	261	0	0.11618
106	Paguma_larvata	319	0	0	257	0	0.155824	262	0	0.11429
159	Otocolobus_manul	200	0	0.393423	264	0	0.150504	263	0	0.114185
30	Bassariscus_astutus	251	0	0	294	0	0.127624	264	0	0.113935
224	Myotis_ater	163	0	0.425656	305	0	0.117876	265	0	0.112176
428	Norops_humilis	428	0	0	220	0	0.19406	266	0	0.111164
93	Galidia_elegans	308	0	0	320	0	0.107315	267	0	0.108805
144	Leopardus_geoffroyi	158	0	0.439579	267	0	0.148428	268	0	0.108195
151	Puma_yagouaroundi	176	0	0.414368	382	0	0.0557144	269	0	0.107959
23	Vulpes_zerda	244	0	0	314	0	0.109957	270	0	0.107236
19	Vulpes_vulpes	240	0	0	248	0	0.159618	271	0	0.105691
138	Caracal_aurata	197	0	0.39442	241	0	0.172859	272	0	0.105518
22	Vulpes_velox	243	0	0	284	0	0.138115	273	0	0.104599
45	Lutrogale_perspicillata	266	0	0	243	0	0.168388	274	0	0.10459
199	Carollia_castanea	170	0	0.421764	353	0	0.0717285	275	0	0.102857
163	Prionailurus_viverrinus	191	0	0.402084	244	0	0.166203	276	0	0.102847
113	Civettictis_civetta	326	0	0	406	0	0.0311692	277	0	0.102579
319	Ornithosuchus_woodwardi	49	0	0.736014	192	0	0.224077	278	0	0.102221
36	Martes_flavigula	257	0	0	292	0	0.128026	279	0	0.100064
362	Carpodacus_erythrinus	96	1	0.582958	346	0	0.0793471	280	0	0.0993442
17	Otocyon_megalotis	238	0	0	380	0	0.0565381	281	0	0.0990045
21	Vulpes_lagopus	242	0	0	273	0	0.144841	282	0	0.0974209
361	Carduelis_chloris	91	1	0.586149	203	0	0.218959	283	0	0.0973248
196	Uroderma_bilobatum	151	0	0.454185	255	0	0.156559	284	0	0.096577
406	Dogania_subplana	406	0	0	354	0	0.069883	285	0	0.0964599
424	Anolis_valencienni	424	0	0	91	0	0.33446	286	0	0.0954432
179	Hipposideros_lylei	344	0	0	219	0	0.19479	287	0	0.093951
360	Carduelis_sinica	95	1	0.582958	351	0	0.0731262	288	0	0.0932975
115	Proailurus_lemanensis	328	0	0	239	0	0.174643	289	0	0.0919072
340	Gallus_gallus	94	1	0.582958	13	1	0.965237	290	0	0.0915754
91	Galerella_pulverulenta	306	0	0	348	0	0.0775943	291	0	0.091283
345	Falco_columbarius	106	1	0.575029	21	1	0.783035	292	0	0.0912676
414	Uromastyx_acanthinura	414	0	0	312	0	0.111384	293	0	0.0890419
183	Eidolon_helvum	127	0	0.517682	114	0	0.307537	294	0	0.0889448
72	Ailuropoda_melanoleuca	293	0	0	195	0	0.222993	295	0	0.0881387
39	Martes_foina	260	0	0	316	0	0.108317	296	0	0.0872527
206	Phyllostomus_elongatus	155	0	0.44425	233	0	0.181027	297	0	0.0862216
369	Certhidea_olivacea	9	1	1.77988	72	0	0.403513	298	0	0.0861282
124	FAM_62192	218	0	0.346013	235	0	0.179863	299	0	0.0850315
312	Paleosuchus_trigonatus	388	0	0	232	0	0.181112	300	0	0.0846959
315	Caiman_yacare	391	0	0	222	0	0.192077	301	0	0.0844735
27	Procyon_cancrivorus	248	0	0	279	0	0.140049	302	0	0.0844189
342	Cariama_cristata	103	1	0.57731	19	1	0.789016	303	0	0.0844077
187	Nycteris_tragata	348	0	0	270	0	0.145416	304	0	0.0837844
149	Lynx_lynx	182	0	0.409247	433	0	0.000731183	305	0	0.0831362
57	Mustela_frenata	278	0	0	387	0	0.0466586	306	0	0.0825881
88	Herpestes_fuscus	303	0	0	329	0	0.0955544	307	0	0.0818657
3	Cuon_alpinus	225	0	0	254	0	0.157052	308	0	0.0809513
316	Melanosuchus_niger	392	0	0	125	0	0.292611	309	0	0.0796122
423	Anolis_garmani	423	0	0	152	0	0.26532	310	0	0.079378
58	Neovison_vison	279	0	0	344	0	0.080523	311	0	0.0792866
148	Lynx_pardinus	185	0	0.404561	274	0	0.144839	312	0	0.0777369
8	Lycalopex_gymnocercus	230	0	0	303	0	0.121049	313	0	0.0760955
141	Leopardus_wiedii	162	0	0.426468	318	0	0.108066	314	0	0.0757792
11	Atelocynus_microtis	233	0	0	277	0	0.140533	315	0	0.0755907
419	Anolis_cristatellus	419	0	0	121	0	0.297448	316	0	0.0746877
379	Amadina_fasciata	59	1	0.628834	306	0	0.116175	317	0	0.0743867
180	Cynopterus_brachyotis	345	0	0	404	0	0.0347982	318	0	0.0738259
26	Potos_flavus	247	0	0	322	0	0.10421	319	0	0.0715478
253	Symphalangus_syndactylus	36	1	0.837599	429	0	0.00417025	320	0	0.0708504
433	Corucia_zebrata	433	0	0	333	0	0.0895174	321	0	0.0708182
404	Chelydra_serpentina	404	0	0	401	0	0.0361093	322	0	0.0703903
92	Cryptoprocta_ferox	307	0	0	295	0	0.127143	323	0	0.0698751
89	Ichneumia_albicauda	304	0	0	405	0	0.032331	324	0	0.0697719
87	Herpestes_edwardsii	302	0	0	343	0	0.0813379	325	0	0.0693833
185	Taphozous_melanopogon	346	0	0	427	0	0.00439879	326	0	0.0691851
51	Lontra_felina	272	0	0	317	0	0.108156	327	0	0.0685957
353	Eophona_migratoria	85	1	0.588367	67	0	0.450296	328	0	0.0677692
73	Ursus_thibetanus	133	0	0.482278	367	0	0.0630568	329	0	0.0674514
417	Anolis_gundlachi	417	0	0	118	0	0.300303	330	0	0.0670127
13	Canis_mesomelas	235	0	0	428	0	0.00435162	331	0	0.0640784
366	Platyspiza_crassirostris	5	1	1.83906	179	0	0.232654	332	0	0.0640645
374	Lagonosticta_senegala	80	1	0.590084	49	0	0.526675	333	0	0.0640588
380	Estrilda_troglodytes	86	1	0.586722	50	0	0.526675	334	0	0.0640588
69	Mephitis_mephitis	290	0	0	338	0	0.0875486	335	0	0.0639957
65	Mellivora_capensis	286	0	0	289	0	0.132356	336	0	0.0634891
175	Hipposideros_ridleyi	340	0	0	390	0	0.045052	337	0	0.0627763
310	Mecistops_cataphractus	386	0	0	276	0	0.143637	338	0	0.0625546
94	Salanoia_concolor	309	0	0	372	0	0.0602331	339	0	0.061723
300	Crocodylus_acutus	376	0	0	181	0	0.231205	340	0	0.0613142
111	Viverra_zibetha	324	0	0	434	0	9.24062e-05	341	0	0.0604844
395	Euparkeria_capensis	119	0	0.537884	51	0	0.515235	342	0	0.0578027
171	Rhinolophus_trifoliatus	336	0	0	328	0	0.0963459	343	0	0.0559156
28	Procyon_lotor	249	0	0	432	0	0.000818441	344	0	0.0558453
293	Thylacinus_cynocephalus	369	0	0	253	0	0.157442	345	0	0.0555683
329	Carnotaurus_sastrei	114	0	0.545649	81	0	0.350742	346	0	0.0554713
41	Gulo_gulo	262	0	0	291	0	0.128087	347	0	0.0548191
285	Otolemur_crassicaudatus	361	0	0	378	0	0.0571233	348	0	0.0546153
32	Nasuella_olivacea	253	0	0	398	0	0.0376686	349	0	0.054539
278	Hapalemur_griseus	219	0	0.152272	366	0	0.0633631	350	0	0.0520762
167	Rhinolophus_sedulus	332	0	0	385	0	0.0477809	351	0	0.0517091
240	Pan_paniscus	34	1	0.839892	262	0	0.151533	352	0	0.051224
2	Chrysocyon_brachyurus	224	0	0	282	0	0.138806	353	0	0.0501576
20	Vulpes_rueppellii	241	0	0	350	0	0.0744492	354	0	0.0497286
76	Ursus_arctos	134	0	0.482278	327	0	0.0994791	355	0	0.049436
307	Crocodylus_mindorensis	383	0	0	161	0	0.253775	356	0	0.0491578
56	Mustela_africana	277	0	0	421	0	0.0130062	357	0	0.0489357
383	Lonchura_fringilloides	74	1	0.596464	360	0	0.0665287	358	0	0.0476859
241	Australopithecus_anamensis	25	1	0.940345	259	0	0.154894	359	0	0.04668
158	Felis_silvestris	186	0	0.404392	337	0	0.0878036	360	0	0.0460582
104	Paradoxurus_hermaphroditus	317	0	0	430	0	0.00300813	361	0	0.0445424
147	Lynx_canadensis	188	0	0.403988	413	0	0.0210615	362	0	0.044436
44	Aonyx_capensis	265	0	0	304	0	0.118014	363	0	0.04381
302	Crocodylus_niloticus	378	0	0	175	0	0.236334	364	0	0.0435071
227	Myotis_albescens	159	0	0.439464	356	0	0.0694263	365	0	0.0434785
54	Ictonyx_libyca	275	0	0	376	0	0.0582048	366	0	0.0421027
107	Arctictis_binturong	320	0	0	307	0	0.115907	367	0	0.0411009
311	Paleosuchus_palpebrosus	387	0	0	163	0	0.253113	368	0	0.0408578
177	Hipposideros_bicolor	342	0	0	408	0	0.0282468	369	0	0.0397812
143	Leopardus_tigrinus	142	0	0.467459	365	0	0.0638561	370	0	0.0391355
43	Aonyx_cinerea	264	0	0	358	0	0.0682752	371	0	0.0374013
154	Felis_chaus	192	0	0.401937	411	0	0.0217579	372	0	0.0361846
430	Xenosaurus_platyceps	430	0	0	216	0	0.200042	373	0	0.0356665
198	Carollia_perspicillata	167	0	0.422334	415	0	0.0205009	374	0	0.0355635
135	Pardofelis_temminckii	204	0	0.383167	321	0	0.105849	375	0	0.035552
82	Crossarchus_platycephalus	297	0	0	393	0	0.0430372	376	0	0.0349023
42	Pteronura_brasiliensis	263	0	0	290	0	0.131682	377	0	0.0343943
70	Mephitis_macroura	291	0	0	414	0	0.0207035	378	0	0.0343922
162	Prionailurus_bengalensis	189	0	0.403646	355	0	0.0695933	379	0	0.0342284
152	Miracinonyx_studeri	187	0	0.404244	373	0	0.0598561	380	0	0.0339718
422	Anolis_oxylophus	422	0	0	204	0	0.216934	381	0	0.0335986
352	Padda_oryzivora	99	1	0.580097	347	0	0.079089	382	0	0.0334161
50	Lontra_canadensis	271	0	0	334	0	0.0893055	383	0	0.0320372
52	Lontra_longicaudis	273	0	0	410	0	0.0257717	384	0	0.0314967
114	Viverricula_indica	327	0	0	377	0	0.0576991	385	0	0.0306771
356	Serinus_mozambicus	63	1	0.619604	213	0	0.205267	386	0	0.0301901
348	Buteo_buteo	83	1	0.588429	15	1	0.903908	387	0	0.0301624
48	Hydrictis_maculicollis	269	0	0	419	0	0.0162886	388	0	0.0293814
84	Bdeogale_crassicauda	299	0	0	431	0	0.00134369	389	0	0.0293061
25	Urocyon_cinereoargenteus	246	0	0	420	0	0.0151651	390	0	0.0282153
296	Tomistoma_schlegelii	372	0	0	281	0	0.139253	391	0	0.0267291
371	Geospiza_scandens	2	1	2.32298	397	0	0.0381998	392	0	0.0267171
355	Carduelis_flammea	81	1	0.588956	185	0	0.228391	393	0	0.0266677
359	Carduelis_spinus	90	1	0.586149	186	0	0.228391	394	0	0.0266677
385	Lonchura_pallida	71	1	0.597945	187	0	0.228391	395	0	0.0266677
313	Caiman_latirostris	389	0	0	193	0	0.223713	396	0	0.0254921
132	Panthera_spelaea	122	0	0.526943	302	0	0.121351	397	0	0.0247335
108	Genetta_tigrina	321	0	0	409	0	0.0270947	398	0	0.0236066
317	Alligator_sinensis	393	0	0	111	0	0.31249	399	0	0.0224867
7	Lycalopex_culpaeus	229	0	0	386	0	0.0477802	400	0	0.0205933
31	Nasua_nasua	252	0	0	374	0	0.0592948	401	0	0.020509
136	Pardofelis_badia	202	0	0.390891	379	0	0.0569407	402	0	0.0187756
46	Lutra_sumatrana	267	0	0	407	0	0.0291076	403	0	0.0181669
1	Nyctereutes_procyonoides	223	0	0	371	0	0.0604984	404	0	0.0179801
86	Herpestes_auropunctatus	301	0	0	418	0	0.016387	405	0	0.0176234
358	Serinus_leucopygius	68	1	0.605405	98	0	0.328687	406	0	0.0163903
388	Taeniopygia_bichenovii	60	1	0.626401	99	0	0.328687	407	0	0.0163903
308	Crocodylus_johnsoni	384	0	0	131	0	0.285682	408	0	0.0147718
153	Puma_concolor	184	0	0.405094	297	0	0.124921	409	0	0.0147585
6	Lycalopex_vetulus	228	0	0	383	0	0.0540914	410	0	0.0147581
418	Anolis_pulchellus	418	0	0	123	0	0.296628	411	0	0.0140702
131	Panthera_leo	125	0	0.52029	287	0	0.134251	412	0	0.0140495
90	Rhynchogale_melleri	305	0	0	422	0	0.0106883	413	0	0.0140323
314	Caiman_crocodilus	390	0	0	156	0	0.258996	414	0	0.0119144
236	Tarsius_syrichta	353	0	0	384	0	0.0487059	415	0	0.0111446
15	Canis_latrans	236	0	0	340	0	0.0873443	416	0	0.0108975
10	Cerdocyon_thous	232	0	0	370	0	0.0614244	417	0	0.0103981
188	Noctilio_leporinus	215	0	0.357543	280	0	0.139343	418	0	0.00901092
110	Viverra_tangalunga	323	0	0	381	0	0.0561891	419	0	0.00839923
339	Branta_canadensis	98	1	0.580097	17	1	0.880836	420	0	0.00775827
24	Vulpes_chama	245	0	0	388	0	0.0466198	421	0	0.00638601
64	Meles_meles	285	0	0	362	0	0.0650106	422	0	0.00542897
16	Canis_aureus	237	0	0	363	0	0.0643233	423	0	0.00493504
47	Lutra_lutra	268	0	0	364	0	0.0639796	424	0	0.004934
12	Canis_adustus	234	0	0	375	0	0.0582431	425	0	0.00466525
112	Viverra_megaspila	325	0	0	361	0	0.0651967	426	0	0.00415458
268	Propithecus_tattersalli	55	0	0.643342	396	0	0.0383702	427	0	0.00410658
381	Erythrura_gouldiae	87	1	0.586388	275	0	0.144794	428	0	0.00337961
189	Noctilio_albiventris	217	0	0.355266	332	0	0.0910422	429	0	0.00297809
190	Sturnira_lilium	169	0	0.421764	368	0	0.0630482	430	0	0.00235783
299	Crocodylus_rhombifer	375	0	0	197	0	0.222041	431	0	0.00228173
429	Norops_auratus	429	0	0	115	0	0.303416	432	0	0.00192588
216	Scotophilus_kuhlii	209	0	0.37418	352	0	0.0730735	433	0	0.00117328
157	Felis_catus	180	0	0.411708	403	0	0.0351807	434	0	0.00075427

## Sheet: nonPhylo5Group
Taxon	F_Bite	F_Bite_Predict	PI_L	PI_U	F_Bite_Resid	F_Bite_Resid_ABS	Outliers	Rank
Saimiri_sciureus	0.593286	1.85434	1.2697	2.43897	-1.26105	1.26105	1	1
Callicebus_torquatus	0.830589	2.02949	1.44569	2.61328	-1.1989	1.1989	1	2
Dromaius_novaehollandiae	0.963788	2.10843	1.51072	2.70614	-1.14464	1.14464	1	3
Plateosaurus_engelhardti	2.45025	3.52445	2.9243	4.1246	-1.0742	1.0742	1	4
Chelus_fimbriata	0.69897	1.71429	1.12527	2.30332	-1.01532	1.01532	1	5
Geospiza_magnirostris	1.84985	0.932463	0.339547	1.52538	0.917386	0.917386	1	6
Sus_scrofa	2.57403	3.47867	2.89208	4.06525	-0.904636	0.904636	1	7
Stegosaurus_stenops	2.94939	3.8179	3.21223	4.42358	-0.868515	0.868515	1	8
Erlikosaurus_andrewsi	2.42813	3.28428	2.68734	3.88122	-0.856143	0.856143	1	9
Callithrix_argentata	0.783904	1.62532	1.03921	2.21143	-0.841416	0.841416	1	10
Gallotia_galloti	2.03571	1.25688	0.668078	1.84568	0.778831	0.778831	1	11
Archaeopteryx_lithographica	0.490029	1.26792	0.650487	1.88536	-0.777896	0.777896	1	12
Callithrix_jacchus	0.843233	1.59687	1.01055	2.18319	-0.753635	0.753635	1	13
Myiopsitta_monachus	1.22376	0.473134	-0.133982	1.08025	0.750621	0.750621	1	14
Struthio_camelus	1.72181	2.44903	1.84624	3.05182	-0.727221	0.727221	1	15
Ateles_geoffroyi	1.88468	2.60006	2.01723	3.18289	-0.715377	0.715377	1	16
Aotus_trivirgatus	1.16791	1.87565	1.29114	2.46017	-0.707747	0.707747	1	17
Cactospiza_pallida	0.201397	0.893459	0.30171	1.48521	-0.692062	0.692062	1	18
Colobus_polykomos	1.9703	2.65977	2.07689	3.24265	-0.689465	0.689465	1	19
Pelomedusa_subrufa	0.90309	1.5749	0.986383	2.16342	-0.671812	0.671812	1	20
Riojasuchus_tenuisceps	2.3652	3.00864	2.41913	3.59816	-0.643447	0.643447	1	21
Callimico_goeldii	1.08493	1.7256	1.14019	2.31101	-0.640669	0.640669	1	22
Proteles_cristatus	3.35211	2.72711	2.14413	3.31008	0.625	0.625	1	23
Piliocolobus_rufomitratus	2.03503	2.65977	2.07689	3.24265	-0.624736	0.624736	1	24
Alouatta_guariba	1.88762	2.5022	1.9194	3.085	-0.61458	0.61458	1	25
Dromaeosaurus_albertensis	2.9471	2.33437	1.73826	2.93047	0.612734	0.612734	1	26
Monophyllus_redmani	0.146128	0.741449	0.155164	1.32773	-0.595321	0.595321	1	27
Tyrannosaurus_rex	4.75708	4.16456	3.55015	4.77896	0.592519	0.592519	0	28
Tarbosaurus_bataar	4.38476	3.79595	3.19075	4.40115	0.588809	0.588809	0	29
Rhea_americana	1.41162	1.99365	1.39711	2.5902	-0.582034	0.582034	0	30
Saguinus_fuscicollis	1.05231	1.62532	1.03921	2.21143	-0.57301	0.57301	0	31
Dasyurus_hallucatus	1.97174	1.41538	0.80954	2.02121	0.556363	0.556363	0	32
Sarcophilus_harrisii	2.84871	2.31107	1.7067	2.91544	0.537638	0.537638	0	33
Murina_aenea	1.0976	0.560945	-0.0273939	1.14928	0.536659	0.536659	0	34
Herrerasaurus_ischigualastensis	3.28709	2.75559	2.16146	3.34972	0.5315	0.5315	0	35
Cebus_olivaceus	1.77844	2.29778	1.71477	2.88078	-0.519336	0.519336	0	36
Varecia_rubra	1.8423	2.35548	1.77257	2.9384	-0.513185	0.513185	0	37
Macaca_fascicularis	2.95348	2.44104	1.85821	3.02386	0.512443	0.512443	0	38
Anolis_equestris	1.76057	1.24854	0.6597	1.83737	0.512038	0.512038	0	39
Macrochelys_temminckii	2.19866	1.7042	1.11523	2.29317	0.494456	0.494456	0	40
Murina_cyclotis	1.07555	0.591121	0.00325029	1.17899	0.484426	0.484426	0	41
Paranthropus_boisei	3.57017	3.09017	2.50603	3.67431	0.48	0.48	0	42
Hipposideros_galeritus	0.0530784	0.519393	-0.0696725	1.10846	-0.466314	0.466314	0	43
Perodicticus_potto	1.55991	2.02437	1.44055	2.60818	-0.464459	0.464459	0	44
Emballonura_monticola	0.0253059	0.488106	-0.101569	1.07778	-0.4628	0.4628	0	45
Lemur_catta	1.75213	2.21041	1.62722	2.79361	-0.458288	0.458288	0	46
Homo_heidelbergensis	2.76518	3.21273	2.62795	3.79751	-0.447554	0.447554	0	47
Panthera_onca	3.8402	3.39406	2.80811	3.98001	0.446136	0.446136	0	48
Sinraptor_dongi	4.03524	3.59292	2.99164	4.1942	0.442319	0.442319	0	49
Testudo_horsfieldii	1.25527	1.69492	1.10599	2.28385	-0.439649	0.439649	0	50
Homo_neanderthalensis	2.86836	3.30019	2.71488	3.88551	-0.431833	0.431833	0	51
Homo_ergaster	2.76938	3.20071	2.61599	3.78542	-0.431329	0.431329	0	52
Mirza_coquereli	1.16791	1.59687	1.01055	2.18319	-0.42896	0.42896	0	53
Lophostoma_silvicolum	1.45332	1.04086	0.454014	1.62771	0.412456	0.412456	0	54
Trachemys_scripta	1.17609	1.58618	0.997639	2.17473	-0.410094	0.410094	0	55
Xenosmilus_hodsonae	3.3257	3.72537	3.1366	4.31415	-0.399676	0.399676	0	56
Allosaurus_fragilis	3.9726	3.57483	2.97385	4.1758	0.397776	0.397776	0	57
Platyrrhinus_lineatus	1.40483	1.00919	0.422638	1.59575	0.395642	0.395642	0	58
Pteropus_poliocephalus	1.79934	2.18767	1.55463	2.82072	-0.388333	0.388333	0	59
Phyllostomus_hastatus	1.83251	1.44624	0.850794	2.04169	0.386268	0.386268	0	60
Erophylla_sezekorni	0.447158	0.833004	0.247074	1.41893	-0.385846	0.385846	0	61
Pteropus_vampyrus	1.92788	2.3107	1.66894	2.95246	-0.382815	0.382815	0	62
Rousettus_aegyptiacus	1.27439	1.65697	1.0536	2.26034	-0.382582	0.382582	0	63
Geospiza_fortis	1.24055	0.859842	0.268946	1.45074	0.380707	0.380707	0	64
Accipiter_striatus	0.152288	0.520302	-0.0857691	1.12637	-0.368014	0.368014	0	65
Cheirogaleus_medius	1.18752	1.55447	0.96782	2.14112	-0.366951	0.366951	0	66
Mustela_altaica	1.80889	1.44764	0.860095	2.03519	0.361244	0.361244	0	67
Australopithecus_afarensis	3.47562	3.12263	2.53833	3.70693	0.352988	0.352988	0	68
Serinus_sulphuratus	1.07918	0.73495	0.145978	1.32392	0.344231	0.344231	0	69
Anolis_chloris	0.767898	0.428843	-0.169925	1.02761	0.339054	0.339054	0	70
Panthera_tigris	3.95062	3.61182	3.02411	4.19953	0.338797	0.338797	0	71
Mustela_nivalis	1.56585	1.22757	0.637886	1.81725	0.338281	0.338281	0	72
Oryctolagus_cuniculus	1.97864	1.64161	1.03675	2.24648	0.337024	0.337024	0	73
Mustela_erminea	1.7839	1.44764	0.860095	2.03519	0.336262	0.336262	0	74
Staurotypus_triporcatus	2.14301	1.8068	1.21724	2.39637	0.336214	0.336214	0	75
Parasuchus_hislopi	3.29192	3.62762	3.03367	4.22158	-0.335697	0.335697	0	76
Eulemur_mongoz	1.78269	2.11181	1.52832	2.6953	-0.329121	0.329121	0	77
Microcebus_murinus	1.55157	1.22776	0.638079	1.81744	0.323814	0.323814	0	78
Crocuta_crocuta	3.34143	3.01926	2.41153	3.62699	0.322174	0.322174	0	79
Poephila_acuticauda	0.477121	0.158912	-0.446538	0.764362	0.318209	0.318209	0	80
Uraeginthus_bengalus	0	0.31742	-0.279414	0.914255	-0.31742	0.31742	0	81
Glossophaga_soricina	0.352183	0.668908	0.0820127	1.2558	-0.316725	0.316725	0	82
Murina_suilla	0.644439	0.329269	-0.264313	0.92285	0.31517	0.31517	0	83
Lesothosaurus_diagnosticus	2.39734	2.08404	1.48499	2.68308	0.313307	0.313307	0	84
Centurio_senex	0.612784	0.925035	0.338994	1.51108	-0.312252	0.312252	0	85
Majungasaurus_crenatissimus	3.89459	3.58472	2.98358	4.18586	0.309867	0.309867	0	86
Xenosaurus_grandis	1.27738	0.968034	0.377259	1.55881	0.309346	0.309346	0	87
Camarhynchus_psittacula	1.0026	0.694348	0.105577	1.28312	0.30825	0.30825	0	88
Eupleres_goudotii	2	2.30745	1.72446	2.89044	-0.307448	0.307448	0	89
Amadina_erythrocephala	0.60206	0.909071	0.316878	1.50126	-0.307011	0.307011	0	90
Taeniopygia_guttata	0.60206	0.909071	0.316878	1.50126	-0.307011	0.307011	0	91
Accipiter_cooperii	0.491362	0.796343	0.195489	1.3972	-0.304981	0.304981	0	92
Bassaricyon_gabbii	2.2634	1.95864	1.37453	2.54274	0.304761	0.304761	0	93
Batagur_borneoensis	2.16732	2.4705	1.87218	3.06882	-0.303182	0.303182	0	94
Myotis_ridleyi	0.139879	0.44127	-0.149415	1.03196	-0.301391	0.301391	0	95
Monodelphis_domestica	1.49499	1.19412	0.604076	1.78415	0.300874	0.300874	0	96
Coelophysis_rhodesiensis	2.59432	2.29414	1.69765	2.89063	0.300179	0.300179	0	97
Micronycteris_hirsuta	1.07262	0.774708	0.188606	1.36081	0.297909	0.297909	0	98
Melursus_ursinus	3.15351	3.45133	2.86496	4.0377	-0.29782	0.29782	0	99
Gorgosaurus_libratus	4.14041	3.84672	3.24042	4.45303	0.293685	0.293685	0	100
Homotherium_nestianus	3.41103	3.70269	3.11413	4.29124	-0.291654	0.291654	0	101
Terrapene_carolina	1.39794	1.68722	1.09833	2.27612	-0.289285	0.289285	0	102
Kerivoula_intermedia	-0.0409586	0.247884	-0.348223	0.84399	-0.288842	0.288842	0	103
Rattus_norvegicus	1.88525	1.59786	1.01154	2.18417	0.28739	0.28739	0	104
Hylobates_lar	2.79162	2.5044	1.9216	3.0872	0.287219	0.287219	0	105
Geranoaetus_melanoleucus	1.69897	1.41386	0.818992	2.00873	0.285111	0.285111	0	106
Daspletosaurus_torosus	4.22119	3.93892	3.33047	4.54737	0.282268	0.282268	0	107
Metailurus_parvulus	2.90673	3.18775	2.60311	3.77238	-0.281014	0.281014	0	108
Dasyurus_maculatus	2.57963	2.30103	1.71803	2.88403	0.278598	0.278598	0	109
Nimbacinus_dicksoni	2.75853	2.48663	1.90383	3.06944	0.271899	0.271899	0	110
Propithecus_coquereli	2.1271	2.39799	1.81513	2.98085	-0.270887	0.270887	0	111
Dasyurus_viverrinus	2.18099	1.91442	1.3301	2.49874	0.266563	0.266563	0	112
Avahi_laniger	1.74523	2.01119	1.42732	2.59506	-0.265958	0.265958	0	113
Mydaus_javanensis	2.06595	2.32794	1.74498	2.91089	-0.261986	0.261986	0	114
Eptesicus_furinalis	0.863323	0.605284	0.0176156	1.19295	0.258039	0.258039	0	115
Kerivoula_papillosa	0.868056	0.61506	0.0275244	1.20259	0.252997	0.252997	0	116
Pongo_pygmaeus	3.47405	3.22164	2.63681	3.80647	0.252403	0.252403	0	117
Falco_mexicanus	1.13956	0.88814	0.288677	1.4876	0.251424	0.251424	0	118
Platyrrhinus_helleri	1.0607	0.809517	0.223541	1.39549	0.25118	0.25118	0	119
Rhinolophus_luctus	1.25983	1.00919	0.422638	1.59575	0.250641	0.250641	0	120
Tonatia_saurophila	1.27416	1.02384	0.437153	1.61052	0.250322	0.250322	0	121
Leopardus_pardalis	2.99884	2.74872	2.1657	3.33173	0.250123	0.250123	0	122
Tayassu_pecari	3.30621	3.05701	2.47302	3.641	0.249204	0.249204	0	123
Neofelis_nebulosa	3.19926	2.95207	2.3685	3.53564	0.247196	0.247196	0	124
Eulemur_rubriventer	1.92716	2.1723	1.589	2.7556	-0.245133	0.245133	0	125
Rhinolophus_lepidus	0.247973	0.491968	-0.0976284	1.08156	-0.243995	0.243995	0	126
Felis_margarita	2.49248	2.24956	1.66646	2.83267	0.24292	0.24292	0	127
Crocodylus_porosus	3.95342	3.7108	3.11569	4.30592	0.242617	0.242617	0	128
Lepilemur_leucopus	1.56217	1.8017	1.21676	2.38663	-0.239525	0.239525	0	129
Myotis_nigricans	0.103804	0.342989	-0.250202	0.93618	-0.239185	0.239185	0	130
Homotherium_crusafonti	3.22396	3.45958	2.87315	4.04602	-0.235621	0.235621	0	131
Lophostoma_brasiliense	0.843855	0.609227	0.0216131	1.19684	0.234628	0.234628	0	132
Leopardus_colocolo	2.59528	2.36089	1.77799	2.9438	0.234381	0.234381	0	133
Phyllostomus_discolor	1.33465	1.10314	0.515549	1.69072	0.231519	0.231519	0	134
Megantereon_falconeri	3.07713	3.30754	2.72218	3.89289	-0.230409	0.230409	0	135
Prionailurus_rubiginosus	2.33686	2.10786	1.52436	2.69137	0.228995	0.228995	0	136
Mustela_putorius	2.24551	2.01653	1.43267	2.60038	0.228987	0.228987	0	137
Rhinolophus_robinsoni	0.344392	0.572024	-0.0161371	1.16019	-0.227632	0.227632	0	138
Macrogalidia_musschenbroekii	2.7332	2.50562	1.92282	3.08842	0.22758	0.22758	0	139
Gavialis_gangeticus	3.27761	3.50197	2.90952	4.09442	-0.224357	0.224357	0	140
Homo_sapiens	3.03342	3.25078	2.66577	3.83578	-0.217352	0.217352	0	141
Crocodylus_palustris	3.86303	3.64653	3.05232	4.24074	0.216494	0.216494	0	142
Caracal_caracal	2.99537	2.77938	2.19631	3.36246	0.215985	0.215985	0	143
Micronycteris_minuta	0.338456	0.553206	-0.0352619	1.14167	-0.214749	0.214749	0	144
Cavia_porcellus	1.84379	1.62982	1.04375	2.2159	0.21397	0.21397	0	145
Arctogalidia_trivirgata	2.44654	2.2366	1.65347	2.81973	0.209937	0.209937	0	146
Ailurus_fulgens	2.69002	2.48117	1.89837	3.06398	0.208846	0.208846	0	147
Propithecus_diadema	2.32471	2.53277	1.94997	3.11557	-0.208056	0.208056	0	148
Apalone_ferox	1.62325	1.41593	0.827515	2.00434	0.207323	0.207323	0	149
Desmodus_rotundus	0.934498	1.141	0.552855	1.72914	-0.206498	0.206498	0	150
Dactyloa_frenata	1.436	1.22982	0.640899	1.81873	0.206188	0.206188	0	151
Eira_barbara	2.68735	2.48209	1.89928	3.06489	0.205263	0.205263	0	152
Bassariscus_sumichrasti	2.36661	2.16243	1.5791	2.74576	0.204183	0.204183	0	153
Saara_hardwickii	1.70757	1.91139	1.31141	2.51138	-0.203824	0.203824	0	154
Eulemur_coronatus	1.91645	2.11955	1.53609	2.70302	-0.203099	0.203099	0	155
Neochmia_modesta	0.30103	0.503789	-0.0868316	1.09441	-0.202759	0.202759	0	156
Genetta_genetta	2.42259	2.22005	1.63687	2.80322	0.202543	0.202543	0	157
Paranthropus_robustus	3.24105	3.03958	2.45566	3.62349	0.201473	0.201473	0	158
Bassaricyon_alleni	2.24304	2.04194	1.45819	2.62569	0.201099	0.201099	0	159
Hipposideros_diadema	1.39463	1.19495	0.605882	1.78401	0.199679	0.199679	0	160
Micronycteris_brachyotis	0.880814	0.683153	0.0964008	1.26991	0.197661	0.197661	0	161
Leptailurus_serval	2.95037	2.75479	2.17176	3.33782	0.195581	0.195581	0	162
Erythrura_trichroa	0.69897	0.503789	-0.0868316	1.09441	0.195181	0.195181	0	163
Galago_moholi	1.21958	1.41419	0.826344	2.00204	-0.194605	0.194605	0	164
Osteolaemus_tetraspis	3.25212	3.05824	2.46865	3.64783	0.193885	0.193885	0	165
Martes_martes	2.36773	2.17871	1.59543	2.762	0.189016	0.189016	0	166
Pardofelis_marmorata	2.56891	2.38045	1.79757	2.96333	0.188453	0.188453	0	167
Enhydra_lutris	2.89675	3.08473	2.50061	3.66884	-0.187982	0.187982	0	168
Coelophysis_bauri	2.46044	2.27317	1.67646	2.86987	0.187274	0.187274	0	169
Tupinambis_merianae	2.60412	2.41766	1.8254	3.00992	0.186459	0.186459	0	170
Mimon_crenulatum	0.987666	0.802377	0.21638	1.38837	0.185289	0.185289	0	171
Panthera_augusta	3.63044	3.44522	2.85889	4.03154	0.185225	0.185225	0	172
Lophocebus_albigena	2.77887	2.59491	2.01209	3.17773	0.183964	0.183964	0	173
Hipposideros_cervinus	0.206826	0.390111	-0.201813	0.982036	-0.183285	0.183285	0	174
Anolis_sheplani	0.00860017	0.190579	-0.413464	0.794621	-0.181978	0.181978	0	175
Australopithecus_africanus	3.22571	3.04377	2.45984	3.6277	0.181948	0.181948	0	176
Panthera_uncia	3.30492	3.12312	2.53882	3.70742	0.181804	0.181804	0	177
Canis_lupus	3.18971	3.00802	2.42424	3.5918	0.181696	0.181696	0	178
Crocodylus_intermedius	3.79768	3.61624	3.02243	4.21004	0.181446	0.181446	0	179
Artibeus_jamaicensis	1.39724	1.21592	0.626452	1.80539	0.181325	0.181325	0	180
Camarhynchus_parvulus	0.661813	0.483278	-0.107815	1.07437	0.178535	0.178535	0	181
Tremarctos_ornatus	3.2772	3.45559	2.86919	4.042	-0.178397	0.178397	0	182
Didelphodon_vorax	2.45183	2.274	1.69094	2.85705	0.177837	0.177837	0	183
Parahyaena_brunnea	3.3137	3.13723	2.55285	3.7216	0.176474	0.176474	0	184
Didelphis_virginiana	2.64542	2.46964	1.88682	3.05245	0.175787	0.175787	0	185
Phoniscus_jagorii	0.807535	0.631994	0.0446771	1.21931	0.175541	0.175541	0	186
Hypargos_niveoguttatus	0.477121	0.651284	0.062497	1.24007	-0.174163	0.174163	0	187
Poephila_cincta	0.477121	0.651284	0.062497	1.24007	-0.174163	0.174163	0	188
Homo_erectus	3.03543	3.20947	2.62471	3.79424	-0.174044	0.174044	0	189
Ursus_americanus	3.30259	3.47485	2.8883	4.06141	-0.172262	0.172262	0	190
Prionailurus_planiceps	2.4627	2.29056	1.70754	2.87358	0.172139	0.172139	0	191
Taxidea_taxus	2.80154	2.62944	2.04659	3.21229	0.1721	0.1721	0	192
Dinofelis_cristata	3.30157	3.47333	2.88679	4.05988	-0.171764	0.171764	0	193
Micronycteris_microtis	0.711807	0.540071	-0.0486213	1.12876	0.171736	0.171736	0	194
Larus_fuscus	1.17094	0.999448	0.401439	1.59746	0.171494	0.171494	0	195
Vulpes_ferrilata	2.63246	2.46322	1.88041	3.04603	0.169237	0.169237	0	196
Galictis_cuja	2.23452	2.06547	1.48181	2.64913	0.169049	0.169049	0	197
Sternotherus_odoratus	1.49136	1.65958	1.07081	2.24836	-0.168223	0.168223	0	198
Martes_pennanti	2.56656	2.39879	1.81593	2.98165	0.167768	0.167768	0	199
Mustela_lutreola	1.96379	1.79645	1.21148	2.38142	0.167337	0.167337	0	200
Homo_habilis	2.89795	3.06491	2.48088	3.64893	-0.166962	0.166962	0	201
Leopardus_guigna	2.36021	2.1942	1.61096	2.77744	0.166011	0.166011	0	202
Platysternon_megacephalum	1.62325	1.45918	0.87079	2.04757	0.164067	0.164067	0	203
Artibeus_lituratus	1.50515	1.34359	0.751157	1.93602	0.161563	0.161563	0	204
Laudakia_stellio	1.0086	1.16943	0.5802	1.75865	-0.160826	0.160826	0	205
Conepatus_semistriatus	2.2052	2.36533	1.78243	2.94824	-0.160131	0.160131	0	206
Lynx_rufus	2.83965	2.68086	2.09795	3.26376	0.158792	0.158792	0	207
Ursus_maritimus	3.67202	3.83033	3.24047	4.42019	-0.158308	0.158308	0	208
Mauremys_reevesii	1.30103	1.45918	0.87079	2.04757	-0.158152	0.158152	0	209
Geospiza_fuliginosa	0.720986	0.562997	-0.0265576	1.15255	0.157989	0.157989	0	210
Martes_americana	2.14613	1.9889	1.40493	2.57287	0.157229	0.157229	0	211
Sciurus_carolinensis	1.92236	1.76616	1.18101	2.35131	0.156204	0.156204	0	212
Lonchura_punctulata	0.60206	0.446931	-0.145128	1.03899	0.155129	0.155129	0	213
Herpestes_ichneumon	2.47276	2.31786	1.73489	2.90083	0.154898	0.154898	0	214
Panthera_pardus	3.3468	3.19247	2.60781	3.77714	0.154327	0.154327	0	215
Hyperailurictis_validus	3.26685	3.11357	2.52932	3.69783	0.153278	0.153278	0	216
Falco_sparverius	0.600973	0.447698	-0.16	1.0554	0.153275	0.153275	0	217
Tiliqua_scincoides	1.61595	1.76855	1.17923	2.35787	-0.1526	0.1526	0	218
Crocodylus_novaeguineae	3.72916	3.57692	2.98361	4.17023	0.152246	0.152246	0	219
Alligator_mississippiensis	3.70902	3.55782	2.96474	4.15091	0.151191	0.151191	0	220
Gorilla_gorilla	3.60931	3.45843	2.872	4.04486	0.150882	0.150882	0	221
Rhinolophus_stheno	0.454845	0.605681	0.0180174	1.19334	-0.150836	0.150836	0	222
Nycticebus_coucang	1.67201	1.82186	1.23705	2.40668	-0.149859	0.149859	0	223
Acinonyx_jubatus	3.00783	3.15627	2.5718	3.74074	-0.148435	0.148435	0	224
Anolis_limifrons	0.292256	0.439543	-0.159013	1.0381	-0.147287	0.147287	0	225
Mops_mops	0.848805	0.995595	0.409151	1.58204	-0.14679	0.14679	0	226
Neochmia_ruficauda	0.30103	0.446931	-0.145128	1.03899	-0.145901	0.145901	0	227
Crocodylus_moreletii	3.64335	3.49773	2.90532	4.09013	0.145629	0.145629	0	228
Pyrrhula_pyrrhula	0.69897	0.84445	0.253898	1.435	-0.14548	0.14548	0	229
Crocodylus_siamensis	3.53339	3.38796	2.79661	3.97931	0.145432	0.145432	0	230
Cynogale_bennettii	2.58614	2.44316	1.86034	3.02599	0.142976	0.142976	0	231
Felis_nigripes	2.31275	2.17067	1.58737	2.75398	0.142078	0.142078	0	232
Hyaena_hyaena	3.25003	3.10844	2.52421	3.69266	0.141594	0.141594	0	233
Molossus_sinaloae	1.04961	0.908802	0.322814	1.49479	0.140804	0.140804	0	234
Prionodon_linsang	2.06371	1.92519	1.34092	2.50945	0.138522	0.138522	0	235
Falco_peregrinus	1.11261	0.974772	0.376464	1.57308	0.137833	0.137833	0	236
Fossa_fossana	2.34557	2.20897	1.62577	2.79218	0.136596	0.136596	0	237
Chiroderma_villosum	1.02694	0.891776	0.305829	1.47772	0.135166	0.135166	0	238
Speothos_venaticus	2.66932	2.53599	1.95319	3.1188	0.133322	0.133322	0	239
Nandinia_binotata	2.36698	2.23442	1.65128	2.81756	0.13256	0.13256	0	240
Smilodon_fatalis	3.49971	3.63206	3.04416	4.21995	-0.132347	0.132347	0	241
Mungos_mungo	2.031	2.16243	1.5791	2.74576	-0.131423	0.131423	0	242
Rhodospiza_obsoleta	0.778151	0.909071	0.316878	1.50126	-0.13092	0.13092	0	243
Nycticebus_pygmaeus	1.554	1.68321	1.09751	2.2689	-0.129202	0.129202	0	244
Cynictis_penicillata	2.05385	1.92519	1.34092	2.50945	0.12866	0.12866	0	245
Pytilia_hypogrammica	0.477121	0.60544	0.0163773	1.1945	-0.128318	0.128318	0	246
Lycalopex_griseus	2.65011	2.52219	1.93939	3.10499	0.127927	0.127927	0	247
Rhinolophus_affinis	0.638489	0.766061	0.179917	1.3522	-0.127572	0.127572	0	248
Helarctos_malayanus	3.37643	3.25103	2.66603	3.83604	0.125399	0.125399	0	249
Panthera_atrox	3.70179	3.82659	3.23678	4.41641	-0.1248	0.1248	0	250
Hipposideros_larvatus	0.973128	0.848354	0.262438	1.43427	0.124774	0.124774	0	251
Kerivoula_pellucida	0.264818	0.388639	-0.203324	0.980601	-0.123821	0.123821	0	252
Anolis_distichus	0.447158	0.570882	-0.025244	1.16701	-0.123724	0.123724	0	253
Pelodiscus_sinensis	1.77085	1.64755	1.05882	2.23628	0.123302	0.123302	0	254
Myotis_simus	0.459392	0.580641	-0.00738679	1.16867	-0.121249	0.121249	0	255
Lycaon_pictus	3.04673	2.92678	2.3433	3.51027	0.119946	0.119946	0	256
Mycerobas_affinis	1.57978	1.69968	1.04782	2.35155	-0.1199	0.1199	0	257
Pan_troglodytes	3.28524	3.16725	2.58273	3.75178	0.117988	0.117988	0	258
Sphenodon_punctatus	2.37712	2.25939	1.66524	2.85354	0.117731	0.117731	0	259
Ictonyx_striatus	2.15957	2.04194	1.45819	2.62569	0.117628	0.117628	0	260
Trachops_cirrhosus	1.12287	1.00669	0.420158	1.59322	0.11618	0.11618	0	261
Paguma_larvata	2.55047	2.43618	1.85335	3.01901	0.11429	0.11429	0	262
Otocolobus_manul	2.49248	2.3783	1.79541	2.96118	0.114185	0.114185	0	263
Bassariscus_astutus	2.24105	2.12711	1.54367	2.71055	0.113935	0.113935	0	264
Myotis_ater	0.38739	0.499566	-0.089879	1.08901	-0.112176	0.112176	0	265
Norops_humilis	0.32838	0.439543	-0.159013	1.0381	-0.111164	0.111164	0	266
Galidia_elegans	2.06744	1.95864	1.37453	2.54274	0.108805	0.108805	0	267
Leopardus_geoffroyi	2.52994	2.42175	1.83891	3.00459	0.108195	0.108195	0	268
Puma_yagouaroundi	2.44711	2.55507	1.97226	3.13787	-0.107959	0.107959	0	269
Vulpes_zerda	2.11261	2.00537	1.42147	2.58927	0.107236	0.107236	0	270
Vulpes_vulpes	2.67943	2.57374	1.99093	3.15655	0.105691	0.105691	0	271
Caracal_aurata	2.82814	2.72263	2.13966	3.3056	0.105518	0.105518	0	272
Vulpes_velox	2.45179	2.34719	1.76426	2.93011	0.104599	0.104599	0	273
Lutrogale_perspicillata	2.78789	2.6833	2.10039	3.2662	0.10459	0.10459	0	274
Carollia_castanea	0.61066	0.713517	0.127031	1.3	-0.102857	0.102857	0	275
Prionailurus_viverrinus	2.78124	2.6784	2.09549	3.2613	0.102847	0.102847	0	276
Civettictis_civetta	2.66521	2.76778	2.18473	3.35084	-0.102579	0.102579	0	277
Ornithosuchus_woodwardi	3.85406	3.75184	3.1561	4.34757	0.102221	0.102221	0	278
Martes_flavigula	2.38561	2.28554	1.70251	2.86857	0.100064	0.100064	0	279
Carpodacus_erythrinus	0.778151	0.877495	0.286169	1.46882	-0.0993442	0.0993442	0	280
Otocyon_megalotis	2.34753	2.44653	1.86371	3.02935	-0.0990045	0.0990045	0	281
Vulpes_lagopus	2.59894	2.50152	1.91871	3.08432	0.0974209	0.0974209	0	282
Carduelis_chloris	1.14613	1.0488	0.45129	1.64632	0.0973248	0.0973248	0	283
Uroderma_bilobatum	0.977724	0.881147	0.295217	1.46708	0.096577	0.096577	0	284
Dogania_subplana	1.5682	1.66466	1.07586	2.25346	-0.0964599	0.0964599	0	285
Anolis_valencienni	0.826075	0.730632	0.137021	1.32424	0.0954432	0.0954432	0	286
Hipposideros_lylei	1.21245	1.1185	0.530701	1.70631	0.093951	0.093951	0	287
Carduelis_sinica	0.90309	0.809793	0.219904	1.39968	0.0932975	0.0932975	0	288
Proailurus_lemanensis	2.98541	2.8935	2.31012	3.47687	0.0919072	0.0919072	0	289
Gallus_gallus	0.944413	1.03599	0.438401	1.63358	-0.0915754	0.0915754	0	290
Galerella_pulverulenta	2.03583	2.12711	1.54367	2.71055	-0.091283	0.091283	0	291
Falco_columbarius	0.675778	0.584511	-0.02021	1.18923	0.0912676	0.0912676	0	292
Uromastyx_acanthinura	1.77232	1.68328	1.0944	2.27216	0.0890419	0.0890419	0	293
Eidolon_helvum	1.89154	1.80259	1.19243	2.41276	0.0889448	0.0889448	0	294
Ailuropoda_melanoleuca	3.56012	3.47198	2.88545	4.05852	0.0881387	0.0881387	0	295
Martes_foina	2.29623	2.20897	1.62577	2.79218	0.0872527	0.0872527	0	296
Phyllostomus_elongatus	1.16967	1.08345	0.496123	1.67078	0.0862216	0.0862216	0	297
Certhidea_olivacea	0.222716	0.308845	-0.288379	0.906068	-0.0861282	0.0861282	0	298
FAM_62192	3.11279	3.02776	2.44389	3.61162	0.0850315	0.0850315	0	299
Paleosuchus_trigonatus	3.03423	3.11892	2.52917	3.70868	-0.0846959	0.0846959	0	300
Caiman_yacare	2.98722	3.07169	2.48207	3.66131	-0.0844735	0.0844735	0	301
Procyon_cancrivorus	2.67706	2.59264	2.00982	3.17546	0.0844189	0.0844189	0	302
Cariama_cristata	1.28825	1.20384	0.607832	1.79985	0.0844077	0.0844077	0	303
Nycteris_tragata	0.974512	0.890727	0.304782	1.47667	0.0837844	0.0837844	0	304
Lynx_lynx	2.82292	2.90606	2.32264	3.48947	-0.0831362	0.0831362	0	305
Mustela_frenata	1.65896	1.57638	0.989897	2.16286	0.0825881	0.0825881	0	306
Herpestes_fuscus	2.20898	2.12711	1.54367	2.71055	0.0818657	0.0818657	0	307
Cuon_alpinus	2.9008	2.81985	2.23668	3.40302	0.0809513	0.0809513	0	308
Melanosuchus_niger	3.43072	3.35111	2.76006	3.94216	0.0796122	0.0796122	0	309
Anolis_garmani	1.04336	0.963984	0.37317	1.5548	0.079378	0.079378	0	310
Neovison_vison	2.06819	1.9889	1.40493	2.57287	0.0792866	0.0792866	0	311
Lynx_pardinus	2.79771	2.71997	2.13701	3.30294	0.0777369	0.0777369	0	312
Lycalopex_gymnocercus	2.55023	2.47413	1.89132	3.05694	0.0760955	0.0760955	0	313
Leopardus_wiedii	2.40932	2.33354	1.75059	2.91648	0.0757792	0.0757792	0	314
Atelocynus_microtis	2.77159	2.696	2.11307	3.27892	0.0755907	0.0755907	0	315
Anolis_cristatellus	0.876795	0.802107	0.209465	1.39475	0.0746877	0.0746877	0	316
Amadina_fasciata	0.69897	0.773357	0.184003	1.36271	-0.0743867	0.0743867	0	317
Cynopterus_brachyotis	1.08991	1.16373	0.57522	1.75224	-0.0738259	0.0738259	0	318
Potos_flavus	2.40926	2.33771	1.75477	2.92065	0.0715478	0.0715478	0	319
Symphalangus_syndactylus	2.64444	2.71529	2.13233	3.29825	-0.0708504	0.0708504	0	320
Corucia_zebrata	1.77012	1.6993	1.11035	2.28825	0.0708182	0.0708182	0	321
Chelydra_serpentina	2.32015	2.24976	1.65528	2.84423	0.0703903	0.0703903	0	322
Cryptoprocta_ferox	2.6807	2.61082	2.02799	3.19366	0.0698751	0.0698751	0	323
Ichneumia_albicauda	2.32098	2.39075	1.80788	2.97362	-0.0697719	0.0697719	0	324
Herpestes_edwardsii	2.17725	2.10786	1.52436	2.69137	0.0693833	0.0693833	0	325
Taphozous_melanopogon	0.89098	0.960165	0.373957	1.54637	-0.0691851	0.0691851	0	326
Lontra_felina	2.48287	2.41428	1.83143	2.99712	0.0685957	0.0685957	0	327
Eophona_migratoria	1.5563	1.48853	0.859275	2.11779	0.0677692	0.0677692	0	328
Ursus_thibetanus	3.35629	3.42375	2.83758	4.00991	-0.0674514	0.0674514	0	329
Anolis_gundlachi	0.822822	0.755809	0.162551	1.34907	0.0670127	0.0670127	0	330
Canis_mesomelas	2.57403	2.63811	2.05525	3.22097	-0.0640784	0.0640784	0	331
Platyspiza_crassirostris	1.19201	1.12795	0.526364	1.72953	0.0640645	0.0640645	0	332
Lagonosticta_senegala	0	0.0640588	-0.547956	0.676074	-0.0640588	0.0640588	0	333
Estrilda_troglodytes	0	0.0640588	-0.547956	0.676074	-0.0640588	0.0640588	0	334
Mephitis_mephitis	2.3006	2.2366	1.65347	2.81973	0.0639957	0.0639957	0	335
Mellivora_capensis	2.80305	2.73956	2.15656	3.32256	0.0634891	0.0634891	0	336
Hipposideros_ridleyi	0.572872	0.635648	0.0483763	1.22292	-0.0627763	0.0627763	0	337
Mecistops_cataphractus	3.31848	3.38104	2.78974	3.97233	-0.0625546	0.0625546	0	338
Salanoia_concolor	2.02036	1.95864	1.37453	2.54274	0.061723	0.061723	0	339
Crocodylus_acutus	3.60195	3.54064	2.94776	4.13352	0.0613142	0.0613142	0	340
Viverra_zibetha	2.58501	2.64549	2.06263	3.22836	-0.0604844	0.0604844	0	341
Euparkeria_capensis	2.33422	2.27641	1.68249	2.87034	0.0578027	0.0578027	0	342
Rhinolophus_trifoliatus	0.823474	0.767559	0.181422	1.3537	0.0559156	0.0559156	0	343
Procyon_lotor	2.54827	2.60411	2.02128	3.18694	-0.0558453	0.0558453	0	344
Thylacinus_cynocephalus	3.16149	3.10592	2.5217	3.69014	0.0555683	0.0555683	0	345
Carnotaurus_sastrei	3.72214	3.66667	3.06406	4.26928	0.0554713	0.0554713	0	346
Gulo_gulo	2.84323	2.78841	2.20532	3.37151	0.0548191	0.0548191	0	347
Otolemur_crassicaudatus	2.05763	2.00301	1.4191	2.58692	0.0546153	0.0546153	0	348
Nasuella_olivacea	2.10789	2.16243	1.5791	2.74576	-0.054539	0.054539	0	349
Hapalemur_griseus	1.79782	1.8499	1.26524	2.43456	-0.0520762	0.0520762	0	350
Rhinolophus_sedulus	0.503791	0.5555	-0.0329293	1.14393	-0.0517091	0.0517091	0	351
Pan_paniscus	3.13977	3.08855	2.50441	3.67268	0.051224	0.051224	0	352
Chrysocyon_brachyurus	3.00928	2.95912	2.37553	3.54272	0.0501576	0.0501576	0	353
Vulpes_rueppellii	2.29929	2.24956	1.66646	2.83267	0.0497286	0.0497286	0	354
Ursus_arctos	3.57862	3.62805	3.0402	4.21591	-0.049436	0.049436	0	355
Crocodylus_mindorensis	3.43712	3.38796	2.79661	3.97931	0.0491578	0.0491578	0	356
Mustela_africana	1.62531	1.57638	0.989897	2.16286	0.0489357	0.0489357	0	357
Lonchura_fringilloides	0.69897	0.651284	0.062497	1.24007	0.0476859	0.0476859	0	358
Australopithecus_anamensis	3.22298	3.1763	2.59172	3.76087	0.04668	0.04668	0	359
Felis_silvestris	2.48458	2.43853	1.8557	3.02135	0.0460582	0.0460582	0	360
Paradoxurus_hermaphroditus	2.39164	2.43618	1.85335	3.01901	-0.0445424	0.0445424	0	361
Lynx_canadensis	2.65773	2.70216	2.11923	3.2851	-0.044436	0.044436	0	362
Aonyx_capensis	2.84261	2.7988	2.21568	3.38192	0.04381	0.04381	0	363
Crocodylus_niloticus	3.4833	3.43979	2.84798	4.03161	0.0435071	0.0435071	0	364
Myotis_albescens	0.338456	0.381935	-0.210201	0.974071	-0.0434785	0.0434785	0	365
Ictonyx_libyca	1.75435	1.79645	1.21148	2.38142	-0.0421027	0.0421027	0	366
Arctictis_binturong	2.84658	2.80548	2.22235	3.38862	0.0411009	0.0411009	0	367
Paleosuchus_palpebrosus	2.95424	2.9951	2.4056	3.5846	-0.0408578	0.0408578	0	368
Hipposideros_bicolor	0.559907	0.599688	0.0119405	1.18744	-0.0397812	0.0397812	0	369
Leopardus_tigrinus	2.2887	2.24956	1.66646	2.83267	0.0391355	0.0391355	0	370
Aonyx_cinerea	2.35526	2.31786	1.73489	2.90083	0.0374013	0.0374013	0	371
Felis_chaus	2.58212	2.61831	2.03547	3.20114	-0.0361846	0.0361846	0	372
Xenosaurus_platyceps	1.09447	1.0588	0.468826	1.64878	0.0356665	0.0356665	0	373
Carollia_perspicillata	0.822822	0.858385	0.272471	1.4443	-0.0355635	0.0355635	0	374
Pardofelis_temminckii	2.79099	2.75544	2.17241	3.33846	0.035552	0.035552	0	375
Crossarchus_platycephalus	2.10037	2.06547	1.48181	2.64913	0.0349023	0.0349023	0	376
Pteronura_brasiliensis	3.08941	3.05502	2.47104	3.639	0.0343943	0.0343943	0	377
Mephitis_macroura	2.09272	2.12711	1.54367	2.71055	-0.0343922	0.0343922	0	378
Prionailurus_bengalensis	2.40193	2.36771	1.78481	2.9506	0.0342284	0.0342284	0	379
Miracinonyx_studeri	2.98264	3.01661	2.4328	3.60043	-0.0339718	0.0339718	0	380
Anolis_oxylophus	0.646404	0.680002	0.0856472	1.27436	-0.0335986	0.0335986	0	381
Padda_oryzivora	1	1.03342	0.436606	1.63023	-0.0334161	0.0334161	0	382
Lontra_canadensis	2.64286	2.61082	2.02799	3.19366	0.0320372	0.0320372	0	383
Lontra_longicaudis	2.57933	2.61082	2.02799	3.19366	-0.0314967	0.0314967	0	384
Viverricula_indica	2.30578	2.2751	1.69205	2.85815	0.0306771	0.0306771	0	385
Serinus_mozambicus	0.477121	0.446931	-0.145128	1.03899	0.0301901	0.0301901	0	386
Buteo_buteo	0.947012	0.977175	0.378896	1.57545	-0.0301624	0.0301624	0	387
Hydrictis_maculicollis	2.45271	2.48209	1.89928	3.06489	-0.0293814	0.0293814	0	388
Bdeogale_crassicauda	2.25624	2.28554	1.70251	2.86857	-0.0293061	0.0293061	0	389
Urocyon_cinereoargenteus	2.42846	2.45667	1.87386	3.03949	-0.0282153	0.0282153	0	390
Tomistoma_schlegelii	3.5311	3.55782	2.96474	4.15091	-0.0267291	0.0267291	0	391
Geospiza_scandens	0.889862	0.863145	0.272171	1.45412	0.0267171	0.0267171	0	392
Carduelis_flammea	0.477121	0.503789	-0.0868316	1.09441	-0.0266677	0.0266677	0	393
Carduelis_spinus	0.477121	0.503789	-0.0868316	1.09441	-0.0266677	0.0266677	0	394
Lonchura_pallida	0.477121	0.503789	-0.0868316	1.09441	-0.0266677	0.0266677	0	395
Caiman_latirostris	3.16643	3.19192	2.60187	3.78197	-0.0254921	0.0254921	0	396
Panthera_spelaea	3.57191	3.59664	3.00907	4.18421	-0.0247335	0.0247335	0	397
Genetta_tigrina	2.51433	2.53793	1.95513	3.12073	-0.0236066	0.0236066	0	398
Alligator_sinensis	3.03503	3.01254	2.42303	3.60206	0.0224867	0.0224867	0	399
Lycalopex_culpaeus	2.71349	2.73408	2.15109	3.31707	-0.0205933	0.0205933	0	400
Nasua_nasua	2.42619	2.40568	1.82282	2.98853	0.020509	0.020509	0	401
Pardofelis_badia	2.41756	2.39879	1.81593	2.98165	0.0187756	0.0187756	0	402
Lutra_sumatrana	2.48173	2.4999	1.91709	3.0827	-0.0181669	0.0181669	0	403
Nyctereutes_procyonoides	2.46509	2.44711	1.86428	3.02993	0.0179801	0.0179801	0	404
Herpestes_auropunctatus	1.97128	1.9889	1.40493	2.57287	-0.0176234	0.0176234	0	405
Serinus_leucopygius	0.30103	0.31742	-0.279414	0.914255	-0.0163903	0.0163903	0	406
Taeniopygia_bichenovii	0.30103	0.31742	-0.279414	0.914255	-0.0163903	0.0163903	0	407
Crocodylus_johnsoni	3.11126	3.09649	2.5068	3.68618	0.0147718	0.0147718	0	408
Puma_concolor	3.21268	3.19792	2.61323	3.78262	0.0147585	0.0147585	0	409
Lycalopex_vetulus	2.42651	2.41175	1.8289	2.9946	0.0147581	0.0147581	0	410
Anolis_pulchellus	0.401401	0.415471	-0.183566	1.01451	-0.0140702	0.0140702	0	411
Panthera_leo	3.60718	3.62123	3.03343	4.20902	-0.0140495	0.0140495	0	412
Rhynchogale_melleri	2.23553	2.24956	1.66646	2.83267	-0.0140323	0.0140323	0	413
Caiman_crocodilus	3.08458	3.09649	2.5068	3.68618	-0.0119144	0.0119144	0	414
Tarsius_syrichta	1.32201	1.31087	0.722041	1.8997	0.0111446	0.0111446	0	415
Canis_latrans	2.83459	2.82369	2.24051	3.40687	0.0108975	0.0108975	0	416
Cerdocyon_thous	2.55194	2.54154	1.95874	3.12434	0.0103981	0.0103981	0	417
Noctilio_leporinus	1.29885	1.28984	0.698766	1.88092	0.00901092	0.00901092	0	418
Viverra_tangalunga	2.51402	2.50562	1.92282	3.08842	0.00839923	0.00839923	0	419
Branta_canadensis	1.44008	1.44783	0.853063	2.0426	-0.00775827	0.00775827	0	420
Vulpes_chama	2.42813	2.42175	1.83891	3.00459	0.00638601	0.00638601	0	421
Meles_meles	2.75159	2.75702	2.17398	3.34005	-0.00542897	0.00542897	0	422
Canis_aureus	2.63929	2.63435	2.0515	3.21721	0.00493504	0.00493504	0	423
Lutra_lutra	2.63548	2.63055	2.0477	3.2134	0.004934	0.004934	0	424
Canis_adustus	2.66876	2.67342	2.09053	3.25632	-0.00466525	0.00466525	0	425
Viverra_megaspila	2.65686	2.65271	2.06984	3.23558	0.00415458	0.00415458	0	426
Propithecus_tattersalli	2.35959	2.35548	1.77257	2.9384	0.00410658	0.00410658	0	427
Erythrura_gouldiae	0.60206	0.60544	0.0163773	1.1945	-0.00337961	0.00337961	0	428
Noctilio_albiventris	1.07591	1.07889	0.491616	1.66616	-0.00297809	0.00297809	0	429
Sturnira_lilium	0.887617	0.885259	0.299324	1.4712	0.00235783	0.00235783	0	430
Crocodylus_rhombifer	3.32366	3.32138	2.73056	3.91221	0.00228173	0.00228173	0	431
Norops_auratus	0.457882	0.455956	-0.142279	1.05419	0.00192588	0.00192588	0	432
Scotophilus_kuhlii	0.962843	0.964016	0.377786	1.55025	-0.00117328	0.00117328	0	433
Felis_catus	2.37328	2.37403	1.79114	2.95692	-0.00075427	0.00075427	0	434

## Sheet: Phylo
Node ID	No Taxa	Original BL	No different from original	Pct time scaled	Mean Scalar	Mode Scalar	Median Scalar	SD Scalar	Mean SigV	Mode SigV	Median SigV	SD SigV	Mean DeltaB	Mode DeltaB	Median DeltaB	SD DeltaB	Mean DeltaV	Mode DeltaV	Median DeltaV	SD DeltaV	Taxa List	Rank	Signif	Rate_Scalar
748	1	0.344278	900	100	1987.53	611.725	875.738	5492.72	0.804528	0.451104	0.600628	0.889751	0.000246	0.000248	0.000256	9.1e-05	0.276981	0.155305	0.206783	0.306322	Geospiza_magnirostris	1	1	875.738
747	1	0.344278	900	100	1190.14	52.8194	210.369	12318.2	0.382574	0.061441	0.106021	1.58278	0.000246	0.000248	0.000256	9.1e-05	0.131712	0.021153	0.036501	0.544916	Geospiza_scandens	2	1	210.369
735	1	1.464	900	100	211.943	49.5376	74.3748	537.125	0.096845	0.039818	0.048585	0.154674	0.001047	0.001055	0.001088	0.000387	0.141781	0.058293	0.071128	0.226443	Cactospiza_pallida	3	1	74.3748
749	1	0.532657	900	100	320.242	52.2856	73.8862	942.022	0.14897	0.036782	0.047477	0.24546	0.000381	0.000384	0.000396	0.000141	0.07935	0.019592	0.025289	0.130746	Geospiza_fuliginosa	4	1	73.8862
736	1	1.464	900	100	223.089	49.808	69.0331	717.944	0.094784	0.039513	0.046352	0.163869	0.001047	0.001055	0.001088	0.000387	0.138764	0.057848	0.06786	0.239904	Platyspiza_crassirostris	5	1	69.0331
741	1	0.330947	900	100	114.343	44.693	61.2904	205.69	0.054968	0.037796	0.04175	0.062629	0.000237	0.000239	0.000246	8.8e-05	0.018191	0.012508	0.013817	0.020727	Camarhynchus_parvulus	6	1	61.2904
740	1	0.330947	900	100	124.781	43.9742	61.2238	283.789	0.056034	0.037546	0.041663	0.073859	0.000237	0.000239	0.000246	8.8e-05	0.018544	0.012426	0.013788	0.024444	Camarhynchus_psittacula	7	1	61.2238
744	1	8.49107	900	100	164.432	40.9367	61.1737	409.154	0.072881	0.036592	0.04147	0.12125	0.006074	0.006121	0.006313	0.002247	0.618835	0.310706	0.352128	1.02954	Geospiza_fortis	8	1	61.1737
742	1	2.17615	900	100	114.249	45.4367	60.2395	212.959	0.054497	0.038697	0.041248	0.071077	0.001557	0.001569	0.001618	0.000576	0.118592	0.08421	0.089761	0.154674	Certhidea_olivacea	9	1	60.2395
491	1	0.366459	900	100	119.884	37.9394	48.8602	258.325	0.057855	0.026973	0.033457	0.113013	0.000262	0.000264	0.000272	9.7e-05	0.021201	0.009885	0.012261	0.041415	Paranthropus_boisei	10	1	48.8602
498	1	0.531366	900	100	140.111	30.0522	46.8669	828.409	0.054531	0.030209	0.032808	0.154992	0.00038	0.000383	0.000395	0.000141	0.028976	0.016052	0.017433	0.082357	Homo_ergaster	11	1	46.8669
505	1	0.586335	900	100	115.808	32.494	45.2085	628.345	0.042644	0.029137	0.031674	0.073714	0.000419	0.000423	0.000436	0.000155	0.025004	0.017084	0.018572	0.043221	Homo_erectus	12	1	45.2085
503	1	0.384782	900	100	103.335	38.8668	45.1224	270.122	0.043522	0.028683	0.03194	0.063377	0.000275	0.000277	0.000286	0.000102	0.016747	0.011037	0.01229	0.024386	Homo_heidelbergensis	13	1	45.1224
492	1	0.696273	900	100	93.8391	34.7539	44.8472	193.421	0.04318	0.027347	0.031241	0.060419	0.000498	0.000502	0.000518	0.000184	0.030065	0.019041	0.021752	0.042068	Paranthropus_robustus	14	1	44.8472
496	1	1.24596	900	100	95.573	39.4873	44.7435	322.117	0.038385	0.029174	0.031497	0.041199	0.000891	0.000898	0.000926	0.00033	0.047826	0.036349	0.039244	0.051333	Homo_habilis	15	1	44.7435
501	1	1.61242	900	100	101.26	36.4039	44.7435	353.328	0.042127	0.02805	0.031607	0.111733	0.001153	0.001162	0.001199	0.000427	0.067926	0.045228	0.050964	0.18016	Homo_sapiens	16	1	44.7435
504	1	0.916148	900	100	96.3694	36.1201	44.5153	321.169	0.042682	0.027329	0.031556	0.150171	0.000655	0.00066	0.000681	0.000242	0.039103	0.025038	0.02891	0.137579	Homo_neanderthalensis	17	1	44.5153
494	1	0.934471	900	100	83.827	33.9664	43.4131	205.054	0.035989	0.028957	0.03054	0.038853	0.000668	0.000674	0.000695	0.000247	0.033631	0.02706	0.028538	0.036307	Australopithecus_africanus	18	1	43.4131
506	1	1.24596	900	100	63.5533	29.7591	35.9769	114.104	0.030616	0.026306	0.025602	0.039297	0.000891	0.000898	0.000926	0.00033	0.038146	0.032776	0.031899	0.048963	Australopithecus_afarensis	19	1	35.9769
650	1	35.7	900	100	72.6482	22.5152	35.2685	126.51	0.032172	0.018331	0.024955	0.026199	0.025538	0.025733	0.026543	0.009446	1.14853	0.654419	0.89091	0.935294	Plateosaurus_engelhardti	20	1	35.2685
778	1	2.37791	900	100	49.5328	5.39332	20.089	142.255	0.020003	0.004208	0.012913	0.024301	0.001701	0.001714	0.001768	0.000629	0.047564	0.010005	0.030706	0.057786	Poephila_acuticauda	21	1	20.089
205	1	8.93	883	98.1111	27.2888	10.7648	14.494	53.3956	0.012083	0.00846	0.010169	0.009152	0.006388	0.006437	0.006639	0.002363	0.107901	0.075549	0.090813	0.081729	Proteles_cristatus	22	1	14.494
332	1	40.0242	863	95.8889	29.7816	9.89187	14.2371	75.8429	0.012177	0.008037	0.009756	0.010391	0.028631	0.02885	0.029758	0.01059	0.487355	0.321688	0.390463	0.415889	Sus_scrofa	23	1	14.2371
648	1	68.2	895	99.4444	31.7886	5.78065	11.9972	74.3425	0.014954	0.004139	0.008498	0.030684	0.048787	0.04916	0.050707	0.018045	1.01985	0.282287	0.579547	2.09264	Stegosaurus_stenops	24	1	11.9972
487	1	1.68571	890	98.8889	28.8534	6.17906	8.71655	64.7262	0.013985	0.004683	0.005939	0.024276	0.001206	0.001215	0.001253	0.000446	0.023574	0.007895	0.010011	0.040923	Australopithecus_anamensis	25	1	8.71655
551	1	18.9368	853	94.7778	19.729	4.99878	8.28661	48.5759	0.008503	0.003147	0.005453	0.008658	0.013546	0.01365	0.014079	0.00501	0.161014	0.059593	0.103254	0.163953	Microcebus_murinus	26	0	8.28661
516	1	10.5554	897	99.6667	27.1305	6.33341	8.28538	76.3688	0.012022	0.004562	0.005708	0.019725	0.007551	0.007609	0.007848	0.002793	0.126902	0.048158	0.060245	0.20821	Macaca_fascicularis	27	1	8.28538
263	1	3.094	891	99	21.099	4.12627	7.88402	49.1689	0.009719	0.002655	0.005652	0.012929	0.002213	0.00223	0.0023	0.000819	0.030071	0.008216	0.017488	0.040002	Panthera_onca	28	1	7.88402
513	1	9.39122	894	99.3333	27.349	5.52046	7.73483	132.472	0.010838	0.00473	0.005529	0.019377	0.006718	0.006769	0.006982	0.002485	0.101779	0.044416	0.051926	0.18197	Colobus_polykomos	29	1	7.73483
512	1	9.39122	894	99.3333	23.8271	5.73362	7.71917	74.4192	0.010025	0.00467	0.005516	0.014863	0.006718	0.006769	0.006982	0.002485	0.094149	0.043857	0.051803	0.139582	Piliocolobus_rufomitratus	30	1	7.71917
515	1	10.5554	894	99.3333	20.803	6.30553	7.68429	45.051	0.00977	0.004593	0.005494	0.014289	0.007551	0.007609	0.007848	0.002793	0.103122	0.048481	0.057991	0.15083	Lophocebus_albigena	31	1	7.68429
532	1	16.7483	899	99.8889	21.3962	5.93316	7.67862	47.5876	0.010406	0.004447	0.005428	0.019279	0.011981	0.012073	0.012452	0.004431	0.174283	0.07448	0.090912	0.322885	Saimiri_sciureus	32	1	7.67862
198	1	10.05	713	79.2222	13.8287	1.73973	7.44798	37.6907	0.006566	0.001287	0.004647	0.008738	0.007189	0.007244	0.007472	0.002659	0.065992	0.012937	0.046703	0.087818	Eupleres_goudotii	33	0	7.44798
485	1	2.83678	888	98.6667	17.6613	5.87262	6.91659	51.5523	0.008192	0.004385	0.004842	0.016614	0.002029	0.002045	0.002109	0.000751	0.02324	0.01244	0.013737	0.047131	Pan_paniscus	34	1	6.91659
484	1	2.83678	888	98.6667	16.2529	5.67995	6.88016	35.3613	0.007787	0.004311	0.004842	0.010688	0.002029	0.002045	0.002109	0.000751	0.022089	0.012229	0.013737	0.03032	Pan_troglodytes	35	1	6.88016
509	1	7.77389	895	99.4444	13.8441	5.57683	6.88016	31.8655	0.006439	0.004322	0.004871	0.006981	0.005561	0.005604	0.00578	0.002057	0.05006	0.033603	0.037864	0.054273	Symphalangus_syndactylus	36	1	6.88016
508	1	7.77389	891	99	12.9739	5.87934	6.81485	22.8038	0.006353	0.004352	0.004823	0.008276	0.005561	0.005604	0.00578	0.002057	0.049385	0.03383	0.037493	0.064333	Hylobates_lar	37	1	6.81485
531	1	16.7483	888	98.6667	14.9284	5.80277	6.81485	33.8238	0.006913	0.004334	0.00485	0.009954	0.011981	0.012073	0.012452	0.004431	0.115783	0.072588	0.081228	0.16672	Cebus_olivaceus	38	1	6.81485
481	1	8.90496	888	98.6667	15.8042	6.22912	6.72466	56.6644	0.006642	0.004335	0.004778	0.009704	0.00637	0.006419	0.006621	0.002356	0.059144	0.038602	0.042545	0.086415	Gorilla_gorilla	39	1	6.72466
479	1	15.7814	889	98.7778	13.529	5.61354	6.67183	33.9202	0.00592	0.004383	0.004778	0.00539	0.011289	0.011376	0.011733	0.004176	0.09343	0.069165	0.075398	0.085067	Pongo_pygmaeus	40	1	6.67183
518	1	21.3133	890	98.8889	13.1394	5.6547	6.66888	24.6246	0.006577	0.004354	0.00473	0.010065	0.015247	0.015363	0.015846	0.005639	0.140176	0.092808	0.100821	0.214509	Callicebus_torquatus	41	1	6.66888
527	1	4.82596	884	98.2222	12.2345	5.83443	6.43892	31.6399	0.005885	0.003955	0.004449	0.009853	0.003452	0.003479	0.003588	0.001277	0.028401	0.019085	0.021469	0.047549	Callithrix_argentata	42	1	6.43892
534	1	15.0849	881	97.8889	11.9137	5.69394	6.38867	23.3904	0.005702	0.004354	0.004531	0.007623	0.010791	0.010874	0.011216	0.003991	0.086007	0.065685	0.068349	0.114986	Ateles_geoffroyi	43	1	6.38867
535	1	15.0849	880	97.7778	13.292	5.12956	6.36936	62.4139	0.005475	0.004303	0.004527	0.006003	0.010791	0.010874	0.011216	0.003991	0.082589	0.06491	0.068291	0.090559	Alouatta_guariba	44	1	6.36936
523	1	13.0419	880	97.7778	11.3673	5.31176	6.35024	29.4475	0.005144	0.003814	0.004457	0.004694	0.00933	0.009401	0.009697	0.003451	0.067084	0.049746	0.058123	0.061214	Saguinus_fuscicollis	45	1	6.35024
528	1	10.3623	882	98	10.989	5.47623	6.35024	20.2674	0.005303	0.003731	0.004425	0.005488	0.007413	0.007469	0.007704	0.002742	0.054955	0.03866	0.045852	0.056868	Callimico_goeldii	46	1	6.35024
526	1	4.82596	881	97.8889	10.8831	5.42457	6.32962	20.1857	0.005385	0.003869	0.004425	0.008321	0.003452	0.003479	0.003588	0.001277	0.025986	0.018672	0.021354	0.040157	Callithrix_jacchus	47	1	6.32962
529	1	17.5421	881	97.8889	10.2391	5.47971	6.2572	17.6164	0.004832	0.003698	0.004415	0.002996	0.012549	0.012645	0.013043	0.004641	0.084755	0.064868	0.077443	0.052565	Aotus_trivirgatus	48	1	6.2572
642	1	8.9	704	78.2222	13.7549	2.00931	5.4452	45.4127	0.005981	0.001477	0.003161	0.00943	0.006367	0.006415	0.006617	0.002355	0.053228	0.013144	0.02813	0.083928	Ornithosuchus_woodwardi	49	0	5.4452
777	1	2.37791	894	99.3333	23.888	4.08693	5.24938	59.8613	0.011609	0.002855	0.003467	0.026508	0.001701	0.001714	0.001768	0.000629	0.027605	0.00679	0.008244	0.063032	Poephila_cincta	50	1	5.24938
643	1	19.5	689	76.5556	12.2478	2.01212	4.99225	30.8423	0.005492	0.001296	0.003073	0.009661	0.013949	0.014056	0.014498	0.005159	0.1071	0.025277	0.059923	0.188395	Riojasuchus_tenuisceps	51	0	4.99225
36	1	3.3	641	71.2222	10.2253	1.68712	4.75938	22.3005	0.004858	0.001119	0.002459	0.005531	0.002361	0.002379	0.002454	0.000873	0.016032	0.003692	0.008113	0.018252	Canis_lupus	52	0	4.75938
724	1	8.18934	895	99.4444	17.481	3.74078	4.61402	57.2716	0.007211	0.002647	0.003174	0.01423	0.005858	0.005903	0.006089	0.002167	0.059052	0.021679	0.025995	0.116531	Serinus_sulphuratus	53	1	4.61402
550	1	18.9368	679	75.4444	15.1528	3.11357	4.58353	88.1535	0.00538	0.001157	0.002849	0.010172	0.013546	0.01365	0.014079	0.00501	0.101884	0.021909	0.053949	0.192625	Mirza_coquereli	54	0	4.58353
542	1	4.55323	695	77.2222	9.26104	1.67313	4.39888	21.0804	0.004768	0.001209	0.002614	0.00889	0.003257	0.003282	0.003385	0.001205	0.021709	0.005504	0.011903	0.040478	Propithecus_tattersalli	55	0	4.39888
647	1	22.4	706	78.4444	13.2577	2.65637	4.35058	34.132	0.005672	0.002705	0.002965	0.010587	0.016024	0.016146	0.016654	0.005927	0.127045	0.060581	0.06641	0.237158	Lesothosaurus_diagnosticus	56	0	4.35058
262	1	2.039	843	93.6667	12.95	3.01803	4.26753	32.1414	0.006228	0.002095	0.002635	0.015138	0.001459	0.00147	0.001516	0.000539	0.0127	0.004271	0.005372	0.030866	Panthera_augusta	57	0	4.26753
781	1	8.22707	893	99.2222	11.2169	3.68592	4.25601	28.2978	0.005118	0.002752	0.002993	0.008215	0.005885	0.00593	0.006117	0.002177	0.04211	0.022643	0.024622	0.067582	Taeniopygia_guttata	58	1	4.25601
763	1	1.94893	896	99.5556	11.7319	3.172	4.25436	35.7656	0.005345	0.002628	0.00299	0.009754	0.001394	0.001405	0.001449	0.000516	0.010417	0.005123	0.005828	0.01901	Amadina_fasciata	59	1	4.25436
780	1	8.22707	893	99.2222	10.2089	3.36599	4.23059	22.0848	0.004932	0.00272	0.002983	0.008794	0.005885	0.00593	0.006117	0.002177	0.040579	0.022374	0.024544	0.07235	Taeniopygia_bichenovii	60	1	4.23059
678	1	12.32	889	98.7778	12.8514	3.59035	4.22473	31.0212	0.00654	0.002639	0.002953	0.012218	0.008813	0.008881	0.00916	0.00326	0.080574	0.032509	0.036383	0.150521	Archaeopteryx_lithographica	61	1	4.22473
762	1	1.94893	899	99.8889	11.2798	3.21739	4.22473	32.8682	0.004844	0.002703	0.003001	0.007123	0.001394	0.001405	0.001449	0.000516	0.00944	0.005267	0.00585	0.013883	Amadina_erythrocephala	62	1	4.22473
723	1	8.18934	894	99.3333	10.4755	3.26692	4.1649	25.929	0.004584	0.002664	0.002939	0.007911	0.005858	0.005903	0.006089	0.002167	0.037537	0.021816	0.024067	0.064787	Serinus_mozambicus	63	1	4.1649
674	1	79.95	890	98.8889	9.84774	3.24226	4.16341	24.3517	0.00443	0.00262	0.002921	0.007868	0.057192	0.05763	0.059443	0.021154	0.354162	0.209455	0.233564	0.629031	Erlikosaurus_andrewsi	64	1	4.16341
773	1	4.88791	893	99.2222	8.92022	3.23864	4.07265	21.2693	0.004287	0.002673	0.002886	0.008882	0.003497	0.003523	0.003634	0.001293	0.020956	0.013066	0.014107	0.043416	Lonchura_punctulata	65	1	4.07265
788	1	73.4	892	99.1111	8.93469	3.28342	4.05125	20.3419	0.00405	0.002614	0.002879	0.005806	0.052507	0.052908	0.054573	0.019421	0.297239	0.191901	0.211332	0.426127	Dromaius_novaehollandiae	66	1	4.05125
676	1	95.84	886	98.4444	9.5598	3.19774	4.04129	47.4	0.003732	0.002571	0.002883	0.00447	0.068559	0.069084	0.071257	0.025358	0.357679	0.246429	0.276277	0.428393	Dromaeosaurus_albertensis	67	1	4.04129
725	1	8.65	893	99.2222	8.99943	3.3821	4.03092	22.4012	0.00389	0.00253	0.002853	0.00504	0.006188	0.006235	0.006431	0.002289	0.033648	0.021887	0.02468	0.043599	Serinus_leucopygius	68	1	4.03092
767	1	8.25337	894	99.3333	9.25472	3.13351	3.97505	22.6163	0.004083	0.002515	0.002862	0.006016	0.005904	0.005949	0.006136	0.002184	0.033701	0.020756	0.023619	0.049656	Erythrura_trichroa	69	1	3.97505
760	1	10.2316	895	99.4444	7.58689	3.30188	3.97505	13.1303	0.003556	0.002601	0.002839	0.004115	0.007319	0.007375	0.007607	0.002707	0.036384	0.026615	0.029045	0.042102	Uraeginthus_bengalus	70	1	3.97505
774	1	4.88791	893	99.2222	8.43306	3.24532	3.96228	20.1021	0.003997	0.002595	0.00285	0.008243	0.003497	0.003523	0.003634	0.001293	0.019537	0.012684	0.013928	0.040292	Lonchura_pallida	71	1	3.96228
700	1	10.2644	892	99.1111	9.13671	3.35133	3.95349	21.9743	0.004398	0.002502	0.002819	0.007941	0.007343	0.007399	0.007632	0.002716	0.04514	0.025679	0.028931	0.081514	Geranoaetus_melanoleucus	72	1	3.95349
157	1	6.14919	670	74.4444	9.06682	1.75649	3.95058	22.4782	0.0042	0.001155	0.002481	0.005625	0.004399	0.004432	0.004572	0.001627	0.025829	0.007102	0.015254	0.034586	Helarctos_malayanus	73	0	3.95058
771	1	10.2762	892	99.1111	7.66539	3.10025	3.94879	14.5533	0.003549	0.00257	0.002833	0.004023	0.007351	0.007407	0.00764	0.002719	0.036468	0.026412	0.029113	0.041343	Lonchura_fringilloides	74	1	3.94879
787	1	73.4	892	99.1111	8.1403	3.27089	3.9463	19.2481	0.00368	0.00265	0.002833	0.005168	0.052507	0.052908	0.054573	0.019421	0.270136	0.194484	0.207944	0.379356	Struthio_camelus	75	1	3.9463
759	1	9.69831	894	99.3333	7.29439	3.27676	3.93361	13.6958	0.003476	0.002644	0.002791	0.006735	0.006938	0.006991	0.007211	0.002566	0.033714	0.025644	0.027064	0.065319	Hypargos_niveoguttatus	76	1	3.93361
758	1	9.63164	894	99.3333	7.977	3.29737	3.92235	32.7721	0.003298	0.002598	0.00279	0.003418	0.00689	0.006943	0.007161	0.002548	0.031767	0.025025	0.026869	0.032921	Pytilia_hypogrammica	77	1	3.92235
783	1	8.22707	892	99.1111	6.89666	3.2544	3.91585	11.3884	0.003166	0.002554	0.00278	0.002431	0.005885	0.00593	0.006117	0.002177	0.026045	0.02101	0.022871	0.019997	Neochmia_ruficauda	78	1	3.91585
442	1	11.1173	841	93.4444	13.0552	2.91599	3.90889	41.0526	0.005417	0.001949	0.002607	0.008517	0.007953	0.008014	0.008266	0.002941	0.06022	0.021663	0.028982	0.094691	Kerivoula_intermedia	79	0	3.90889
757	1	9.63164	895	99.4444	7.00892	3.20425	3.8912	11.5338	0.003258	0.002609	0.002787	0.003195	0.00689	0.006943	0.007161	0.002548	0.031377	0.025129	0.026846	0.030774	Lagonosticta_senegala	80	1	3.8912
720	1	8.76	893	99.2222	8.28061	3.18762	3.88111	21.3334	0.003469	0.002552	0.00277	0.003566	0.006266	0.006314	0.006513	0.002318	0.030385	0.022354	0.024268	0.03124	Carduelis_flammea	81	1	3.88111
784	1	8.22707	892	99.1111	7.24462	3.4217	3.88111	18.0755	0.003124	0.002543	0.002772	0.002436	0.005885	0.00593	0.006117	0.002177	0.0257	0.020918	0.022809	0.02004	Neochmia_modesta	82	1	3.88111
701	1	10.2644	892	99.1111	7.70953	3.2385	3.87641	14.1974	0.003611	0.002509	0.002777	0.005041	0.007343	0.007399	0.007632	0.002716	0.037069	0.025753	0.028501	0.051739	Buteo_buteo	83	1	3.87641
789	1	73.4	891	99	7.84654	3.06311	3.87641	20.7294	0.003345	0.002588	0.002777	0.00413	0.052507	0.052908	0.054573	0.019421	0.245513	0.189953	0.203806	0.303157	Rhea_americana	84	1	3.87641
713	1	13.4151	892	99.1111	8.0198	3.39512	3.87585	22.1217	0.003622	0.002494	0.002764	0.007263	0.009596	0.00967	0.009974	0.003549	0.048586	0.03346	0.037077	0.09744	Eophona_migratoria	85	1	3.87585
764	1	11.2521	893	99.2222	6.42617	3.20558	3.86119	9.61603	0.002921	0.002541	0.002768	0.001003	0.008049	0.008111	0.008366	0.002977	0.032863	0.02859	0.031145	0.011283	Estrilda_troglodytes	86	1	3.86119
766	1	8.25337	893	99.2222	8.42749	3.09207	3.85823	29.4414	0.003321	0.00252	0.00279	0.003661	0.005904	0.005949	0.006136	0.002184	0.027409	0.0208	0.023024	0.030212	Erythrura_gouldiae	87	1	3.85823
704	1	18.5942	892	99.1111	7.59603	3.12961	3.85733	15.6115	0.003478	0.002525	0.002762	0.003971	0.013301	0.013403	0.013825	0.00492	0.064677	0.046953	0.05136	0.073838	Accipiter_cooperii	88	1	3.85733
705	1	87.8	895	99.4444	8.72253	4.01157	3.85733	50.6203	0.003373	0.002511	0.002752	0.003431	0.062808	0.063288	0.065279	0.023231	0.296162	0.220432	0.241596	0.301257	Myiopsitta_monachus	89	1	3.85733
726	1	8.76	893	99.2222	9.19594	3.7625	3.8561	45.2051	0.00334	0.002548	0.002747	0.003399	0.006266	0.006314	0.006513	0.002318	0.02926	0.022317	0.02406	0.029773	Carduelis_spinus	90	1	3.8561
729	1	2.5836	893	99.2222	9.09642	3.05966	3.8561	39.2297	0.003491	0.002524	0.002745	0.003861	0.001848	0.001862	0.001921	0.000684	0.00902	0.006522	0.007091	0.009974	Carduelis_chloris	91	1	3.8561
703	1	18.5942	892	99.1111	7.53997	3.19966	3.84211	13.3956	0.003478	0.002502	0.002749	0.004082	0.013301	0.013403	0.013825	0.00492	0.064678	0.046527	0.051116	0.075906	Accipiter_striatus	92	1	3.84211
714	1	13.4151	892	99.1111	7.56231	3.1855	3.83055	16.4769	0.003433	0.002586	0.00275	0.004481	0.009596	0.00967	0.009974	0.003549	0.046058	0.034687	0.036893	0.060116	Mycerobas_affinis	93	1	3.83055
683	1	83.7	891	99	7.08715	3.33248	3.82788	14.6435	0.003166	0.00255	0.002755	0.002413	0.059875	0.060333	0.062231	0.022146	0.264963	0.213465	0.230609	0.201991	Gallus_gallus	94	1	3.82788
728	1	2.5836	893	99.2222	8.55428	3.18718	3.82788	27.5735	0.003693	0.002372	0.002742	0.012351	0.001848	0.001862	0.001921	0.000684	0.009541	0.006128	0.007085	0.031909	Carduelis_sinica	95	1	3.82788
730	1	14.8829	892	99.1111	7.14652	3.16585	3.82788	18.3906	0.003152	0.00254	0.002732	0.003238	0.010646	0.010728	0.011065	0.003938	0.04691	0.037808	0.040655	0.048191	Carpodacus_erythrinus	96	1	3.82788
732	1	16.5	892	99.1111	7.12589	3.11359	3.82788	15.9589	0.003243	0.002513	0.002728	0.004354	0.011803	0.011894	0.012268	0.004366	0.053507	0.041459	0.04501	0.071834	Rhodospiza_obsoleta	97	1	3.82788
682	1	83.7	890	98.8889	6.72487	3.14818	3.80274	10.3125	0.003121	0.002549	0.002747	0.00227	0.059875	0.060333	0.062231	0.022146	0.2612	0.21333	0.229889	0.189975	Branta_canadensis	98	1	3.80274
708	1	35.1	892	99.1111	7.08863	3.24781	3.80274	15.8113	0.003183	0.002538	0.002746	0.003543	0.025109	0.025301	0.026097	0.009287	0.111737	0.089081	0.096371	0.124376	Padda_oryzivora	99	1	3.80274
731	1	15.1954	892	99.1111	6.97443	3.17754	3.7976	15.5889	0.003107	0.002554	0.002723	0.003287	0.01087	0.010953	0.011298	0.00402	0.047208	0.038811	0.041384	0.049951	Pyrrhula_pyrrhula	100	1	3.7976
695	1	5.92266	893	99.2222	8.71923	3.70009	3.77849	39.244	0.003466	0.002457	0.002706	0.005302	0.004237	0.004269	0.004403	0.001567	0.020529	0.014554	0.016026	0.0314	Falco_mexicanus	101	1	3.77849
688	1	85.3	893	99.2222	6.40656	3.23246	3.77841	10.4581	0.002897	0.002516	0.00271	0.001651	0.061019	0.061486	0.063421	0.022569	0.247085	0.214588	0.231159	0.140807	Larus_fuscus	102	1	3.77841
689	1	85.3	892	99.1111	6.50431	3.19469	3.77841	10.7085	0.002941	0.002532	0.002712	0.001813	0.061019	0.061486	0.063421	0.022569	0.25086	0.215976	0.231306	0.154611	Cariama_cristata	103	1	3.77841
697	1	10.5654	892	99.1111	6.4857	3.22491	3.77812	10.9458	0.002967	0.002518	0.002698	0.002341	0.007558	0.007616	0.007855	0.002795	0.031351	0.026608	0.028501	0.024738	Falco_sparverius	104	1	3.77812
694	1	5.92266	892	99.1111	7.29969	3.09604	3.75862	15.4426	0.00323	0.002476	0.002698	0.003636	0.004237	0.004269	0.004403	0.001567	0.019128	0.014666	0.015977	0.021534	Falco_peregrinus	105	1	3.75862
696	1	7.69079	892	99.1111	7.83745	3.08093	3.75862	25.0644	0.003229	0.002524	0.0027	0.004083	0.005502	0.005544	0.005718	0.002035	0.024833	0.019415	0.020768	0.031401	Falco_columbarius	106	1	3.75862
669	1	20.9889	789	87.6667	6.85151	3.30817	3.72426	12.6777	0.003102	0.002559	0.002625	0.004227	0.015014	0.015129	0.015605	0.005553	0.065102	0.053707	0.055092	0.08872	Daspletosaurus_torosus	107	0	3.72426
671	1	22.3444	788	87.5556	6.79148	3.19644	3.71604	12.417	0.00305	0.00256	0.002621	0.003189	0.015984	0.016106	0.016613	0.005912	0.068143	0.057207	0.058566	0.071257	Tarbosaurus_bataar	108	0	3.71604
672	1	22.3444	789	87.6667	6.53962	3.36996	3.70294	12.695	0.002862	0.002525	0.002591	0.002464	0.015984	0.016106	0.016613	0.005912	0.063953	0.05641	0.057893	0.055052	Tyrannosaurus_rex	109	0	3.70294
443	1	11.1173	833	92.5556	11.2539	2.64418	3.69306	38.4412	0.004759	0.001812	0.002398	0.007096	0.007953	0.008014	0.008266	0.002941	0.052904	0.020144	0.026658	0.078885	Kerivoula_papillosa	110	0	3.69306
667	1	35.2222	785	87.2222	6.3929	3.26855	3.68656	11.9248	0.002917	0.002511	0.00259	0.004321	0.025196	0.025389	0.026188	0.009319	0.102728	0.088454	0.091224	0.152194	Gorgosaurus_libratus	111	0	3.68656
652	1	8.6	658	73.1111	7.42926	1.24154	3.64411	17.2592	0.003167	0.000904	0.00248	0.004657	0.006152	0.006199	0.006394	0.002275	0.027237	0.007774	0.021324	0.040052	Herrerasaurus_ischigualastensis	112	0	3.64411
664	1	41.34	716	79.5556	6.26218	3.44825	3.523	11.8792	0.002711	0.002615	0.002512	0.002866	0.029573	0.029799	0.030736	0.010938	0.112077	0.108112	0.10384	0.118486	Allosaurus_fragilis	113	0	3.523
660	1	65.2	692	76.8889	8.88682	4.38136	3.51276	70.5823	0.003064	0.002595	0.002467	0.006117	0.046641	0.046998	0.048476	0.017251	0.199779	0.16917	0.160826	0.398847	Carnotaurus_sastrei	114	0	3.51276
663	1	29.04	715	79.4444	6.40572	3.52951	3.51276	12.9939	0.002833	0.002552	0.002479	0.005203	0.020774	0.020933	0.021591	0.007684	0.082256	0.074121	0.071976	0.151083	Sinraptor_dongi	115	0	3.51276
270	1	1.62933	819	91	9.81098	2.32935	3.4941	31.9372	0.004401	0.001827	0.002235	0.007993	0.001166	0.001174	0.001211	0.000431	0.007171	0.002977	0.003641	0.013023	Panthera_atrox	116	0	3.4941
655	1	29.25	670	74.4444	6.08445	1.17002	3.46671	11.0761	0.002679	0.000893	0.002403	0.002718	0.020924	0.021084	0.021747	0.007739	0.07837	0.026127	0.07028	0.079495	Coelophysis_bauri	117	0	3.46671
659	1	71.3	683	75.8889	7.93248	3.82209	3.46671	49.3401	0.002802	0.002622	0.002423	0.003974	0.051005	0.051395	0.053012	0.018865	0.19976	0.186956	0.172782	0.283363	Majungasaurus_crenatissimus	118	0	3.46671
790	1	9.2	545	60.5556	10.5872	1.4334	3.45051	24.2971	0.005242	0.001038	0.00198	0.007916	0.006581	0.006632	0.00684	0.002434	0.048226	0.009551	0.018219	0.07283	Euparkeria_capensis	119	0	3.45051
656	1	39.75	665	73.8889	5.97851	1.13634	3.4494	10.8677	0.002625	0.000889	0.002393	0.0026	0.028435	0.028653	0.029554	0.010517	0.104345	0.035319	0.095109	0.103367	Coelophysis_rhodesiensis	120	0	3.4494
258	1	8.365	816	90.6667	9.8371	2.64608	3.39882	23.4659	0.004637	0.001869	0.002224	0.010899	0.005984	0.00603	0.006219	0.002213	0.038786	0.015633	0.0186	0.09117	Panthera_tigris	121	0	3.39882
269	1	1.62533	816	90.6667	9.41157	2.46293	3.36467	32.1011	0.004074	0.001798	0.002215	0.007697	0.001163	0.001172	0.001208	0.00043	0.006621	0.002922	0.003599	0.01251	Panthera_spelaea	122	0	3.36467
390	1	11.8438	845	93.8889	13.2566	2.21048	3.35976	57.9357	0.005474	0.001824	0.002261	0.015779	0.008472	0.008537	0.008806	0.003134	0.064834	0.021608	0.026777	0.18688	Centurio_senex	123	0	3.35976
543	1	4.55323	606	67.3333	7.38517	1.15644	3.32915	17.1811	0.003442	0.000933	0.002019	0.007848	0.003257	0.003282	0.003385	0.001205	0.015673	0.00425	0.009191	0.035734	Propithecus_coquereli	124	0	3.32915
267	1	3.26267	810	90	9.53565	2.66461	3.31352	37.3749	0.003729	0.001805	0.002187	0.007097	0.002334	0.002352	0.002426	0.000863	0.012165	0.005888	0.007134	0.023156	Panthera_leo	125	0	3.31352
265	1	5.59083	810	90	7.54069	2.69146	3.31102	16.409	0.003358	0.001805	0.002176	0.003591	0.003999	0.00403	0.004157	0.001479	0.018777	0.010094	0.012167	0.020076	Panthera_pardus	126	0	3.31102
369	1	15.5333	638	70.8889	9.37503	1.57198	3.29368	25.1423	0.004138	0.001126	0.001886	0.00681	0.011112	0.011197	0.011549	0.00411	0.064278	0.017483	0.029293	0.105784	Eidolon_helvum	127	0	3.29368
440	1	14.5	812	90.2222	8.19081	2.77925	3.27904	20.5662	0.003772	0.001738	0.002175	0.006325	0.010373	0.010452	0.010781	0.003836	0.054689	0.025204	0.031544	0.09171	Kerivoula_pellucida	128	0	3.27904
370	1	15.5333	627	69.6667	7.93963	1.46385	3.17137	15.6126	0.003894	0.001202	0.001784	0.006289	0.011112	0.011197	0.011549	0.00411	0.060488	0.018672	0.027708	0.097689	Rousettus_aegyptiacus	129	0	3.17137
156	1	5.24604	597	66.3333	6.35523	1.29948	3.15243	14.7521	0.002955	0.000986	0.001545	0.003302	0.003753	0.003781	0.0039	0.001388	0.015503	0.00517	0.008106	0.017321	Ursus_americanus	130	0	3.15243
407	1	15.0207	806	89.5556	8.06639	2.82861	3.10624	22.571	0.00364	0.001845	0.002067	0.005094	0.010745	0.010827	0.011168	0.003974	0.054673	0.027714	0.031046	0.076515	Monophyllus_redmani	131	0	3.10624
259	1	8.365	795	88.3333	7.20343	2.4576	3.04001	17.0715	0.00313	0.001799	0.002036	0.004833	0.005984	0.00603	0.006219	0.002213	0.026186	0.015049	0.017034	0.040427	Panthera_uncia	132	0	3.04001
155	1	5.24604	596	66.2222	5.78573	1.19746	3.03583	11.4158	0.002875	0.000989	0.001489	0.003485	0.003753	0.003781	0.0039	0.001388	0.015084	0.005191	0.007809	0.018284	Ursus_thibetanus	133	0	3.03583
159	1	1.16849	585	65	7.08095	1.21871	3.03583	24.241	0.003311	0.001025	0.00139	0.008673	0.000836	0.000842	0.000869	0.000309	0.003869	0.001197	0.001624	0.010134	Ursus_arctos	134	0	3.03583
447	1	6.1	783	87	6.65778	2.72391	3.02128	19.1523	0.00309	0.001883	0.001996	0.005645	0.004364	0.004397	0.004535	0.001614	0.01885	0.011485	0.012173	0.034433	Murina_aenea	135	0	3.02128
448	1	6.1	781	86.7778	6.22026	2.75908	3.00268	17.7887	0.002886	0.001823	0.00197	0.003766	0.004364	0.004397	0.004535	0.001614	0.017602	0.011121	0.012018	0.022973	Murina_cyclotis	136	0	3.00268
430	1	12.3985	799	88.7778	7.92195	2.46075	2.96836	19.1224	0.003593	0.001826	0.001978	0.005403	0.008869	0.008937	0.009218	0.00328	0.044546	0.022645	0.024527	0.066993	Micronycteris_minuta	137	0	2.96836
397	1	8.15	809	89.8889	7.37103	2.62722	2.96809	19.0718	0.003384	0.00181	0.002012	0.004829	0.00583	0.005875	0.00606	0.002156	0.02758	0.01475	0.016395	0.039359	Platyrrhinus_lineatus	138	0	2.96809
444	1	14.5	773	85.8889	6.89436	2.39894	2.95875	25.3684	0.002878	0.001792	0.001958	0.003677	0.010373	0.010452	0.010781	0.003836	0.041728	0.025991	0.028384	0.05331	Phoniscus_jagorii	139	0	2.95875
449	1	9.79684	777	86.3333	6.14655	2.65611	2.95506	18.3153	0.002715	0.001818	0.001934	0.003314	0.007008	0.007062	0.007284	0.002592	0.026603	0.017809	0.01895	0.032465	Murina_suilla	140	0	2.95506
398	1	8.15	806	89.5556	7.94117	2.81496	2.93948	28.2284	0.003586	0.00164	0.001991	0.014645	0.00583	0.005875	0.00606	0.002156	0.029225	0.013366	0.016224	0.11936	Platyrrhinus_helleri	141	0	2.93948
291	1	0.851667	797	88.5556	8.75098	2.64559	2.93399	24.6037	0.004006	0.001817	0.001956	0.007218	0.000609	0.000614	0.000633	0.000225	0.003412	0.001547	0.001665	0.006147	Leopardus_tigrinus	142	0	2.93399
552	1	27.2907	562	62.4444	6.94177	1.05153	2.92799	18.6335	0.002944	0.000948	0.001723	0.004896	0.019522	0.019672	0.020291	0.007221	0.080357	0.025859	0.047034	0.133611	Cheirogaleus_medius	143	0	2.92799
406	1	15.0207	791	87.8889	6.93036	2.42884	2.92428	20.3237	0.002973	0.001828	0.001956	0.003822	0.010745	0.010827	0.011168	0.003974	0.044653	0.027453	0.029379	0.057406	Glossophaga_soricina	144	0	2.92428
160	1	1.16849	582	64.6667	6.14298	1.09735	2.90749	14.9234	0.002837	0.000973	0.001377	0.003723	0.000836	0.000842	0.000869	0.000309	0.003315	0.001137	0.001608	0.004351	Ursus_maritimus	145	0	2.90749
393	1	2.75667	793	88.1111	6.73952	2.7416	2.8791	22.8844	0.002719	0.001824	0.001938	0.004464	0.001972	0.001987	0.00205	0.000729	0.007497	0.005028	0.005342	0.012306	Artibeus_jamaicensis	146	0	2.8791
429	1	9.50813	789	87.6667	6.70289	2.40608	2.87203	20.2715	0.002938	0.001835	0.001927	0.003887	0.006802	0.006854	0.007069	0.002516	0.027935	0.017447	0.018325	0.036957	Micronycteris_hirsuta	147	0	2.87203
392	1	2.75667	793	88.1111	6.85511	2.5673	2.86828	22.9321	0.002792	0.001821	0.001938	0.00442	0.001972	0.001987	0.00205	0.000729	0.007696	0.005021	0.005342	0.012185	Artibeus_lituratus	148	0	2.86828
428	1	9.50813	788	87.5556	6.04382	2.56805	2.85826	14.925	0.002802	0.00184	0.001916	0.003687	0.006802	0.006854	0.007069	0.002516	0.02664	0.017497	0.01822	0.035056	Micronycteris_microtis	149	0	2.85826
408	1	19.2715	781	86.7778	5.92058	2.54882	2.85314	13.5851	0.002688	0.001824	0.00192	0.003346	0.013786	0.013891	0.014328	0.005099	0.051809	0.035156	0.037008	0.064486	Erophylla_sezekorni	150	0	2.85314
399	1	9.90774	794	88.2222	5.97983	2.51489	2.84567	16.7392	0.002613	0.001853	0.001934	0.00302	0.007088	0.007142	0.007366	0.002621	0.025888	0.018363	0.019163	0.029918	Uroderma_bilobatum	151	0	2.84567
161	1	6.72148	553	61.4444	7.05572	1.07043	2.81657	18.2421	0.003204	0.000924	0.001245	0.00477	0.004808	0.004845	0.004997	0.001778	0.021536	0.006214	0.008366	0.032065	Melursus_ursinus	152	0	2.81657
294	1	0.428333	778	86.4444	6.35836	2.43599	2.79873	12.9599	0.00302	0.001821	0.001895	0.004418	0.000306	0.000309	0.000318	0.000113	0.001294	0.00078	0.000812	0.001893	Leopardus_guigna	153	0	2.79873
400	1	11.5	786	87.3333	5.32105	2.67937	2.78784	15.9274	0.002312	0.001807	0.001886	0.002429	0.008227	0.008289	0.00855	0.003043	0.026586	0.020781	0.021693	0.027933	Chiroderma_villosum	154	0	2.78784
420	1	5.7	772	85.7778	6.33294	2.56682	2.78132	17.3332	0.002983	0.001821	0.001863	0.00516	0.004078	0.004109	0.004238	0.001508	0.017005	0.010381	0.010618	0.029411	Phyllostomus_elongatus	155	0	2.78132
419	1	5.7	771	85.6667	5.98347	2.5554	2.76335	16.8455	0.002749	0.001827	0.001863	0.004466	0.004078	0.004109	0.004238	0.001508	0.015668	0.010416	0.010618	0.025457	Phyllostomus_hastatus	156	0	2.76335
286	1	4.088	778	86.4444	7.12075	2.54014	2.75156	22.0047	0.002987	0.001756	0.00186	0.006135	0.002924	0.002947	0.003039	0.001082	0.012211	0.007177	0.007605	0.025079	Leopardus_pardalis	157	0	2.75156
293	1	0.428333	775	86.1111	6.0407	2.61483	2.75156	13.8723	0.002779	0.001794	0.001867	0.003851	0.000306	0.000309	0.000318	0.000113	0.00119	0.000768	0.0008	0.00165	Leopardus_geoffroyi	158	0	2.75156
458	1	5.39219	732	81.3333	5.53079	2.61343	2.75083	15.5033	0.002459	0.001822	0.00182	0.003025	0.003857	0.003887	0.004009	0.001427	0.01326	0.009822	0.009812	0.016309	Myotis_albescens	159	0	2.75083
457	1	5.39219	725	80.5556	6.34333	2.40195	2.74629	24.9695	0.002569	0.001077	0.00182	0.003746	0.003857	0.003887	0.004009	0.001427	0.01385	0.005809	0.009812	0.020197	Myotis_nigricans	160	0	2.74629
454	1	8	722	80.2222	5.34006	2.71338	2.69716	14.1552	0.002286	0.001091	0.001774	0.002491	0.005723	0.005767	0.005948	0.002117	0.018286	0.008727	0.014193	0.019927	Myotis_ridleyi	161	0	2.69716
287	1	4.088	773	85.8889	6.57215	2.67669	2.66973	25.914	0.002531	0.001843	0.001807	0.004099	0.002924	0.002947	0.003039	0.001082	0.010345	0.007532	0.007387	0.016756	Leopardus_wiedii	162	0	2.66973
453	1	8	711	79	4.82348	2.72237	2.66474	10.4825	0.002197	0.001072	0.001744	0.00266	0.005723	0.005767	0.005948	0.002117	0.01758	0.008578	0.01395	0.021284	Myotis_ater	163	0	2.66474
289	1	5.79167	763	84.7778	5.12236	2.49573	2.65732	10.039	0.002358	0.001767	0.001799	0.00337	0.004143	0.004175	0.004306	0.001532	0.013655	0.010233	0.01042	0.019516	Leopardus_colocolo	164	0	2.65732
255	1	10.78	729	81	4.81857	2.51302	2.65302	9.79438	0.002215	0.001143	0.001764	0.002552	0.007711	0.00777	0.008015	0.002852	0.023879	0.012324	0.019016	0.027507	Neofelis_nebulosa	165	0	2.65302
459	1	7.58164	715	79.4444	5.39993	2.63569	2.64619	15.4909	0.00243	0.000999	0.001738	0.005924	0.005424	0.005465	0.005637	0.002006	0.018421	0.007571	0.013179	0.044911	Myotis_simus	166	0	2.64619
402	1	5.1	755	83.8889	4.7837	2.60766	2.64444	11.1101	0.002124	0.001809	0.001797	0.002655	0.003648	0.003676	0.003792	0.001349	0.010833	0.009224	0.009164	0.013541	Carollia_perspicillata	167	0	2.64444
431	1	23.0741	747	83	4.4085	2.54391	2.64199	7.32918	0.00213	0.001822	0.001771	0.002675	0.016506	0.016632	0.017156	0.006105	0.049159	0.042041	0.040856	0.061725	Micronycteris_brachyotis	168	0	2.64199
387	1	17.0633	756	84	4.94857	2.50704	2.64097	15.6154	0.0021	0.001808	0.001804	0.002321	0.012206	0.0123	0.012687	0.004515	0.035826	0.030852	0.03079	0.039606	Sturnira_lilium	169	0	2.64097
403	1	5.1	753	83.6667	4.57743	2.52383	2.64097	8.45102	0.002064	0.001825	0.001798	0.001984	0.003648	0.003676	0.003792	0.001349	0.010529	0.00931	0.00917	0.01012	Carollia_castanea	170	0	2.64097
421	1	14.6	756	84	5.01346	2.72945	2.63115	18.9548	0.002199	0.001828	0.001781	0.002736	0.010444	0.010524	0.010855	0.003863	0.032107	0.026683	0.025999	0.039943	Phyllostomus_discolor	171	0	2.63115
414	1	8.85	750	83.3333	4.82697	2.45948	2.62234	14.1835	0.002261	0.001835	0.001762	0.003725	0.006331	0.006379	0.00658	0.002342	0.020007	0.01624	0.015596	0.032966	Lophostoma_silvicolum	172	0	2.62234
460	1	25	697	77.4444	4.86198	2.62655	2.60149	11.3455	0.002231	0.001028	0.001718	0.003913	0.017884	0.018021	0.018587	0.006615	0.055778	0.025688	0.042941	0.097826	Eptesicus_furinalis	173	0	2.60149
366	1	12.1	571	63.4444	8.05692	1.14553	2.59789	30.5982	0.003329	0.001015	0.001504	0.005592	0.008656	0.008722	0.008996	0.003201	0.04028	0.012287	0.018203	0.067665	Pteropus_vampyrus	174	0	2.59789
367	1	12.1	573	63.6667	7.75863	1.1985	2.59789	18.5871	0.00359	0.001031	0.00151	0.007432	0.008656	0.008722	0.008996	0.003201	0.04344	0.012474	0.018273	0.089932	Pteropus_poliocephalus	175	0	2.59789
307	1	6.1	752	83.5556	4.96105	2.50898	2.59638	10.3037	0.002271	0.001736	0.001745	0.002942	0.004364	0.004397	0.004535	0.001614	0.01385	0.010591	0.010647	0.017947	Puma_yagouaroundi	176	0	2.59638
317	1	4.89	754	83.7778	6.1695	2.60349	2.59253	22.8621	0.002575	0.001114	0.001736	0.004662	0.003498	0.003525	0.003636	0.001294	0.012594	0.005449	0.008491	0.022799	Felis_margarita	177	0	2.59253
415	1	8.85	749	83.2222	4.21265	2.47482	2.5846	7.09157	0.001998	0.001815	0.001753	0.001684	0.006331	0.006379	0.00658	0.002342	0.017684	0.016063	0.015515	0.014904	Lophostoma_brasiliense	178	0	2.5846
422	1	14.6	751	83.4444	4.13468	2.53798	2.5846	6.87503	0.002009	0.001845	0.001753	0.003058	0.010444	0.010524	0.010855	0.003863	0.029338	0.026937	0.025595	0.044651	Mimon_crenulatum	179	0	2.5846
319	1	4.245	747	83	5.17861	2.38143	2.58053	11.7077	0.002266	0.001131	0.001731	0.002749	0.003037	0.00306	0.003156	0.001123	0.00962	0.004801	0.007349	0.011671	Felis_catus	180	0	2.58053
423	1	17.9093	736	81.7778	3.93647	2.49678	2.57959	5.56238	0.001887	0.001855	0.001739	0.001514	0.012811	0.012909	0.013316	0.004739	0.033792	0.033217	0.03114	0.027123	Tonatia_saurophila	181	0	2.57959
302	1	4.51667	749	83.2222	5.24581	2.51388	2.56594	14.5193	0.00236	0.001089	0.001722	0.004591	0.003231	0.003256	0.003358	0.001195	0.01066	0.004921	0.007778	0.020734	Lynx_lynx	182	0	2.56594
424	1	21.3615	732	81.3333	4.58271	2.36174	2.56449	16.9263	0.001919	0.001843	0.001737	0.002016	0.015281	0.015398	0.015882	0.005652	0.041	0.039362	0.037116	0.043062	Trachops_cirrhosus	183	0	2.56449
310	1	5.5	749	83.2222	4.67345	2.44939	2.54153	17.776	0.001967	0.001162	0.001709	0.002067	0.003934	0.003965	0.004089	0.001455	0.010818	0.006393	0.009398	0.011366	Puma_concolor	184	0	2.54153
301	1	4.51667	743	82.5556	4.86491	2.57398	2.53841	12.6966	0.002199	0.001137	0.001709	0.004048	0.003231	0.003256	0.003358	0.001195	0.009931	0.005135	0.007718	0.018284	Lynx_pardinus	185	0	2.53841
320	1	4.245	743	82.5556	4.98027	2.48324	2.53742	12.7355	0.002288	0.001169	0.00171	0.006585	0.003037	0.00306	0.003156	0.001123	0.009715	0.004963	0.00726	0.027953	Felis_silvestris	186	0	2.53742
309	1	3.044	748	83.1111	4.24365	2.47381	2.53655	7.35149	0.001936	0.001159	0.001704	0.001554	0.002178	0.002194	0.002263	0.000805	0.005893	0.003527	0.005186	0.00473	Miracinonyx_studeri	187	0	2.53655
299	1	5.83333	741	82.3333	4.99214	2.53639	2.53506	18.8386	0.002176	0.001113	0.001688	0.003421	0.004173	0.004205	0.004337	0.001543	0.012694	0.006492	0.009848	0.019953	Lynx_canadensis	188	0	2.53506
328	1	3.486	742	82.4444	5.03047	2.37299	2.53306	16.8361	0.002135	0.0011	0.001685	0.002472	0.002494	0.002513	0.002592	0.000922	0.007441	0.003834	0.005874	0.008617	Prionailurus_bengalensis	189	0	2.53306
305	1	6.7	742	82.4444	5.3539	2.41191	2.52819	17.211	0.002047	0.001119	0.001701	0.002459	0.004793	0.00483	0.004981	0.001773	0.013716	0.007495	0.011396	0.016474	Acinonyx_jubatus	190	0	2.52819
329	1	3.486	739	82.1111	4.59942	2.40278	2.52397	9.73175	0.002149	0.00108	0.001672	0.003797	0.002494	0.002513	0.002592	0.000922	0.007491	0.003765	0.005829	0.013235	Prionailurus_viverrinus	191	0	2.52397
313	1	6.18	736	81.7778	5.12628	2.22618	2.52311	27.5842	0.001994	0.001107	0.001675	0.002191	0.004421	0.004455	0.004595	0.001635	0.012323	0.00684	0.010354	0.013542	Felis_chaus	192	0	2.52311
315	1	5.535	739	82.1111	4.23627	2.4511	2.52022	6.92265	0.001977	0.001097	0.001685	0.002247	0.003959	0.00399	0.004115	0.001464	0.010945	0.006074	0.009328	0.012435	Felis_nigripes	193	0	2.52022
282	1	6.155	717	79.6667	4.6157	2.51592	2.51727	8.63037	0.002134	0.001122	0.001649	0.002753	0.004403	0.004437	0.004576	0.001629	0.013134	0.006903	0.01015	0.016944	Caracal_caracal	194	0	2.51727
326	1	4.384	741	82.3333	4.37489	2.39126	2.51246	8.40494	0.001994	0.001108	0.001664	0.002893	0.003136	0.00316	0.00326	0.00116	0.00874	0.004858	0.007297	0.012683	Prionailurus_planiceps	195	0	2.51246
297	1	7.15	732	81.3333	4.3381	2.36469	2.50425	9.0046	0.001963	0.001098	0.001668	0.003207	0.005115	0.005154	0.005316	0.001892	0.014035	0.00785	0.011927	0.022927	Lynx_rufus	196	0	2.50425
281	1	6.155	714	79.3333	4.63818	2.60562	2.47982	14.8352	0.002229	0.001188	0.001638	0.00914	0.004403	0.004437	0.004576	0.001629	0.013719	0.007312	0.010083	0.056256	Caracal_aurata	197	0	2.47982
324	1	5.282	734	81.5556	4.27606	2.43031	2.47982	7.2294	0.001992	0.00111	0.001649	0.002514	0.003778	0.003807	0.003927	0.001398	0.01052	0.005861	0.00871	0.013277	Prionailurus_rubiginosus	198	0	2.47982
279	1	8.51	711	79	4.26362	2.41825	2.47413	7.71123	0.002031	0.001062	0.00162	0.003401	0.006088	0.006134	0.006327	0.002252	0.01728	0.00904	0.01379	0.028946	Leptailurus_serval	199	0	2.47413
322	1	6.18	733	81.4444	4.12905	2.46887	2.47413	7.59612	0.001835	0.001118	0.001644	0.001643	0.004421	0.004455	0.004595	0.001635	0.011342	0.006907	0.010162	0.010154	Otocolobus_manul	200	0	2.47413
249	1	3.994	665	73.8889	5.20324	1.10875	2.45975	11.5349	0.002431	0.001032	0.001555	0.004251	0.002857	0.002879	0.00297	0.001057	0.009709	0.00412	0.006211	0.016979	Xenosmilus_hodsonae	201	0	2.45975
276	1	4.7175	698	77.5556	4.46362	2.54449	2.45975	9.58407	0.002045	0.001051	0.001597	0.003022	0.003375	0.0034	0.003507	0.001248	0.009648	0.004957	0.007534	0.014256	Pardofelis_badia	202	0	2.45975
432	1	29	669	74.3333	4.06657	1.04437	2.43012	6.37693	0.002029	0.001015	0.001615	0.002953	0.020745	0.020904	0.021561	0.007673	0.05885	0.029431	0.046843	0.085639	Desmodus_rotundus	203	0	2.43012
275	1	4.7175	691	76.7778	4.09118	2.40749	2.41639	7.54178	0.001905	0.001027	0.001581	0.002951	0.003375	0.0034	0.003507	0.001248	0.008985	0.004845	0.007458	0.013921	Pardofelis_temminckii	204	0	2.41639
273	1	9.43	686	76.2222	3.89546	2.46077	2.40323	6.56507	0.001802	0.001079	0.001563	0.001988	0.006746	0.006797	0.007011	0.002495	0.016988	0.010175	0.014737	0.018749	Pardofelis_marmorata	205	0	2.40323
244	1	6.343	644	71.5556	4.3037	1.11423	2.38794	7.46426	0.002113	0.001028	0.001505	0.003463	0.004537	0.004572	0.004716	0.001678	0.013402	0.006521	0.009547	0.021968	Smilodon_fatalis	206	0	2.38794
250	1	1.694	642	71.3333	4.41133	1.05889	2.36943	8.1827	0.002121	0.000999	0.001502	0.003697	0.001212	0.001221	0.001259	0.000448	0.003593	0.001693	0.002544	0.006263	Homotherium_crusafonti	207	0	2.36943
245	1	3.683	633	70.3333	4.17182	1.09031	2.36807	7.19905	0.002015	0.000979	0.001452	0.002981	0.002635	0.002655	0.002738	0.000974	0.007421	0.003606	0.005346	0.010977	Megantereon_falconeri	208	0	2.36807
435	1	27.9877	626	69.5556	3.92416	1.05281	2.3669	7.7957	0.001745	0.000968	0.001503	0.001669	0.020021	0.020174	0.020809	0.007405	0.04883	0.027102	0.042055	0.046724	Scotophilus_kuhlii	209	0	2.3669
239	1	5.984	626	69.5556	4.12158	1.03153	2.33578	7.53033	0.001909	0.001007	0.001452	0.002336	0.004281	0.004313	0.004449	0.001583	0.011422	0.006024	0.008686	0.013981	Metailurus_parvulus	210	0	2.33578
462	1	23.1333	608	67.5556	4.09114	1.05251	2.3169	7.78812	0.001944	0.000911	0.001464	0.003661	0.016548	0.016675	0.0172	0.006121	0.044982	0.021075	0.033874	0.084688	Molossus_sinaloae	211	0	2.3169
544	1	10	521	57.8889	4.95565	0.994662	2.31657	10.1719	0.002182	0.000897	0.00132	0.002198	0.007154	0.007208	0.007435	0.002646	0.021815	0.008968	0.013198	0.021979	Propithecus_diadema	212	0	2.31657
247	1	2.294	635	70.5556	4.1018	1.08876	2.31456	7.83924	0.001919	0.000972	0.001443	0.002938	0.001641	0.001654	0.001706	0.000607	0.004403	0.002229	0.003311	0.00674	Homotherium_nestianus	213	0	2.31456
463	1	23.1333	607	67.4444	3.72989	1.01891	2.29845	6.64402	0.001667	0.000938	0.001443	0.001661	0.016548	0.016675	0.0172	0.006121	0.038555	0.021703	0.033371	0.038421	Mops_mops	214	0	2.29845
380	1	2.76755	617	68.5556	3.75985	1.02554	2.27794	6.59925	0.001769	0.000959	0.001417	0.002566	0.00198	0.001995	0.002058	0.000732	0.004897	0.002655	0.003923	0.007101	Noctilio_leporinus	215	0	2.27794
241	1	7.538	625	69.4444	3.8576	1.07774	2.27331	6.74677	0.001779	0.001005	0.001406	0.002214	0.005392	0.005434	0.005605	0.001994	0.013413	0.007578	0.010595	0.016687	Dinofelis_cristata	216	0	2.27331
381	1	2.76755	610	67.7778	3.61224	1.0162	2.26603	6.10858	0.001683	0.00096	0.001407	0.002241	0.00198	0.001995	0.002058	0.000732	0.004658	0.002656	0.003893	0.006203	Noctilio_albiventris	217	0	2.26603
252	1	6.31	613	68.1111	3.5913	1.07594	2.21826	6.29124	0.001578	0.00099	0.001388	0.00122	0.004514	0.004548	0.004691	0.00167	0.00996	0.006248	0.008761	0.007701	FAM_62192	218	0	2.21826
558	1	13.4	475	52.7778	5.77328	1.1774	1.41995	20.333	0.002385	0.000895	0.001127	0.004408	0.009586	0.009659	0.009963	0.003545	0.031962	0.011995	0.015106	0.059064	Hapalemur_griseus	219	0	1.41995
547	1	37.3	472	52.4444	4.61426	1.09954	1.2816	10.0089	0.002176	0.000825	0.001107	0.005528	0.026683	0.026887	0.027733	0.009869	0.081183	0.030763	0.041278	0.206182	Lepilemur_leucopus	220	0	1.2816
557	1	13.4	467	51.8889	4.79106	1.1094	1.21055	9.53861	0.002151	0.000869	0.00111	0.003164	0.009586	0.009659	0.009963	0.003545	0.02883	0.011645	0.014881	0.042392	Lemur_catta	221	0	1.21055
545	1	25.3449	462	51.3333	4.0049	1.03736	1.12914	6.25132	0.001802	0.000868	0.001116	0.001541	0.018131	0.018269	0.018844	0.006706	0.045682	0.022001	0.028284	0.039044	Avahi_laniger	222	0	1.12914
10	1	12.6	212	23.5556	2.16608	1.02222	1	4.05097	0.000934	0.000718	0.000824	0.001246	0.009013	0.009082	0.009368	0.003334	0.011768	0.009048	0.010382	0.0157	Nyctereutes_procyonoides	223	0	1
14	1	6.08397	267	29.6667	2.29915	0.998221	1	4.44665	0.001	0.000726	0.000828	0.001362	0.004352	0.004385	0.004523	0.00161	0.006086	0.004417	0.005038	0.008288	Chrysocyon_brachyurus	224	0	1
15	1	6.08397	279	31	2.30942	0.978653	1	4.3502	0.001026	0.000744	0.000826	0.001447	0.004352	0.004385	0.004523	0.00161	0.006243	0.004524	0.005028	0.008802	Cuon_alpinus	225	0	1
17	1	5.45897	264	29.3333	2.337	0.999884	1	6.25408	0.000952	0.000743	0.000828	0.00082	0.003905	0.003935	0.004059	0.001444	0.005195	0.004057	0.00452	0.004477	Lycaon_pictus	226	0	1
18	1	5.45897	266	29.5556	2.39962	1.37531	1	6.32289	0.001003	0.000738	0.000828	0.001186	0.003905	0.003935	0.004059	0.001444	0.005477	0.00403	0.004517	0.006476	Speothos_venaticus	227	0	1
23	1	2.80932	309	34.3333	2.71367	1.04898	1	5.89487	0.00114	0.00074	0.000858	0.001112	0.00201	0.002025	0.002089	0.000743	0.003202	0.00208	0.002412	0.003125	Lycalopex_vetulus	228	0	1
26	1	1.42815	402	44.6667	4.21628	0.97517	1	10.6284	0.001843	0.000788	0.000934	0.003095	0.001022	0.001029	0.001062	0.000378	0.002632	0.001125	0.001333	0.004421	Lycalopex_culpaeus	229	0	1
27	1	1.42815	357	39.6667	3.13155	1.04475	1	6.62297	0.001419	0.000759	0.00089	0.002307	0.001022	0.001029	0.001062	0.000378	0.002027	0.001084	0.001271	0.003295	Lycalopex_gymnocercus	230	0	1
28	1	1.59018	393	43.6667	4.62971	1.05132	1	15.7827	0.001982	0.000814	0.000914	0.003976	0.001138	0.001146	0.001182	0.000421	0.003152	0.001294	0.001453	0.006323	Lycalopex_griseus	231	0	1
29	1	4.03732	298	33.1111	2.58143	0.988086	1	5.12112	0.00114	0.000732	0.000849	0.001785	0.002888	0.00291	0.003002	0.001068	0.004601	0.002957	0.003428	0.007205	Cerdocyon_thous	232	0	1
30	1	4.3022	283	31.4444	2.48184	1.00995	1	4.94538	0.001048	0.000735	0.000846	0.001145	0.003078	0.003101	0.003199	0.001138	0.00451	0.003161	0.00364	0.004926	Atelocynus_microtis	233	0	1
33	1	3.22927	314	34.8889	2.84196	1.04282	1	7.50201	0.00136	0.000795	0.000863	0.004728	0.00231	0.002328	0.002401	0.000854	0.00439	0.002568	0.002787	0.015268	Canis_adustus	234	0	1
34	1	3.22927	332	36.8889	2.87681	1.03102	1	5.11405	0.001368	0.000755	0.000876	0.001929	0.00231	0.002328	0.002401	0.000854	0.004418	0.002437	0.002829	0.006229	Canis_mesomelas	235	0	1
38	1	2.2232	375	41.6667	3.30847	1.02682	1	6.81869	0.001558	0.000774	0.000898	0.002283	0.00159	0.001603	0.001653	0.000588	0.003463	0.00172	0.001996	0.005076	Canis_latrans	236	0	1
39	1	2.2232	379	42.1111	3.77461	1.2015	1	15.4647	0.001593	0.000762	0.000898	0.002275	0.00159	0.001603	0.001653	0.000588	0.003543	0.001694	0.001998	0.005059	Canis_aureus	237	0	1
41	1	11.1	237	26.3333	2.64435	1.16793	1	7.16764	0.001068	0.000735	0.000833	0.001245	0.00794	0.008001	0.008253	0.002937	0.011858	0.00816	0.009246	0.01382	Otocyon_megalotis	238	0	1
43	1	11.1	231	25.6667	2.62474	1.0585	1	7.53446	0.001027	0.000743	0.000829	0.001298	0.00794	0.008001	0.008253	0.002937	0.011397	0.008249	0.009202	0.014403	Vulpes_ferrilata	239	0	1
48	1	1.8065	301	33.4444	3.59059	0.877467	1	20.7318	0.001348	0.000743	0.000846	0.002248	0.001292	0.001302	0.001343	0.000478	0.002435	0.001342	0.001528	0.004061	Vulpes_vulpes	240	0	1
49	1	1.8065	300	33.3333	3.53659	1.05603	1	16.8942	0.001394	0.000743	0.000848	0.002902	0.001292	0.001302	0.001343	0.000478	0.002519	0.001343	0.001532	0.005242	Vulpes_rueppellii	241	0	1
51	1	2.25	278	30.8889	2.69124	1.00031	1	7.67544	0.001167	0.000712	0.000827	0.002705	0.00161	0.001622	0.001673	0.000595	0.002627	0.001601	0.001861	0.006086	Vulpes_lagopus	242	0	1
52	1	2.25	277	30.7778	2.64485	0.995104	1	7.36969	0.001139	0.00077	0.000827	0.002512	0.00161	0.001622	0.001673	0.000595	0.002563	0.001733	0.001861	0.005652	Vulpes_velox	243	0	1
53	1	5.33798	242	26.8889	2.24622	1.0937	1	4.48848	0.000922	0.00073	0.000827	0.00064	0.003819	0.003848	0.003969	0.001412	0.004923	0.003897	0.004415	0.003414	Vulpes_zerda	244	0	1
54	1	6.8173	242	26.8889	2.24608	1.02561	1	4.1205	0.000981	0.000741	0.000824	0.001107	0.004877	0.004914	0.005069	0.001804	0.006689	0.005049	0.005621	0.007546	Vulpes_chama	245	0	1
55	1	12.6	213	23.6667	2.59885	1.1964	1	11.7174	0.000964	0.000741	0.000824	0.001086	0.009013	0.009082	0.009368	0.003334	0.012151	0.00933	0.010382	0.013683	Urocyon_cinereoargenteus	246	0	1
61	1	22.707	227	25.2222	2.45215	1.23479	1	8.32813	0.000952	0.000726	0.000815	0.000986	0.016243	0.016368	0.016883	0.006008	0.021623	0.016478	0.018506	0.022387	Potos_flavus	247	0	1
65	1	3.40564	279	31	3.27575	0.964513	1	10.9281	0.001268	0.000756	0.000839	0.002158	0.002436	0.002455	0.002532	0.000901	0.004318	0.002574	0.002859	0.007351	Procyon_cancrivorus	248	0	1
66	1	3.40564	309	34.3333	3.66532	1.07504	1	11.7795	0.001437	0.000742	0.000852	0.002177	0.002436	0.002455	0.002532	0.000901	0.004895	0.002526	0.002902	0.007415	Procyon_lotor	249	0	1
68	1	7.29982	281	31.2222	2.72401	0.967997	1	7.07885	0.001102	0.000747	0.000832	0.001372	0.005222	0.005262	0.005427	0.001931	0.008042	0.005454	0.006077	0.010016	Bassariscus_sumichrasti	250	0	1
69	1	7.29982	275	30.5556	3.02566	0.889538	1	11.2353	0.001111	0.000752	0.000829	0.001651	0.005222	0.005262	0.005427	0.001931	0.00811	0.005487	0.006048	0.012053	Bassariscus_astutus	251	0	1
72	1	9.2	274	30.4444	2.90627	1.08675	1	12.3364	0.001052	0.000728	0.000829	0.001254	0.006581	0.006632	0.00684	0.002434	0.009676	0.006693	0.007627	0.011534	Nasua_nasua	252	0	1
73	1	9.2	287	31.8889	3.81487	0.887442	1	19.2287	0.001225	0.00075	0.000839	0.001847	0.006581	0.006632	0.00684	0.002434	0.011273	0.006904	0.007714	0.016992	Nasuella_olivacea	253	0	1
75	1	8.54257	290	32.2222	3.18251	1.00159	1	9.63073	0.001308	0.00072	0.000838	0.002361	0.006111	0.006158	0.006351	0.00226	0.011176	0.006149	0.007159	0.020167	Bassaricyon_gabbii	254	0	1
76	1	8.54257	270	30	2.64318	1.06015	1	7.20097	0.001099	0.000743	0.000831	0.001402	0.006111	0.006158	0.006351	0.00226	0.009391	0.006343	0.007103	0.011976	Bassaricyon_alleni	255	0	1
82	1	10.7648	245	27.2222	2.56486	1.0658	1	7.98277	0.000976	0.000716	0.000811	0.001368	0.007701	0.007759	0.008004	0.002848	0.010501	0.007711	0.00873	0.014726	Eira_barbara	256	0	1
86	1	8.84	269	29.8889	2.20293	1.07541	1	4.6577	0.000911	0.000721	0.000806	0.000846	0.006324	0.006372	0.006573	0.002339	0.008052	0.006372	0.007125	0.00748	Martes_flavigula	257	0	1
89	1	3.73141	296	32.8889	3.02568	1.64738	1	18.2685	0.000985	0.000742	0.000813	0.001095	0.002669	0.00269	0.002774	0.000987	0.003675	0.00277	0.003034	0.004085	Martes_americana	258	0	1
90	1	3.73141	300	33.3333	2.76432	0.817108	1	13.2493	0.001056	0.000723	0.000818	0.001614	0.002669	0.00269	0.002774	0.000987	0.003942	0.002696	0.003052	0.006024	Martes_martes	259	0	1
91	1	4.15409	288	32	2.75461	2.24454	1	13.2044	0.001037	0.000736	0.000814	0.001239	0.002972	0.002994	0.003089	0.001099	0.00431	0.003057	0.003381	0.005146	Martes_foina	260	0	1
92	1	8.84	260	28.8889	2.80616	1.46515	1	16.3436	0.000955	0.000732	0.000806	0.001428	0.006324	0.006372	0.006573	0.002339	0.008439	0.006467	0.007121	0.012624	Martes_pennanti	261	0	1
93	1	10.3798	251	27.8889	2.18411	1.06109	1	4.2001	0.000921	0.000729	0.000806	0.000924	0.007425	0.007482	0.007717	0.002746	0.009564	0.007568	0.008371	0.00959	Gulo_gulo	262	0	1
97	1	9.5353	244	27.1111	2.15066	1.04413	1	4.10469	0.00089	0.000735	0.000814	0.000548	0.006821	0.006873	0.007089	0.002523	0.008486	0.007008	0.007762	0.00523	Pteronura_brasiliensis	263	0	1
104	1	3.33284	323	35.8889	2.76215	0.931865	1	7.47057	0.001169	0.000744	0.000829	0.00198	0.002384	0.002402	0.002478	0.000882	0.003896	0.002481	0.002763	0.006599	Aonyx_cinerea	264	0	1
105	1	3.33284	327	36.3333	3.14313	1.04935	1	10.8116	0.001243	0.000781	0.000832	0.002853	0.002384	0.002402	0.002478	0.000882	0.004143	0.002603	0.002775	0.009508	Aonyx_capensis	265	0	1
106	1	4.21045	332	36.8889	2.9207	0.966975	1	8.16608	0.001247	0.000756	0.000839	0.001837	0.003012	0.003035	0.00313	0.001114	0.00525	0.003184	0.00353	0.007733	Lutrogale_perspicillata	266	0	1
108	1	3.13216	313	34.7778	2.43468	0.986669	1	4.40711	0.001089	0.000741	0.000828	0.001344	0.002241	0.002258	0.002329	0.000829	0.003409	0.002321	0.002593	0.00421	Lutra_sumatrana	267	0	1
109	1	3.13216	309	34.3333	2.57885	0.959013	1	6.86835	0.001175	0.000766	0.000825	0.00378	0.002241	0.002258	0.002329	0.000829	0.003681	0.002398	0.002585	0.011839	Lutra_lutra	268	0	1
110	1	5.43551	285	31.6667	2.29497	1.00404	1	4.29133	0.001002	0.000739	0.000824	0.001149	0.003888	0.003918	0.004041	0.001438	0.005445	0.004017	0.004482	0.006248	Hydrictis_maculicollis	269	0	1
111	1	8.47	309	34.3333	2.82896	0.979632	1	6.4128	0.001277	0.000737	0.000839	0.001898	0.006059	0.006105	0.006297	0.002241	0.010814	0.006243	0.007106	0.016075	Enhydra_lutris	270	0	1
113	1	4.70147	273	30.3333	2.23199	1.05675	1	4.19106	0.000981	0.000729	0.000824	0.001462	0.003363	0.003389	0.003496	0.001244	0.004614	0.003426	0.003876	0.006875	Lontra_canadensis	271	0	1
115	1	2.36542	289	32.1111	2.47119	1.00399	1	5.05645	0.001078	0.00074	0.000826	0.001558	0.001692	0.001705	0.001759	0.000626	0.002551	0.001751	0.001954	0.003684	Lontra_felina	272	0	1
116	1	2.36542	295	32.7778	2.52405	1.02972	1	4.99163	0.001149	0.000749	0.000829	0.001992	0.001692	0.001705	0.001759	0.000626	0.002718	0.001772	0.001962	0.004713	Lontra_longicaudis	273	0	1
118	1	14	270	30	2.36407	1.00761	1	4.80438	0.001012	0.000728	0.000826	0.001168	0.010015	0.010092	0.010409	0.003704	0.014162	0.010185	0.011563	0.016351	Galictis_cuja	274	0	1
120	1	6.69313	312	34.6667	3.00133	0.991647	1	6.11764	0.001351	0.000749	0.000849	0.002013	0.004788	0.004825	0.004976	0.001771	0.009042	0.005011	0.005686	0.013476	Ictonyx_libyca	275	0	1
121	1	6.69313	297	33	2.98882	0.94629	1	8.55576	0.001293	0.000753	0.000832	0.002741	0.004788	0.004825	0.004976	0.001771	0.008653	0.005039	0.005572	0.018349	Ictonyx_striatus	276	0	1
125	1	5.56667	307	34.1111	2.62266	0.963274	1	5.23656	0.001153	0.000746	0.000833	0.001318	0.003982	0.004013	0.004139	0.001473	0.006419	0.004153	0.004639	0.007336	Mustela_africana	277	0	1
126	1	5.56667	305	33.8889	2.51932	1.00707	1	4.5492	0.001123	0.000743	0.000834	0.001262	0.003982	0.004013	0.004139	0.001473	0.006253	0.004135	0.004642	0.007023	Mustela_frenata	278	0	1
127	1	6.48735	279	31	2.48555	1.00651	1	5.62851	0.00105	0.00073	0.000828	0.001342	0.004641	0.004676	0.004823	0.001716	0.006809	0.004733	0.005368	0.008709	Neovison_vison	279	0	1
131	1	4.15886	306	34	2.45068	1.00771	1	4.49927	0.001074	0.000748	0.000833	0.001176	0.002975	0.002998	0.003092	0.0011	0.004467	0.003113	0.003466	0.004892	Mustela_nivalis	280	0	1
132	1	4.15886	317	35.2222	2.58732	0.992737	1	4.64375	0.001169	0.000755	0.000839	0.001485	0.002975	0.002998	0.003092	0.0011	0.004862	0.00314	0.003491	0.006175	Mustela_altaica	281	0	1
134	1	1.86	330	36.6667	2.89186	1.01768	1	6.6203	0.001332	0.000786	0.000849	0.003017	0.001331	0.001341	0.001383	0.000492	0.002478	0.001461	0.001578	0.005612	Mustela_putorius	282	0	1
135	1	1.86	352	39.1111	3.63596	1.02131	1	17.761	0.001577	0.000751	0.000861	0.003071	0.001331	0.001341	0.001383	0.000492	0.002933	0.001396	0.001601	0.005712	Mustela_lutreola	283	0	1
136	1	5.6162	283	31.4444	2.73462	0.941617	1	6.98602	0.001136	0.000741	0.000828	0.001712	0.004018	0.004048	0.004176	0.001486	0.006379	0.004162	0.004647	0.009613	Mustela_erminea	284	0	1
137	1	20.4	237	26.3333	2.15018	1.0611	1	4.04752	0.000922	0.000729	0.000808	0.000956	0.014593	0.014705	0.015167	0.005398	0.018812	0.014878	0.016473	0.019499	Meles_meles	285	0	1
138	1	22.4	243	27	2.36655	1.06011	1	7.14428	0.000934	0.000733	0.000815	0.000949	0.016024	0.016146	0.016654	0.005927	0.020922	0.016424	0.01826	0.021267	Mellivora_capensis	286	0	1
139	1	22.4	226	25.1111	2.354	1.1218	1	7.41859	0.000913	0.000729	0.00081	0.000728	0.016024	0.016146	0.016654	0.005927	0.02045	0.016329	0.018144	0.016302	Taxidea_taxus	287	0	1
140	1	34.0647	212	23.5556	2.20673	1.05564	1	4.16322	0.000942	0.000725	0.000818	0.000941	0.024368	0.024555	0.025327	0.009013	0.032079	0.024709	0.027878	0.032072	Ailurus_fulgens	288	0	1
142	1	19.451	280	31.1111	2.99532	1.03637	1	7.19862	0.001348	0.000752	0.000851	0.002133	0.013914	0.014021	0.014462	0.005146	0.026223	0.014622	0.016544	0.041497	Mydaus_javanensis	289	0	1
145	1	3.17171	309	34.3333	3.31355	1.01422	1	6.97865	0.001505	0.000744	0.000858	0.002265	0.002269	0.002286	0.002358	0.000839	0.004773	0.00236	0.002721	0.007185	Mephitis_mephitis	290	0	1
146	1	3.17171	289	32.1111	3.19854	0.977315	1	9.20631	0.001317	0.000743	0.000849	0.002034	0.002269	0.002286	0.002358	0.000839	0.004178	0.002356	0.002691	0.00645	Mephitis_macroura	291	0	1
147	1	11.3619	279	31	3.00365	1.08864	1	8.52132	0.001254	0.000751	0.000846	0.001752	0.008128	0.00819	0.008448	0.003006	0.014249	0.00853	0.009614	0.019902	Conepatus_semistriatus	292	0	1
149	1	24.4687	275	30.5556	2.81432	1.07399	1	9.37479	0.001136	0.000743	0.000849	0.001351	0.017504	0.017638	0.018193	0.006474	0.027802	0.018174	0.020774	0.03305	Ailuropoda_melanoleuca	293	0	1
162	1	15.5165	362	40.2222	3.24228	1.01895	1	6.11248	0.001497	0.000776	0.000913	0.001726	0.0111	0.011185	0.011537	0.004105	0.023233	0.012041	0.014159	0.02678	Tremarctos_ornatus	294	0	1
164	1	46.9168	201	22.3333	2.14434	1.02857	1	4.0184	0.000882	0.000728	0.000814	0.00043	0.033562	0.033819	0.034883	0.012413	0.041387	0.034177	0.03819	0.020173	Nandinia_binotata	295	0	1
172	1	12.765	287	31.8889	3.47596	0.980922	1	18.3259	0.001243	0.000726	0.000837	0.002163	0.009131	0.009201	0.009491	0.003377	0.015864	0.009261	0.010691	0.027604	Mungos_mungo	296	0	1
173	1	12.765	271	30.1111	2.64907	1.00547	1	6.63488	0.001106	0.000737	0.000825	0.001838	0.009131	0.009201	0.009491	0.003377	0.014124	0.009411	0.010537	0.023462	Crossarchus_platycephalus	297	0	1
177	1	13.3	268	29.7778	3.28822	1.36549	1	28.5704	0.001064	0.000751	0.000816	0.003097	0.009514	0.009587	0.009889	0.003519	0.01415	0.009986	0.010849	0.041192	Cynictis_penicillata	298	0	1
178	1	13.3	267	29.6667	2.46524	1.15537	1	7.17622	0.001	0.000718	0.000808	0.001685	0.009514	0.009587	0.009889	0.003519	0.013302	0.009545	0.010746	0.022416	Bdeogale_crassicauda	299	0	1
180	1	15.4	284	31.5556	2.58667	0.954035	1	6.64202	0.001049	0.000736	0.000826	0.001344	0.011016	0.011101	0.01145	0.004075	0.016153	0.011329	0.012719	0.020692	Herpestes_ichneumon	300	0	1
183	1	4.4	306	34	3.75951	1.18292	1	36.6717	0.001173	0.000732	0.000828	0.002163	0.003148	0.003172	0.003271	0.001164	0.005162	0.00322	0.003641	0.009516	Herpestes_auropunctatus	301	0	1
184	1	4.4	299	33.2222	5.0068	1.76392	1	60.8978	0.001397	0.000844	0.000826	0.006667	0.003148	0.003172	0.003271	0.001164	0.006145	0.003714	0.003634	0.029336	Herpestes_edwardsii	302	0	1
185	1	8.74667	285	31.6667	2.44047	24.7985	1	5.84466	0.000995	0.000722	0.000823	0.001323	0.006257	0.006305	0.006503	0.002314	0.008703	0.006316	0.007199	0.011572	Herpestes_fuscus	303	0	1
187	1	13.3875	266	29.5556	2.39965	1.04066	1	5.09265	0.001021	0.000725	0.000815	0.001535	0.009577	0.00965	0.009954	0.003542	0.01367	0.0097	0.010913	0.020552	Ichneumia_albicauda	304	0	1
188	1	13.3875	260	28.8889	2.32011	1.02893	1	5.00252	0.000961	0.00073	0.000811	0.001022	0.009577	0.00965	0.009954	0.003542	0.012871	0.009773	0.010864	0.013684	Rhynchogale_melleri	305	0	1
189	1	19.8333	253	28.1111	2.34154	1.05378	1	4.74801	0.000987	0.000732	0.000823	0.001052	0.014188	0.014296	0.014746	0.005248	0.019576	0.014522	0.016323	0.020864	Galerella_pulverulenta	306	0	1
192	1	23.6	300	33.3333	2.44982	1.0125	1	4.54923	0.001091	0.000731	0.000831	0.001597	0.016882	0.017011	0.017547	0.006244	0.025751	0.017256	0.019612	0.037689	Cryptoprocta_ferox	307	0	1
194	1	12.4767	315	35	2.4326	1.0285	1	4.35889	0.001102	0.000753	0.000829	0.001504	0.008925	0.008993	0.009276	0.003301	0.013748	0.009393	0.010349	0.018762	Galidia_elegans	308	0	1
195	1	12.4767	319	35.4444	2.4169	0.97328	1	4.28049	0.001094	0.000732	0.000831	0.001303	0.008925	0.008993	0.009276	0.003301	0.01365	0.009136	0.010362	0.016255	Salanoia_concolor	309	0	1
197	1	10.05	464	51.5556	5.92697	0.971934	1	13.0757	0.002946	0.000881	0.000999	0.004888	0.007189	0.007244	0.007472	0.002659	0.02961	0.008859	0.01004	0.04912	Fossa_fossana	310	0	1
201	1	8.93	350	38.8889	4.89438	1.11451	1	18.0664	0.002127	0.000799	0.000869	0.005328	0.006388	0.006437	0.006639	0.002363	0.018995	0.007136	0.007756	0.047579	Crocuta_crocuta	311	0	1
203	1	6.3425	356	39.5556	5.27484	1.11888	1	21.7967	0.002116	0.000732	0.00087	0.004758	0.004537	0.004572	0.004716	0.001678	0.013421	0.004641	0.005518	0.030176	Hyaena_hyaena	312	0	1
204	1	6.3425	358	39.7778	4.84008	1.14408	1	17.7344	0.001993	0.00074	0.000873	0.003349	0.004537	0.004572	0.004716	0.001678	0.012638	0.004694	0.005539	0.021241	Parahyaena_brunnea	313	0	1
207	1	39.9984	220	24.4444	2.15275	1.02983	1	4.11244	0.000884	0.000739	0.000808	0.000641	0.028613	0.028832	0.029739	0.010583	0.035347	0.02955	0.032299	0.025632	Prionodon_linsang	314	0	1
210	1	22.9075	246	27.3333	2.31553	1.07947	1	4.79371	0.000929	0.00073	0.000817	0.000748	0.016387	0.016512	0.017032	0.006061	0.021276	0.016722	0.018715	0.017133	Cynogale_bennettii	315	0	1
212	1	19.8667	254	28.2222	2.28287	1.04589	1	4.40635	0.000952	0.00074	0.000818	0.000919	0.014212	0.01432	0.014771	0.005256	0.018916	0.014693	0.016258	0.018252	Arctogalidia_trivirgata	316	0	1
216	1	8.8	368	40.8889	3.79956	0.991204	1	8.92534	0.001708	0.000757	0.000891	0.002481	0.006295	0.006343	0.006543	0.002328	0.015034	0.006658	0.007837	0.021835	Paradoxurus_hermaphroditus	317	0	1
217	1	8.8	367	40.7778	4.39171	0.932743	1	13.651	0.00185	0.00074	0.000888	0.003679	0.006295	0.006343	0.006543	0.002328	0.016282	0.006516	0.007813	0.032376	Macrogalidia_musschenbroekii	318	0	1
218	1	10.4925	297	33	2.71171	1.04521	1	6.04042	0.00118	0.000755	0.000831	0.001865	0.007506	0.007563	0.007801	0.002776	0.01238	0.007922	0.008725	0.019567	Paguma_larvata	319	0	1
219	1	13.6333	261	29	2.42633	1.05262	1	5.70176	0.00102	0.000746	0.000823	0.001474	0.009753	0.009827	0.010136	0.003607	0.01391	0.010168	0.011214	0.020102	Arctictis_binturong	320	0	1
222	1	6	295	32.7778	2.7077	0.98704	1	5.17667	0.001233	0.00073	0.000839	0.001702	0.004292	0.004325	0.004461	0.001588	0.007397	0.004377	0.005031	0.010209	Genetta_tigrina	321	0	1
223	1	6	308	34.2222	3.91569	1.08558	1	18.0731	0.00152	0.00074	0.000844	0.003005	0.004292	0.004325	0.004461	0.001588	0.009119	0.004437	0.005064	0.01803	Genetta_genetta	322	0	1
227	1	4.86667	269	29.8889	2.54147	1.09964	1	9.11112	0.000974	0.00074	0.000806	0.001346	0.003481	0.003508	0.003618	0.001288	0.00474	0.003602	0.003923	0.006549	Viverra_tangalunga	323	0	1
229	1	3.88667	292	32.4444	2.68917	0.717372	1	8.34582	0.001126	0.000732	0.000817	0.001758	0.00278	0.002802	0.00289	0.001028	0.004377	0.002843	0.003175	0.006831	Viverra_zibetha	324	0	1
230	1	3.88667	287	31.8889	2.55229	3.06558	1	8.29841	0.001018	0.000732	0.000816	0.001285	0.00278	0.002802	0.00289	0.001028	0.003957	0.002846	0.00317	0.004993	Viverra_megaspila	325	0	1
231	1	12.3533	261	29	2.33685	1.05052	1	5.78433	0.000943	0.000734	0.000806	0.000853	0.008837	0.008905	0.009185	0.003269	0.01165	0.009062	0.009957	0.010542	Civettictis_civetta	326	0	1
232	1	14.49	251	27.8889	2.30025	1.01945	1	4.69692	0.000977	0.000717	0.000808	0.001418	0.010365	0.010445	0.010773	0.003834	0.01416	0.010395	0.011701	0.020542	Viverricula_indica	327	0	1
234	1	11.6	279	31	2.52242	0.992915	1	5.31901	0.001048	0.000734	0.000849	0.00112	0.008298	0.008362	0.008625	0.003069	0.012158	0.008516	0.009843	0.01299	Proailurus_lemanensis	328	0	1
236	1	8	388	43.1111	3.1097	0.968368	1	6.27193	0.00137	0.00079	0.00096	0.001893	0.005723	0.005767	0.005948	0.002117	0.010959	0.006316	0.007677	0.01514	Hyperailurictis_validus	329	0	1
331	1	40.0242	446	49.5556	12.5384	1.24054	1	61.473	0.005585	0.000778	0.001034	0.026228	0.028631	0.02885	0.029758	0.01059	0.223526	0.031136	0.041405	1.04977	Tayassu_pecari	330	0	1
341	1	18	395	43.8889	2.95729	0.9471	1	6.76877	0.001284	0.000774	0.000916	0.001638	0.012876	0.012975	0.013383	0.004763	0.023113	0.01393	0.016497	0.029486	Rhinolophus_robinsoni	331	0	1
342	1	18	390	43.3333	3.0554	0.971243	1	6.43112	0.001309	0.000785	0.000914	0.001776	0.012876	0.012975	0.013383	0.004763	0.023559	0.014126	0.016449	0.031969	Rhinolophus_sedulus	332	0	1
343	1	21.6041	375	41.6667	2.78051	1.04038	1	5.65859	0.001182	0.000791	0.000902	0.001109	0.015455	0.015573	0.016063	0.005716	0.025535	0.017085	0.019487	0.023957	Rhinolophus_lepidus	333	0	1
345	1	9.55	377	41.8889	2.87521	1.03098	1	5.98755	0.001273	0.000787	0.000904	0.00225	0.006832	0.006884	0.0071	0.002527	0.012159	0.007517	0.008628	0.021487	Rhinolophus_stheno	334	0	1
346	1	9.55	381	42.3333	2.71962	1.0049	1	5.26128	0.001173	0.000783	0.000905	0.00113	0.006832	0.006884	0.0071	0.002527	0.011205	0.007477	0.008643	0.010795	Rhinolophus_affinis	335	0	1
347	1	30.3	363	40.3333	2.61035	1.02754	1	4.55311	0.001115	0.000779	0.000907	0.000673	0.021675	0.021841	0.022528	0.008017	0.033795	0.023612	0.027497	0.020382	Rhinolophus_trifoliatus	336	0	1
348	1	30.3	362	40.2222	3.11834	0.992402	1	6.23615	0.001386	0.000781	0.000919	0.002338	0.021675	0.021841	0.022528	0.008017	0.041992	0.023673	0.027831	0.070831	Rhinolophus_luctus	337	0	1
352	1	32	452	50.2222	5.75698	1.25551	1	22.4215	0.002358	0.000815	0.001057	0.005163	0.022891	0.023066	0.023792	0.008467	0.075447	0.026095	0.033824	0.165215	Hipposideros_galeritus	338	0	1
353	1	32	397	44.1111	4.18931	1.07785	1	16.9926	0.001763	0.000811	0.000973	0.005175	0.022891	0.023066	0.023792	0.008467	0.056426	0.025962	0.031152	0.1656	Hipposideros_cervinus	339	0	1
354	1	32	372	41.3333	3.22327	0.926856	1	9.33324	0.00137	0.000765	0.000923	0.002869	0.022891	0.023066	0.023792	0.008467	0.043832	0.024475	0.029536	0.0918	Hipposideros_ridleyi	340	0	1
356	1	32.2	361	40.1111	2.85499	1.02355	1	5.33117	0.001272	0.000778	0.000913	0.00179	0.023034	0.02321	0.023941	0.00852	0.040973	0.025039	0.029399	0.057651	Hipposideros_diadema	341	0	1
358	1	32.2	365	40.5556	2.82468	1.01681	1	5.62617	0.001206	0.000778	0.000905	0.001307	0.023034	0.02321	0.023941	0.00852	0.038844	0.025049	0.029145	0.042072	Hipposideros_bicolor	342	0	1
360	1	22.05	379	42.1111	2.91494	0.998397	1	5.60856	0.001297	0.000781	0.00092	0.001547	0.015773	0.015894	0.016394	0.005834	0.0286	0.017219	0.020275	0.034118	Hipposideros_larvatus	343	0	1
361	1	22.05	366	40.6667	3.04847	1.02338	1	6.40074	0.001334	0.000778	0.000911	0.001944	0.015773	0.015894	0.016394	0.005834	0.029417	0.017166	0.020088	0.042866	Hipposideros_lylei	344	0	1
363	1	25.45	419	46.5556	4.18437	0.961778	1	10.84	0.001772	0.000813	0.001015	0.002723	0.018206	0.018345	0.018922	0.006734	0.045098	0.0207	0.025832	0.0693	Cynopterus_brachyotis	345	0	1
374	1	45.5257	443	49.2222	3.15999	1.03218	1	5.57308	0.001362	0.000823	0.001045	0.001371	0.032567	0.032816	0.033848	0.012045	0.062008	0.03748	0.047597	0.062425	Taphozous_melanopogon	346	0	1
375	1	45.5257	449	49.8889	3.46694	1.01174	1	7.09867	0.001516	0.000839	0.001054	0.002212	0.032567	0.032816	0.033848	0.012045	0.069006	0.038176	0.047977	0.100717	Emballonura_monticola	347	0	1
376	1	54.0553	440	48.8889	3.31692	0.924555	1	8.43439	0.001359	0.000822	0.001038	0.001439	0.038669	0.038964	0.04019	0.014302	0.07348	0.044422	0.056136	0.077791	Nycteris_tragata	348	0	1
467	1	77.1981	160	17.7778	1.92353	1.00102	1	4.89591	0.000912	0.000721	0.000781	0.001276	0.055224	0.055646	0.057397	0.020425	0.070424	0.055623	0.060292	0.098528	Cavia_porcellus	349	0	1
469	1	74.0121	177	19.6667	1.9916	1.03556	1	4.212	0.001041	0.000716	0.000783	0.002056	0.052945	0.05335	0.055028	0.019582	0.077067	0.052991	0.057951	0.152203	Rattus_norvegicus	350	0	1
470	1	74.0121	174	19.3333	1.83087	1.02626	1	3.71737	0.000903	0.000726	0.000781	0.001054	0.052945	0.05335	0.055028	0.019582	0.066826	0.05374	0.057803	0.078011	Sciurus_carolinensis	351	0	1
471	1	84.5341	147	16.3333	1.82681	0.99211	1	3.76909	0.000863	0.000723	0.000785	0.000653	0.060472	0.060934	0.062851	0.022366	0.072989	0.061115	0.066402	0.05516	Oryctolagus_cuniculus	352	0	1
474	1	67.6368	425	47.2222	4.47794	1.0076	1	7.68202	0.001977	0.000846	0.001024	0.001835	0.048384	0.048754	0.050288	0.017896	0.1337	0.057249	0.069227	0.124095	Tarsius_syrichta	353	0	1
554	1	26.7893	406	45.1111	3.95611	1.0411	1	9.42994	0.001641	0.000845	0.001006	0.001742	0.019164	0.01931	0.019918	0.007088	0.04395	0.022636	0.02695	0.046678	Varecia_rubra	354	0	1
560	1	9.09028	425	47.2222	4.35307	1.14136	1	13.8234	0.0018	0.000799	0.001008	0.004113	0.006503	0.006552	0.006759	0.002405	0.016359	0.00726	0.009163	0.037385	Eulemur_rubriventer	355	0	1
562	1	7.3331	436	48.4444	4.27164	0.998799	1	8.84694	0.001916	0.000824	0.001036	0.003493	0.005246	0.005286	0.005452	0.00194	0.014051	0.006043	0.007597	0.025612	Eulemur_mongoz	356	0	1
563	1	7.3331	427	47.4444	5.82577	0.737241	1	37.139	0.001996	0.00085	0.001031	0.003441	0.005246	0.005286	0.005452	0.00194	0.014635	0.00623	0.007564	0.025231	Eulemur_coronatus	357	0	1
566	1	36.0715	375	41.6667	4.14114	0.811165	1	16.3981	0.001714	0.000815	0.000951	0.003264	0.025804	0.026001	0.026819	0.009544	0.061816	0.029412	0.034322	0.117743	Perodicticus_potto	358	0	1
568	1	11.6523	366	40.6667	3.3469	0.995356	1	5.5828	0.001439	0.000789	0.000921	0.001388	0.008335	0.008399	0.008663	0.003083	0.016764	0.009189	0.010726	0.016169	Nycticebus_pygmaeus	359	0	1
569	1	11.6523	365	40.5556	3.63126	0.996292	1	8.20999	0.001515	0.000761	0.000921	0.002619	0.008335	0.008399	0.008663	0.003083	0.017655	0.008873	0.010731	0.030519	Nycticebus_coucang	360	0	1
571	1	22.3	394	43.7778	4.073	0.909681	1	10.516	0.001809	0.000812	0.00098	0.003407	0.015952	0.016074	0.01658	0.0059	0.040345	0.018105	0.021851	0.075981	Otolemur_crassicaudatus	361	0	1
572	1	22.3	372	41.3333	4.11525	1.14843	1	12.4162	0.001694	0.000759	0.000955	0.003952	0.015952	0.016074	0.01658	0.0059	0.037778	0.016927	0.021285	0.088138	Galago_moholi	362	0	1
576	1	42.2	71	7.88889	1.25283	0.981824	1	2.29817	0.000889	0.000724	0.000739	0.001794	0.030188	0.030419	0.031376	0.011165	0.037529	0.030572	0.031207	0.075694	Monodelphis_domestica	363	0	1
577	1	42.2	66	7.33333	1.46609	0.850328	1	9.57996	0.00106	0.000878	0.000743	0.008388	0.030188	0.030419	0.031376	0.011165	0.044723	0.037054	0.031355	0.353983	Didelphis_virginiana	364	0	1
581	1	4.7	136	15.1111	1.57642	0.997329	1	3.7039	0.000889	0.000717	0.000749	0.001148	0.003362	0.003388	0.003494	0.001244	0.004178	0.003371	0.003518	0.005397	Dasyurus_hallucatus	365	0	1
583	1	4.5	144	16	1.68154	0.96976	1	4.47735	0.000927	0.000725	0.00075	0.001417	0.003219	0.003244	0.003346	0.001191	0.004171	0.00326	0.003375	0.006378	Dasyurus_viverrinus	366	0	1
584	1	4.5	145	16.1111	1.57179	1.00483	1	3.63762	0.000907	0.000722	0.000748	0.001199	0.003219	0.003244	0.003346	0.001191	0.004084	0.003251	0.003364	0.005394	Dasyurus_maculatus	367	0	1
585	1	4.8	121	13.4444	1.5574	0.978203	1	2.81555	0.000948	0.00072	0.000749	0.001676	0.003434	0.00346	0.003569	0.00127	0.004549	0.003454	0.003593	0.008044	Sarcophilus_harrisii	368	0	1
587	1	20.33	127	14.1111	1.54222	0.974405	1	2.35912	0.000877	0.000715	0.000746	0.00126	0.014543	0.014654	0.015115	0.005379	0.017835	0.014542	0.015166	0.025615	Thylacinus_cynocephalus	369	0	1
588	1	4.362	120	13.3333	1.60654	0.977728	1	3.2613	0.000911	0.000705	0.000746	0.001525	0.00312	0.003144	0.003243	0.001154	0.003973	0.003074	0.003254	0.006652	Nimbacinus_dicksoni	370	0	1
589	1	39.3	41	4.55556	1.15202	1.00989	1	1.57268	0.000812	0.00071	0.000744	0.001373	0.028113	0.028328	0.02922	0.010398	0.031922	0.027896	0.029259	0.053959	Didelphodon_vorax	371	0	1
599	1	19.2469	467	51.8889	2.00151	1.00868	1	3.55103	0.000925	0.000714	0.000758	0.00099	0.013768	0.013874	0.01431	0.005092	0.017797	0.013749	0.014582	0.019062	Tomistoma_schlegelii	372	0	1
600	1	19.2469	467	51.8889	2.29325	0.979659	1	4.26312	0.001092	0.000727	0.000777	0.001651	0.013768	0.013874	0.01431	0.005092	0.021011	0.013996	0.014955	0.031782	Gavialis_gangeticus	373	0	1
607	1	3.417	482	53.5556	2.79249	0.774362	1	15.7831	0.00104	0.00073	0.00078	0.001427	0.002444	0.002463	0.002541	0.000904	0.003553	0.002494	0.002665	0.004877	Crocodylus_moreletii	374	0	1
608	1	3.417	486	54	2.2724	0.974181	1	4.68604	0.000991	0.000713	0.000777	0.001095	0.002444	0.002463	0.002541	0.000904	0.003385	0.002437	0.002653	0.003741	Crocodylus_rhombifer	375	0	1
610	1	1.7889	500	55.5556	2.41051	0.991621	1	4.19958	0.001189	0.000727	0.000791	0.001656	0.00128	0.001289	0.00133	0.000473	0.002127	0.001301	0.001416	0.002963	Crocodylus_acutus	376	0	1
611	1	1.7889	500	55.5556	2.91289	0.942822	1	7.28347	0.001291	0.000711	0.000804	0.001984	0.00128	0.001289	0.00133	0.000473	0.00231	0.001272	0.001439	0.00355	Crocodylus_intermedius	377	0	1
612	1	6.8193	477	53	1.96772	1.01329	1	3.28147	0.000898	0.000706	0.000758	0.000851	0.004878	0.004916	0.00507	0.001804	0.006127	0.004813	0.005167	0.005801	Crocodylus_niloticus	378	0	1
615	1	5.948	490	54.4444	2.19533	0.985982	1	5.21656	0.001118	0.000705	0.000749	0.004508	0.004255	0.004287	0.004422	0.001574	0.006651	0.004195	0.004458	0.026815	Crocodylus_siamensis	379	0	1
616	1	5.948	485	53.8889	2.13908	1.02626	1	5.00076	0.000953	0.000739	0.000748	0.001851	0.004255	0.004287	0.004422	0.001574	0.005668	0.004393	0.00445	0.011011	Crocodylus_palustris	380	0	1
617	1	8.8246	474	52.6667	1.97187	0.985317	1	3.8029	0.000876	0.000721	0.00075	0.000851	0.006313	0.006361	0.006561	0.002335	0.007734	0.006359	0.006618	0.00751	Crocodylus_porosus	381	0	1
620	1	4.5279	475	52.7778	2.00849	0.982679	1	3.89767	0.000948	0.000724	0.000746	0.001803	0.003239	0.003264	0.003366	0.001198	0.004295	0.003277	0.00338	0.008163	Crocodylus_novaeguineae	382	0	1
621	1	4.5279	477	53	2.00247	1.00971	1	3.59669	0.000911	0.000711	0.000748	0.000946	0.003239	0.003264	0.003366	0.001198	0.004126	0.003219	0.003388	0.004285	Crocodylus_mindorensis	383	0	1
622	1	10.0591	469	52.1111	1.93922	0.996801	1	3.63012	0.000868	0.000716	0.000744	0.000818	0.007196	0.007251	0.007479	0.002661	0.008731	0.007203	0.007481	0.008229	Crocodylus_johnsoni	384	0	1
624	1	17.7057	503	55.8889	3.90522	0.985094	1	13.0467	0.001689	0.000731	0.000836	0.002922	0.012666	0.012763	0.013164	0.004685	0.029906	0.012946	0.014793	0.051735	Osteolaemus_tetraspis	385	0	1
625	1	17.7057	494	54.8889	2.90318	1.03467	1	9.83089	0.001238	0.000727	0.000806	0.001654	0.012666	0.012763	0.013164	0.004685	0.021925	0.012867	0.014271	0.029288	Mecistops_cataphractus	386	0	1
629	1	13.2637	490	54.4444	1.89108	0.974839	1	4.3575	0.000904	0.000703	0.000726	0.001947	0.009488	0.009561	0.009862	0.003509	0.011986	0.00933	0.009629	0.025824	Paleosuchus_palpebrosus	387	0	1
630	1	13.2637	494	54.8889	1.79423	1.01127	1	3.0321	0.000852	0.000714	0.000729	0.001013	0.009488	0.009561	0.009862	0.003509	0.011301	0.009474	0.009667	0.013436	Paleosuchus_trigonatus	388	0	1
633	1	8.3354	507	56.3333	2.05137	1.01752	1	5.26061	0.000907	0.000708	0.000729	0.001265	0.005963	0.006008	0.006197	0.002205	0.007559	0.005902	0.006075	0.010541	Caiman_latirostris	389	0	1
635	1	3.2834	516	57.3333	2.23387	0.924389	1	8.91258	0.000985	0.000733	0.000733	0.002082	0.002349	0.002367	0.002441	0.000869	0.003233	0.002406	0.002406	0.006836	Caiman_crocodilus	390	0	1
636	1	3.2834	514	57.1111	1.94797	1.00008	1	3.57359	0.00092	0.000717	0.00073	0.001282	0.002349	0.002367	0.002441	0.000869	0.003021	0.002355	0.002395	0.004209	Caiman_yacare	391	0	1
637	1	12.4283	491	54.5556	1.8678	0.986343	1	4.15686	0.000831	0.000728	0.000728	0.001002	0.008891	0.008959	0.00924	0.003288	0.010323	0.009047	0.00905	0.012452	Melanosuchus_niger	392	0	1
639	1	53.0186	472	52.4444	1.8464	1.00808	1	3.30966	0.000871	0.000729	0.000733	0.001223	0.037927	0.038217	0.039419	0.014028	0.046171	0.038657	0.038879	0.06484	Alligator_sinensis	393	0	1
640	1	53.0186	477	53	1.83352	0.970851	1	3.67718	0.000885	0.00071	0.000729	0.001952	0.037927	0.038217	0.039419	0.014028	0.046926	0.037625	0.038651	0.103477	Alligator_mississippiensis	394	0	1
644	1	15.5	454	50.4444	7.02401	0.927957	1	24.3243	0.002625	0.000842	0.001046	0.004817	0.011088	0.011173	0.011524	0.004101	0.040687	0.013057	0.016214	0.074671	Parasuchus_hislopi	395	0	1
795	1	54.2	327	36.3333	4.05761	0.921559	1	15.0092	0.001548	0.000767	0.000891	0.002263	0.038772	0.039069	0.040298	0.01434	0.083888	0.041559	0.048265	0.122634	Staurotypus_triporcatus	396	0	1
796	1	54.2	324	36	3.28474	0.91627	1	8.48288	0.001436	0.000789	0.000881	0.00225	0.038772	0.039069	0.040298	0.01434	0.077822	0.042762	0.047732	0.121956	Sternotherus_odoratus	397	0	1
799	1	73.1	358	39.7778	4.22727	0.947687	1	18.2993	0.001598	0.000789	0.000913	0.003345	0.052292	0.052692	0.05435	0.019341	0.116828	0.057678	0.066704	0.244497	Platysternon_megacephalum	398	0	1
802	1	68.7	390	43.3333	3.37297	1.00433	1	6.0882	0.001532	0.000798	0.000937	0.002029	0.049145	0.04952	0.051078	0.018177	0.10523	0.054813	0.064338	0.139386	Testudo_horsfieldii	399	0	1
804	1	47.7	410	45.5556	3.33864	1.0192	1	5.7118	0.0015	0.000824	0.000964	0.001516	0.034122	0.034383	0.035465	0.012621	0.07154	0.039321	0.046	0.072323	Mauremys_reevesii	400	0	1
805	1	47.7	422	46.8889	3.98339	0.952069	1	9.61996	0.001822	0.000867	0.000977	0.003793	0.034122	0.034383	0.035465	0.012621	0.086887	0.04136	0.046624	0.180913	Batagur_borneoensis	401	0	1
807	1	42.6433	369	41	2.98998	0.997453	1	5.3253	0.001288	0.000791	0.000904	0.001074	0.030505	0.030738	0.031705	0.011283	0.054921	0.033732	0.038571	0.045793	Terrapene_carolina	402	0	1
808	1	42.6433	371	41.2222	3.0596	1.0213	1	5.35889	0.001346	0.000791	0.000904	0.001294	0.030505	0.030738	0.031705	0.011283	0.057393	0.033746	0.038571	0.055168	Trachemys_scripta	403	0	1
810	1	42.0433	370	41.1111	4.07966	1.14214	1	13.9197	0.001646	0.000799	0.000934	0.002196	0.030076	0.030306	0.031259	0.011124	0.069212	0.033581	0.039278	0.092318	Chelydra_serpentina	404	0	1
811	1	42.0433	437	48.5556	5.73421	1.2913	1	23.6983	0.002491	0.000831	0.001027	0.003937	0.030076	0.030306	0.031259	0.011124	0.104736	0.034934	0.043179	0.165523	Macrochelys_temminckii	405	0	1
813	1	77.7	277	30.7778	3.10873	0.948452	1	13.6973	0.001201	0.000757	0.000858	0.001763	0.055583	0.056008	0.05777	0.020558	0.093336	0.058788	0.066667	0.137012	Dogania_subplana	406	0	1
815	1	56.78	306	34	2.981	1.05104	1	6.46759	0.001292	0.000773	0.000863	0.001904	0.040618	0.040928	0.042216	0.015023	0.073368	0.043899	0.049001	0.108133	Apalone_ferox	407	0	1
816	1	56.78	286	31.7778	2.95772	1.01162	1	7.15663	0.001263	0.000749	0.00086	0.00207	0.040618	0.040928	0.042216	0.015023	0.071734	0.042501	0.048857	0.11755	Pelodiscus_sinensis	408	0	1
818	1	125.88	312	34.6667	4.09349	0.941568	1	12.1356	0.001702	0.000783	0.000891	0.003015	0.090048	0.090737	0.093591	0.033306	0.214305	0.098612	0.112096	0.379519	Chelus_fimbriata	409	0	1
819	1	125.88	301	33.4444	4.54504	1.18385	1	18.8668	0.001724	0.000778	0.00088	0.003333	0.090048	0.090737	0.093591	0.033306	0.216961	0.097972	0.110795	0.419563	Pelomedusa_subrufa	410	0	1
824	1	154.721	198	22	2.31184	1.00487	1	4.0226	0.001191	0.000735	0.000792	0.002072	0.11068	0.111526	0.115035	0.040937	0.184298	0.113789	0.122539	0.320578	Gallotia_galloti	411	0	1
825	1	154.721	161	17.8889	1.88946	0.995474	1	3.57463	0.00092	0.000721	0.000775	0.001143	0.11068	0.111526	0.115035	0.040937	0.142352	0.111575	0.119831	0.176805	Tupinambis_merianae	412	0	1
830	1	38.6	184	20.4444	1.86036	0.983848	1	4.07221	0.000899	0.000723	0.000758	0.001317	0.027613	0.027824	0.028699	0.010213	0.03471	0.027923	0.029247	0.050855	Saara_hardwickii	413	0	1
831	1	38.6	178	19.7778	1.89202	0.959172	1	4.2605	0.000897	0.000723	0.000762	0.001275	0.027613	0.027824	0.028699	0.010213	0.034634	0.027904	0.029394	0.049228	Uromastyx_acanthinura	414	0	1
832	1	92.102	166	18.4444	1.77506	0.987396	1	2.9248	0.000864	0.000735	0.000762	0.001068	0.065885	0.066389	0.068478	0.024369	0.079552	0.067669	0.070136	0.098389	Laudakia_stellio	415	0	1
836	1	47.843	220	24.4444	2.25469	0.990013	1	4.54157	0.001078	0.000718	0.000777	0.00184	0.034225	0.034486	0.035571	0.012659	0.051552	0.03433	0.037157	0.088011	Anolis_chloris	416	0	1
843	1	16.3356	282	31.3333	1.73131	0.891645	1	4.60974	0.000782	0.000721	0.000726	0.000787	0.011686	0.011775	0.012146	0.004322	0.012783	0.011775	0.011868	0.012849	Anolis_gundlachi	417	0	1
844	1	16.3356	283	31.4444	1.78657	0.93704	1	5.02132	0.000785	0.000713	0.000724	0.000843	0.011686	0.011775	0.012146	0.004322	0.012819	0.01165	0.011835	0.01377	Anolis_pulchellus	418	0	1
845	1	18.8222	271	30.1111	1.50024	0.957813	1	2.2091	0.000733	0.000718	0.000726	0.000479	0.013464	0.013567	0.013994	0.00498	0.013804	0.013512	0.013665	0.009011	Anolis_cristatellus	419	0	1
846	1	26.2039	254	28.2222	1.71542	0.940186	1	3.57732	0.000837	0.000717	0.000733	0.001248	0.018745	0.018888	0.019483	0.006933	0.021922	0.018789	0.019221	0.032694	Anolis_distichus	420	0	1
849	1	9.90726	269	29.8889	1.73589	0.950813	1	3.078	0.000858	0.00073	0.000737	0.001292	0.007087	0.007141	0.007366	0.002621	0.008503	0.007232	0.007302	0.012799	Anolis_limifrons	421	0	1
850	1	9.90726	255	28.3333	1.55524	0.965942	1	2.46231	0.00074	0.000729	0.00073	0.000472	0.007087	0.007141	0.007366	0.002621	0.007336	0.007221	0.007237	0.004681	Anolis_oxylophus	422	0	1
852	1	21.0058	266	29.5556	1.61503	0.970023	1	2.69255	0.000757	0.000725	0.000737	0.000493	0.015027	0.015141	0.015618	0.005558	0.015902	0.015224	0.015481	0.010347	Anolis_garmani	423	0	1
853	1	21.0058	258	28.6667	1.74085	0.934901	1	3.94066	0.000809	0.000724	0.000737	0.000975	0.015027	0.015141	0.015618	0.005558	0.017	0.015212	0.015481	0.020485	Anolis_valencienni	424	0	1
854	1	34.4221	220	24.4444	1.77283	1.02779	1	4.65677	0.0008	0.000722	0.000738	0.00077	0.024624	0.024812	0.025593	0.009108	0.027524	0.024863	0.025404	0.026513	Anolis_sheplani	425	0	1
855	1	39.7116	222	24.6667	2.65977	1.10505	1	9.72084	0.001182	0.000747	0.000774	0.002474	0.028408	0.028625	0.029526	0.010507	0.046948	0.029654	0.030735	0.098266	Anolis_equestris	426	0	1
856	1	47.843	180	20	1.74613	0.970359	1	3.05569	0.00081	0.000718	0.000751	0.000581	0.034225	0.034486	0.035571	0.012659	0.038731	0.03436	0.035954	0.027781	Dactyloa_frenata	427	0	1
858	1	25.3818	182	20.2222	1.86102	0.963887	1	3.54274	0.000886	0.000736	0.00076	0.001108	0.018157	0.018296	0.018871	0.006716	0.022484	0.018679	0.01928	0.028126	Norops_humilis	428	0	1
859	1	25.3818	178	19.7778	1.83705	0.996974	1	3.49694	0.000872	0.000717	0.000756	0.000912	0.018157	0.018296	0.018871	0.006716	0.022131	0.018195	0.019185	0.023154	Norops_auratus	429	0	1
861	1	17.4368	198	22	2.49222	1.02278	1	5.68043	0.001199	0.000732	0.000787	0.001959	0.012473	0.012569	0.012964	0.004614	0.020906	0.012761	0.013723	0.034152	Xenosaurus_platyceps	430	0	1
862	1	17.4368	202	22.4444	2.87682	1.09397	1	10.1074	0.001185	0.000736	0.000798	0.001751	0.012473	0.012569	0.012964	0.004614	0.02066	0.012833	0.013906	0.030539	Xenosaurus_grandis	431	0	1
864	1	31.6805	158	17.5556	2.05644	1.03307	1	3.97784	0.001052	0.000724	0.000777	0.001884	0.022663	0.022836	0.023554	0.008382	0.033332	0.02293	0.0246	0.059676	Tiliqua_scincoides	432	0	1
865	1	31.6805	134	14.8889	2.06951	1.05478	1	6.87577	0.000917	0.000737	0.000772	0.001124	0.022663	0.022836	0.023554	0.008382	0.029066	0.023337	0.024457	0.035601	Corucia_zebrata	433	0	1
866	1	251.53	90	10	1.57308	1.00553	1	2.3728	0.0008	0.000723	0.000765	0.000441	0.179932	0.181309	0.187013	0.066551	0.201163	0.181908	0.192421	0.110825	Sphenodon_punctatus	434	0	1
